# Supplementary material
Source: Research Square preprint supplement (doi:10.21203/rs.3.rs-9806841/v1)
Supplement: Supplementary file 1 [file 90ee4c76a1b16dce0b1f1d5e.xlsx]

## Sheet: Sheet1
Patient ID（Amos）	Sex	Sex1	Age	Weight	Height	BMI	Waist_cir	Waist	Hip_cir	Hip		WHR (Waist-Hip Ratio)	Breast_circumference	Neck_circumference	CRP (<100)	WBC(39-106)	(嗜中性粒细胞百分比)Neutropil %	淋巴细胞百分比 (lymphocytes%)	单核细胞百分比(Monocytes%)	嗜酸性细胞百分比(eosinophils%)	嗜碱性细胞百分比(basophils%)	Neutrophil	HGB (120-160)	红细胞压积(Hematocrit)	平均红细胞体积(Mean Cell Vol)	红细胞平均血红蛋白含量(MCH)	红细胞平均血红蛋白浓度(MCHC)	红细胞分布宽度(RSW-SD)	红细胞分布宽度 (RDW)	血小板计数(Platelet Count)	平均血小板体积(mean platelet volume)	血小板比积(Platelet hematocrit)	血小板体积分布宽度(PDW)	K	Na	Cl	总二氧化碳(CO2)	Fasting Glucose	Urea (21-71) mmol/L	Creatinine	Uric Acid (umol/l)	Cystatin-C	Ca	P	Mg	铜蓝蛋白(Ceruloplasmin)	Cu	Zn	Fe
99001	female	2	21	104	167.9	37.1	122	122	123	123	0.99187	0.99187	125	41.5	7.09	9.45	62.29	29.8	6.34	1.36	0.21	5.89	122.5	37.39	90.23	29.55	327.5	40.69	13.09	297.8	8.72	0.04	0.004	3.89	141.6	105.6	23.4	5.2	3.93	58.3	466.7	0.72	2.39	1.2	0.95	0.32	16	8	17.1
99002	male	1	18	149.2	188.6	40.9	136	136	136	136	1	1	136.5	45.5	8.49	8.72	56.1	35.9	5.8	1.7	0.5	4.89	175	52.2	86.5	28.9	334	41.1	13	278	8.8	0.244	16.1	4.38	137.4	100	27.9	5.41	5.61	70.4	556.6	0.93	2.43	1.36	0.94	0.28	12.5	9.15	27.3
99003	male	1	21	140.9	176.3	45.3	135.2	135.2	133.3	133.3	1.01425	1.01425	139	50	4.66	9.97	59.2	32.3	5.2	2.7	0.6	5.9	153	44	87.1	30.4	349	39.3	12.3	288	9.5	0.273	16.1	3.8	140.4	101.3	21.3	4.4	2.64	62	570	1.14	2.37	1.53	0.85	0.14	5.8	14.6	20
99004	female	2	19	142.7	171.9	48.3	130	136	144	133.5	1.01873	0.902778	126.5	42	16.21	7.05	55.3	34.8	4.9	4	1	3.9	108	33.8	72.8	23.2	319	43.5	16.2	365	9.4	0.343	15.6	4.27	139.3	104.6	23.1	5.17	5.7	44.2	419.2	0.83	2.2	1.65	0.83	0.35	19.2	7.66	4.2
99005	male	1	12	103.4	166.1	37.5	110.5	110.5	126	126	0.876984	0.876984	114	40.5	2.61	6.64	60.1	31.6	4.6	3.2	0.5	3.99	149	44.2	87.4	29.5	337	39.2	12.2	410	8.1	0.331	15.3	4.17	138.8	104.4	22.8	4.81	4.59	51.8	469.3	1.04	2.48	1.4	0.82	0.29	12.8	10.42	24.3
99006	male	1	29	129.7	180.4	39.9	136	136	133.5	133.5	1.01873	1.01873	127.4	44.5	7.84	6.43	67.1	25.9	4.3	2.2	0.5	4.31	167	50	87.1	29	333	40.4	12.7	275	9.2	0.254	16.2	4.6	138.9	102.3	28.3	5.11	2.69	70.1	430.2	0.84	2.56	1.14	0.86	0.29	14.5	10.331	17.3
99007	female	2	48	73.2	162	27.9	103.5	103.5	97.5	97.5	1.06154	1.06154	106	36	3.27	5.77	56.6	36	6.1	0.9	0.4	3.27	128	39.5	75.7	24.6	325	37.1	13.3	328	10.1	0.332	16	3.89	138.9	103.2	23.5	7.44	2.81	55	506	0.68	2.09	1.23	0.65	0.32	15.5	9.12	7.7
99008	male	1	33	110.5	173.5	36.5	116.5	116.5	114	114	1.02193	1.02193	119	45	8.05	5.3	44	44.3	7.5	3.2	1	2.33	174	50.3	92.3	32	347	42.4	12.6	164	11.1	0.182	16.4	3.81	140.2	103.2	22.2	7.44	4.15	41	305	0.72	2.23	1.22	0.91	0.3	15.9	12.9	20.1
99009	female	2	46	84.7	164	31.5	104	104	105	105	0.990476	0.990476	111	36.5	3.4	5.18	43.6	47.6	5.7	2.2	0.9	2.25	127	37.9	90.6	30.3	334	43.7	13.2	260	9.2	0.238	16.2	3.9	137.8	104.1	24.8	4.7	5.99	57.8	347.2	0.8	2.167	1.56	0.77	0.24	12.3	7.75	25.6
99010	female	2	19	96	162.3	36.4	116	116	116.6	116.5	0.995708	0.994854	116	44	3.48	10.14	62	30.6	5.2	1.7	0.5	6.29	137	40.4	90.6	30.7	339	41.9	12.5	291	10.5	0.306	16	3.8	135.9	101.8	25.4	5.03	4.93	49.6	428.4	0.64	2.39	1.55	0.73	0.3	15.5	6.92	18.7
99011	female	2	18	98.2	174.1	32.4	101	101	117.5	117.5	0.859574	0.859574	113	38	12.38	3.12	43.4	42.2	10	3.7	0.7	1.35	142	41.4	80.6	27.6	342	38.6	13.1	177	11.2	0.199	16.4	3.67	134.5	99.6	24.8	5	2.55	47.8	360.7	0.81	2.25	1.2	0.79	0.37	21	7.54	9.4
99012	male	1	16	114.4	180.7	35	113	113	118.5	118.5	0.953586	0.953586	112	46.5	2.53	8	45	40.5	7.3	6.7	0.5	3.6	155	45.4	87.7	29.8	340	38.9	12.2	364	7.8	0.286	15.6	4.2	136.9	102.1	26.2	4.01	3.7	65.2	642.7	0.85	2.47	1.42	0.91	0.25	11.6	8.6	15.2
99013	female	2	28	117.2	171	40.1	122	122	126.5	126.5	0.964427	0.964427	116	43.5	14.83	5.01	33.1	54.7	9.5	1.9	0.8	1.65	138	41.1	91.3	30.7	336	41.3	12.3	237	8.3	0.197	15.8	3.88	133.1	103	23	5.89	2.51	43.9	258.2	0.93	2.14	1.13	0.79	0.3	15.8	9.96	12.3
99014	male	1	26	186	169.8	64.7	171	171	148	148	1.15541	1.15541	162	55.8	35.68	9.2	68.4	22.3	5.3	3.7	0.3	6.29	154	49.5	90	28.1	312	49.2	15	258	7.5	0.193	15.7	4.16	135	99.9	26.1	5.58	3.9	66.4	252.3	1.22	2.18	1.25	0.76	0.39	22.8	7.87	14.5
99015	female	2	23	93.5	168.4	33	108	108	112	112	0.964286	0.964286	113	39	51.69	15.35	80.1	13.9	5.1	0.5	0.4	12.3	138	40.2	91.1	31.2	342	43.3	13	225	9.6	0.217	16.2	3.7	136.6	104.7	22.3	4.76	4.15	49.8	360.2	0.8	2.29	1.38	0.97	0.3	13.6	9.13	7.7
99016	female	2	31	122.3	160.7	47.4	121	121	143	143	0.846154	0.846154	127.5	41	29.95	10.41	59.2	33.7	4.6	2.2	0.3	6.16	131	39.3	85	28.5	335	40.3	12.9	326	9.1	0.295	15.7	3.86	134	103.7	22.7	4.81	5.96	70.2	426.5	1	2.27	1.46	0.8	0.51	38.3	8.17	14.5
99017	male	1	31	112.8	168.7	39.6	127	127	113.5	113.5	1.11894	1.11894	128.5	49	6.75	4.84	53.7	37.5	6.9	1.6	0.3	2.6	158	46.7	88.4	30	339	40.7	12.6	191	11.4	0.217	17.1	3.97	137	94.9	25.4	13.3	5.15	65	411	0.92	2.24	0.94	0.75	0.24	12.1	9	18.7
99018	female	2	31	72.2	166.5	28.3	89	89	104	104	0.855769	0.855769	106	38	1.8	4.81	32.2	45.3	8.8	11	2.7	1.55	134	41.4	87.3	28.4	325	42.1	13.1	206	10.4	0.214	15.9	4.16	142.2	105.6	26.6	5.35	3.99	41	345	0.88	2.2	1.34	0.89	0.28	14.6	9.2	40.4
99019	female	2	38	103	169.9	35.7	119	119	123	123	0.96748	0.96748	111	39	3.09	4.91	43.2	50.2	3.8	2.3	0.5	2.13	101	31.5	71.3	22.8	320	42.5	16.1	376	9.4	0.354	15.8	3.84	139.1	105.9	22.9	5.64	5.63	40.1	347.2	0.86	2.21	1.1	0.91	0.31	16	8.19	5.3
99020	male	1	23	139.6	169.7	48.5	148.5	148.5	141.5	141.5	1.04947	1.04947	139	50	24.3	10.1	65.4	26.8	6.1	1.4	0.3	6.6	162	49	88.2	29.2	331	40.6	12.6	279	10.5	0.295	16.2	4.16	137.7	102.6	25.4	4.56	4.39	73.6	554.7	1.12	2.39	1.28	0.92	0.36	20.9	9.15	13.2
99021	male	1	20	126	167.8	44.7	138	138	125.5	125.5	1.0996	1.0996	128.5	42.5	8.52	9.65	51.1	39	7.1	2.2	0.6	4.93	161	47.8	86.8	29.2	337	39.4	12.4	367	9.1	0.335	15.9	4.15	135.8	99.6	24.2	4.72	4.06	65.9	426.9	1.04	2.54	1.56	0.87	0.31	15.8	8.32	10.2
99022	male	1	20	139.3	184	41.1	131	131	124.5	124.5	1.05221	1.05221	137	47	11.81	5.7	62	29.6	4.7	3.1	0.6	3.53	153	48.5	78.8	24.9	316	38.8	13.5	265	10.9	0.29	16.8	4.33	141.9	101.8	24.4	15.22	4.065	60	631	1.01	2.31	1.07	0.78	0.29	15.4	7.9	11.1
99023	female	2	43	105.5	159.5	41.5	115	115	130.5	130.5	0.881226	0.881226	112	39.5	4.59	5.36	55	36.1	6.7	1.4	0.8	2.95	141	43.6	90.3	29.1	323	43.4	13.1	294	8.9	0.26	16	3.44	136.6	102.7	25.6	6.92	3.22	46	404	0.96	2.24	1	0.89	0.31	15.5	8.23	21.5
99024	female	2	30	109.8	162.9	41.4	112	112	129	129	0.868217	0.868217	119	42	1.79	10.26	60.36	28.21	8.68	2.43	0.32	6.19	137.8	43.23	85.62	27.29	318.9	37.63	12.76	281.4	10.27	0.276	16.4	3.88	137.2	103.8	25.3	7.08	2.34	46.5	413.9	0.67	2.31	1.14	0.76	0.37	22.8	7.82	17.4
99025	female	2	34	88.9	152.2	38.4	119.5	119.5	123	123	0.971545	0.971545	115	37.3	16.82	8.63	53.43	37.13	8.06	1.14	0.24	4.61	134.8	41.94	91.81	29.5	321.3	41.13	13.05	246.3	8.3	0.215	16	3.6	139.1	105.9	24.8	4.73	4.47	68.6	342.6	0.72	2.26	1.22	0.95	0.34	17.9	7.42	12.2
99026	male	1	23	106.6	170.5	36.7	113.5	113.5	119	119	0.953782	0.953782	108.5	43	2.2	8.42	62.9	28.2	6.4	2.2	0.3	5.29	172	52.4	86.8	28.6	329	39.6	12.5	184	11.7	0.216	16.7	4.09	138	103.1	26.4	4.75	3.76	86.4	472.3	0.8	2.32	0.89	0.91	0.24	12.6	10.62	31.8
99027	male	1	13	116.2	165.2	42.6	137.5	137.5	122	122	1.12705	1.12705	131	42	7.34	7.85	48.4	40.4	6.2	4.8	0.2	3.79	152	46.7	83.2	27.2	326	38.7	12.8	307	9.2	0.284	16.3	4.2	135.5	100.1	24.9	5.16	6.04	49.2	556.8	0.86	2.4	1.58	0.888	0.33	18.9	8.69	11.1
99028	female	2	36	78.7	163.3	29.5	95.5	88.2	106	100.7	0.875869	0.900943	106	39	0.47	5.99	52	41.8	3.8	1.9	0.5	3.12	124	38.1	76.6	24.8	324	35.1	12.4	282	10.5	0.296	16.6	3.84	139.4	102.2	21.1	7.31	4.53	53	274	0.8	2.2	1.45	0.87	0.32	17.4	8.11	6.4
0002	female	2	32	77.8	160.8	30.2	102.5	102.5	107	107	0.957944	0.957944	105	36.7	1.01	11.05	52.79	34.65	9.08	2.62	0.86	5.83	117	37.02	89.72	28.25	316.1	42.88	14	271.5	10.05	0.31	15.6	3.74	137.8	106.2	22.9	5.44	3.83	48.7	350	0.51	2.24	1.2	0.77	0.31	16.5	6.98	14.9
0003	female	2	29	93.5	168.3	34.5	112	112	114	114	0.982456	0.982456	116	41	12.61	10.77	65.7	25.9	6	1.7	0.7	7.07	142	45.2	92.8	29.3	315	43.7	12.9	334	9.4	0.313	15.8	4.19	141.1	103	26.6	4.87	4.48	65	481	1	2.25	1.51	0.9	0.27	16	8.6	19.8
0004	male	1	40	189.6	170.9	64.9	170	170	163.5	163.5	1.03976	1.03976	105.5	52	11.64	6.76	90	8.7	1.2	0	0.1	6.08	154	49.7	82.3	25.5	309	52.1	17.2	198	10.6	0.21	16.4	3.46	139.4	102.1	22	10.96	5.8	77	614	1.52	2.3	1.25	0.74	0.45	31.5	6.67	7.8
0005	male	1	36	162.5	159.3	64	169.2	169.2	160	160	1.0575	1.0575	162.5	54	19.95	9.26	80.4	14	5.4	0.1	0.1	7.44	153	47	95	30.9	325	44.3	12.8	140	11.4	0.159	17	3.93	142.3	100	25.1	5.68	5.02	60	631	1.42	2.15	0.7	0.73	0.32	16.6	8.44	18
0006	male	1	34	176.6	181.5	53.6	161	161	159	159	1.01258	1.01258	137	47.5	1.57	8.04	53.4	37.4	5.1	3.4	0.8	4.3	173	51.8	92.5	30.8	333	43.7	12.9	168	11.1	0.186	16.3	4.21	139.6	107.6	24.9	5.03	6.4	83.3	604	1.07	2.24	1.13	0.8	0.28	13.2	8.95	30.2
0007	male	1	55	119.8	177.7	37.9	130	130	118	118	1.10169	1.10169	122	46	7.08	6.69	63.13	25.93	7.31	2.93	0.8	4.22	147.1	44.91	96.39	31.57	327.5	45.06	13.62	129.7	10.4	0.157	17	3.37	139.8	105.4	24.5	5.56	8.72	94.2	495.3	1.2	2.09	1.17	0.73	0.29	14.5	7.35	21.2
0008	female	2	26	114.1	161.3	43.9	131.5	131.5	128.5	128.5	1.02335	1.02335	133	39.5	7.25	7.24	61.9	30.1	5.5	2.2	0.3	4.48	134	39.5	88.9	30.1	338	41.4	12.6	324	8.7	0.281	15.9	3.91	138	104.5	22.9	6.56	3.76	37.2	425.1	0.82	2.3	1.32	0.82	0.32	17.3	9.03	14.4
0009	female	2	19	83.3	161.7	31.9	116.5	116.5	120.5	120.5	0.966805	0.966805	99.5	35	8.46	8.98	52.8	37	5.1	4.5	0.6	4.75	142	43	86.6	28.6	330	41.7	13.1	291	9.5	0.227	16.1	3.8	138.7	96.8	22.7	4.52	4.15	51	336	0.99	2.32	1.19	0.88	0.3	15.6	7.33	14.2
0010	female	2	32	104.5	164.1	38.8	111.5	111.5	117.5	117.5	0.948936	0.948936	121.5	41	6.07	4.59	44.2	44.4	6.5	4.2	0.7	2.03	128	39.1	89.5	29.3	327	39.8	12	220	7.9	0.173	15.1	4.01	138.7	106.7	24.3	5.31	3.87	51.8	428.1	0.82	2.11	1.33	0.86	0.28	13.4	7.81	16.9
0011	female	2	25	102.1	156.9	41.5	117.5	117.5	127	127	0.925197	0.925197	124.5	42.5	15.4	9.66	62.9	29.2	5.9	1.5	0.5	6.08	139	40.6	81.9	28	342	37.5	12.5	338	8.5	0.228	15.4	3.89	138	104	23	4.6	4.36	48.9	495.6	0.7	2.31	1.3	0.88	0.32	15.7	8.41	21.6
0012	female	2	26	110.6	169.4	38.5	115	115	131.5	131.5	0.874525	0.874525	122	39	28.16	8.19	57.7	35.3	5.5	1	0.5	4.73	138	42.9	82.9	26.6	321	38.8	12.7	328	9.5	0.31	16.2	3.7	137.3	99.1	24.8	4.06	4.6	48	305	2.35	2.32	1.4	0.84	0.35	19	8.34	15.7
0013	male	1	29	118.3	168.3	41.8	127.5	127.5	122	122	1.04508	1.04508	124	48	13.11	6.23	55.5	36.5	5.3	2.4	0.3	3.46	174	51.4	86.6	29.3	338	42	13.2	170	10	0.171	16.6	3.93	137.9	103.5	24.7	8.88	5.15	67.2	500.4	0.98	2.46	1.6	0.87	0.294	13.4	8.46	28.8
0014	female	2	56	97.3	165.3	35.6	121.5	121.5	121.5	121.5	1	1	113	40	3.12	5.27	48.7	44.2	4.5	2.1	0.5	2.56	140	43.7	84.1	26.9	320	44.9	14.5	217	10.1	0.22	16.2	3.53	143.6	108	24	5.37	3.63	40	315	1.2	2.12	1.44	0.89	0.33	17.4	7.1	14.3
0015	male	1	27	115.6	176.6	37.1	125	125	117.5	117.5	1.06383	1.06383	122	41.5	4.67	6.02	60	31	5.8	2.3	0.5	3.61	169	50.6	90.4	30.3	335	40	12	264	9.6	0.254	15.9	4.06	138	102	25.8	8.76	3.94	59.7	432.5	0.78	2.51	1.13	0.8	0.28	18.4	8.32	38.4
0016	female	2	27	127	169.3	44.3	126	133	136.5	136.5	0.974359	0.923077	133	43.5	16.16	5.98	56.1	36.6	5.1	1.9	0.3	3.36	134	40.1	84.3	28.2	334	40.5	13	258	9.8	0.252	16.1	3.95	141	105.2	22.7	5.78	4.99	51.2	470.2	1.23	2.4	1.22	0.93	0.32	20.5	8.66	17.8
0017	male	1	30	96.1	171.6	32.6	116.5	116.5	110.5	110.5	1.0543	1.0543	117	41	4.78	7.69	57.2	36.4	3.4	1.9	1.1	4.4	151	44.8	83.6	28.2	337	41.5	13.5	257	9.6	0.246	16.5	4.35	137.3	100.5	25.3	8.97	4.86	37.6	476.6	0.64	2.49	0.99	0.93	0.29	19.5	12.67	13
0018	female	2	36	77.6	159	30.7	102	102	106	106	0.962264	0.962264	111.5	39	5.36	8.79	63.1	27.9	5.5	3.1	0.4	5.55	148	44.8	83.4	27.7	332	42.3	13.8	269	8.7	0.234	15.9	3.56	139.9	102.6	23.4	5.69	3.96	53	440	0.9	2.28	0.81	0.94	0.3	16.4	10.15	13.2
0019	male	1	18	120.4	179.8	37.2	119	119	122	122	0.97541	0.97541	120	47	3.08	6.1	61.4	33.4	4	1.1	0.1	3.74	159	48.1	88.1	29.1	331	40.1	12.4	161	10.5	0.169	16.3	3.86	136.8	104.1	22.2	4.85	4.92	71.7	411.6	0.84	2.45	0.98	0.85	0.3	15.6	9.51	15.3
0020	male	1	16	132.8	172.4	44.7	133	133	134	134	0.992537	0.992537	132.5	45.5	12.51	7.61	72.9	22	4.8	0.1	0.2	5.54	154	45.5	87.9	29.8	340	38.4	11.9	271	9.6	0.26	16	3.87	139.8	105.5	24.6	4.21	3.79	56	477	0.77	2.255	1.13	0.9	0.27	15.3	7.7	19.1
0021	male	1	43	148.1	179.7	45.9	142	142	138.5	138.5	1.02527	1.02527	135.5	49.5	17.52	10.66	66.8	27.6	4.5	0.9	0.2	7.12	160	47.6	86.9	29.2	336	40.2	12.5	242	9.1	0.219	15.8	3.56	140	101	21.5	10.43	3.39	65	431	0.71	2.06	0.54	0.88	0.3	17.5	8.15	21.2
0022	female	2	23	161.6	170.6	55.5	157.5	157.5	160.5	160.5	0.981308	0.981308	141.5	41	23.69	8.32	65.7	24.7	6.4	2.9	0.3	5.47	142	42.1	83.2	28	337	39.7	12.9	281	9.3	0.263	15.9	3.81	137.5	101.8	24.9	4.8	4.26	47.7	713	1.01	2.35	1.17	0.81	0.31	18.3	8.84	18.5
0023	female	2	29	94.2	159.5	37	117.5	117.5	117.5	117.5	1	1	116.5	42	9.49	9.26	53	36	5.3	4.9	0.8	4.92	137	41.1	78.1	26.1	333	37.3	12.9	268	8.8	0.237	16.4	3.74	134.4	99.4	23.2	9.42	4.11	41.6	474.6	0.92	2.37	1.3	0.82	0.31	17.2	8.15	17
0024	female	2	31	93.6	160.3	36.4	105	105	116	116	0.905172	0.905172	112.5	38	2.02	4.98	64.7	28.5	5.1	1.2	0.5	3.23	144	44.7	84.2	27.1	322	38.6	12.5	219	9	0.198	16.3	3.99	133.4	102.2	22.3	10.95	5.12	43.7	372.3	0.68	2.35	1.05	0.77	0.29	16	8.46	23.2
0025	male	1	41	150.2	171.7	51.3	146	146	144	144	1.01389	1.01389	134.5	47	7.9	7.28	65.7	28	5.3	0.8	0.2	4.78	154	45.4	88.2	29.9	338	39.5	12.1	275	8.3	0.228	15.7	3.94	136.8	102.8	26.4	5.42	4.6	64.6	414.7	0.96	2.45	1.06	0.74	0.33	18	8.07	17.4
0026	female	2	38	90.5	155.6	37.4	103	103	119.5	119.5	0.861925	0.861925	108	38.5	29.89	7.73	60.8	30.7	5.3	2.8	0.4	4.7	147	44.2	85.4	28.5	333	38.7	12.2	265	8.7	0.23	15.6	3.51	136.4	97.3	22.3	5.35	2.52	61	382	0.87	2.2	1.07	0.83	0.32	22	10	13.8
0027	male	2	45	137.1	180.6	42	130.5	130.5	136	136	0.959559	0.959559	125	53	6.03	8.47	57.7	34.8	5.8	1.4	0.3	4.88	160	48.5	90.8	29.9	330	42.7	12.8	227	9.3	0.211	16.1	4.19	137.8	104.7	21.5	7.77	4.17	67	558.4	0.87	2.38	1.22	0.8	0.3	16	9.48	20.7
0028	male	1	39	99.9	169.3	34.9	113	113	113	113	1	1	117	44	2.15	7.1	48.2	41.4	5.8	3.9	0.7	3.42	166	49.1	90.7	30.7	339	41.5	12.5	209	8.6	0.179	15.9	3.69	139.3	103.8	23.3	5	2.43	63.7	319.2	1.04	2.35	1.23	0.76	0.24	12.2	9.1	20.2
0029	female	2	24	119.6	172	40.4	117	117	127	127	0.92126	0.92126	127	47	4.25	8.64	50.3	42.9	4.4	2.3	0.1	4.34	140	42	85	28.4	334	39.1	12.5	403	8.3	0.33	15.4	3.92	140.5	103.9	23.4	4.8	4.6	42	563	0.91	2.26	1.32	0.84	0.27	15.6	8.3	16.3
0030	female	2	34	110	162	42	111.5	111.5	130	130	0.857692	0.857692	117	40.5	12.85	8.23	61	31	5.6	1.7	0.7	5.02	125	39	66.5	21.2	319	36.8	15	288	10.8	0.31	15.7	4.3	138.9	106.1	21.4	4.92	3.96	58.2	506.8	1.07	2.2	0.85	0.94	0.26	13.1	8.47	16.3
0031	female	2	24	102.2	168.5	36	118.5	118.5	119.5	119.5	0.991632	0.991632	120	39	9.79	6.71	64.2	30.5	3.8	1.1	0.4	4.31	142	42.6	86.9	29	334	36.7	11.5	296	10.3	0.305	16	4.17	141.3	104	23.8	5.14	5.1	63.1	423.2	0.73	2.42	1.14	0.93	0.46	31.9	11.85	28
0032	female	2	68	79.6	150.7	35	115	115	125	125	0.92	0.92	108	39.5	3.62	8	53.6	38	6.1	1.7	0.6	4.28	133	41.7	90.5	28.8	318	45.5	13.6	218	10.9	0.237	16	4.04	138.4	104.7	20.7	7.37	6.67	69.1	560	1.22	2.4	1.32	0.71	0.3	16	7.19	14.2
0033	female	2	14	103.4	158	41.4	116	116	127.5	127.5	0.909804	0.909804	113.5	45	8.19	7.76	44.4	45.4	5.8	3.6	0.8	3.45	136	43.5	67.4	21.1	313	34.7	14	328	8	0.283	15.4	4.42	141.4	102.4	25.1	4.43	5.54	76	724	1.6	2.54	1.53	0.88	0.32	19.7	11.5	24.7
0034	female	2	31	76.4	156.2	31.6	97	97.5	113	113	0.862832	0.858407	98	36	6.36	6.89	60.3	32.2	5.7	1.6	0.2	4.16	144	44.4	87.3	28.3	324	42.4	13.2	329	8.9	0.294	15.7	4.25	137.6	104.1	23	4.47	4.12	54.7	322.8	0.84	2.37	1.18	0.86	0.31	15.9	10.31	16.3
0035	female	2	30	78.9	161.2	30.4	104	104	109	109	0.954128	0.954128	108	37	2.59	6.56	60.6	30.7	6.7	1.5	0.5	3.98	148	45.6	93.6	30.3	324	44.6	12.9	255	9	0.229	15.6	4.26	138.7	103.1	22.3	8.67	4.68	47.7	418.9	0.73	2.45	1.06	0.91	0.278	13.1	8.31	22.5
0036	female	2	18	80.8	158.6	32.1	100	100	111.5	111.5	0.896861	0.896861	110	41	11.55	6.48	60.4	32.1	6.1	0.9	0.5	3.91	141	43.9	89.8	28.9	322	43.5	13.2	277	9.2	0.255	15.5	4.2	140.4	106	23.9	4.47	4.67	58.3	401.7	0.78	2.32	1.09	0.94	0.34	19.7	8.27	29.1
0037	male	1	25	120.4	172.4	40.5	128.5	128.5	122	122	1.05328	1.05328	124.5	46.5	6.79	7.45	49.4	42.1	5.3	2.7	0.5	3.68	160	49.4	87.3	28.2	323	42.1	13.1	199	11.3	0.224	16.7	3.92	139	105.5	21.6	4.72	2.59	55.9	441	0.82	2.22	1.47	0.89	0.27	14.6	8.08	13.8
0038	male	1	29	118.6	186.2	34.2	124	124	118	118	1.05085	1.05085	125	44	18.73	8.34	66.8	25.6	4.8	2.4	0.4	5.57	160	46.6	85.1	29.2	343	37.5	11.9	192	10.3	0.197	16.5	3.95	135.9	100.9	26.5	15.07	5.28	54.7	431.1	0.71	2.34	1.2	0.87	0.34	22.3	8.37	11.1
0039	male	1	42	125.6	173	42	130.5	130.5	127	127	1.02756	1.02756	127.5	48.5	3.98	6.51	66	27.7	3.6	2.2	0.5	4.31	167	50.3	94.5	31.4	332	42.7	12.3	174	9.6	0.168	16.4	4.25	135.6	101.8	26.1	6.48	4.52	85.4	478.9	1.06	2.31	0.72	0.76	0.25	12.5	7.62	31.4
0040	female	2	42	87.9	158.3	35.1	114	114	112	112	1.01786	1.01786	109.5	38.5	12.35	4.11	73	18.6	7.2	0.9	0.3	3	142	42.8	93.4	31	332	42.7	12.4	165	8.6	0.143	16.1	3.7	143.7	103.4	25.5	4.87	3.8	48	323	0.95	2.06	1.41	0.76	0.12	17.3	6.2	21.3
0041	male	1	21	141.3	170.6	48.5	133	133	140	140	0.95	0.95	131	44	12.23	7.98	66.2	27.4	5.2	1	0.2	5.28	148	45.5	88.3	28.6	324	41.9	12.9	254	10.5	0.266	16.3	4.24	143.6	105.8	23.2	5.4	2.76	60	412	1.01	2.3	1.1	0.9	0.12	16.4	8.5	20.2
0042	male	1	24	91.9	165.7	33.5	98	98	108.5	108.5	0.903226	0.903226	106	40	11.88	8.99	65	25.6	5.3	3.6	0.5	5.85	180	53	90.7	30.7	339	40.3	12.1	202	9.3	0.188	16.2	3.95	139.7	104.4	21.7	5.89	4.22	92.9	547.4	1.18	2.43	1.34	0.85				16.4
0043	male	1	32	186.6	171.2	63.7	177	177	163	163	1.08589	1.08589	166	55.5	33.05	7.04	55.6	37.5	5.0	1.6	0.3	3.92	155	49.3	87.4	27.5	315	41.1	12.8	235	9.9	0.232	16.3	3.96	135.7	99.3	23.2	5.64	3.62	44.2	524	0.76	2.22	1.08	0.77	0.33	19.7	7.77	17.6
0044	female	2	20	99.88	162.3	37.9	121	121	117.5	117.5	1.02979	1.02979	125.5	41.5	11.73	8.54	61.1	30.8	5.5	2.4	0.2	5.22	127	38.1	84.5	28.2	333	39	12.5	277	11.1	0.307	16.2	4.01	139.4	102.8	25	4.48	5.56	51.7	440.6	0.92	2.27	1.62	0.96	0.3	17.3	7.99	16.2
0046	female	2	28	132.4	166.4	47.8	120	120	137.5	137.5	0.872727	0.872727	118	42	7.24	9.47	54.9	38.2	4.3	2.2	0.4	5.19	159	48.7	93.8	30.6	326	43	12.4	287	9.7	0.279	15.9	4.33	138.9	103.9	24.6	4.39	3.31	56.7	424.2	0.95	2.39	1.17	0.9	0.29	17.4	8.19	24.7
0047	female	2	20	91.4	170.3	33.6	110	110	119	119	0.92437	0.92437	112.3	34	0.39	7.01	52.9	36.3	5.9	4.6	0.3	3.72	137	42.1	92.1	29.9	325	45.3	13.4	192	8.9	0.17	15.7	3.99	136.1	107.4	20.8	4.61	3.79	58.3	374.8	0.76	2.27	1.06	0.86	0.28	16.4	8.88	16.9
0048	female	2	26	91.1	167.1	32.6	99	99	119.5	119.5	0.828452	0.828452	108	37	3.29	5.69	55.3	31.4	6.8	6.2	0.3	3.14	143	44	88.1	28.6	324	42.7	13.2	269	9.8	0.264	16.1	3.87	140.4	104.7	25.5	4.88	5.05	67.6	413	0.98	2.42	1.15	0.94	0.28	15	8.84	15
0049	female	2	23	112.3	162	42.8	130.5	130.5	133.5	133.5	0.977528	0.977528	127.5	41	13.99	7.72	55.2	36.7	5.5	2.4	0.2	4.26	138	42.9	84.3	27.1	321	39.3	12.6	429	8.3	0.356	15.7	4	136.5	102.7	24.2	6.21	4.32	32.5	500.2	0.83	2.24	1.2	0.87	0.33	20.7	9.16	20.2
0050	female	2	25	88.5	162.7	33.6	105.5	105.5	112	112	0.941964	0.941964	112.5	36.5		5.68	70.6	18.8	9.7	0.7	0.2	4.01	133	39.1	91.6	31.1	340	44.9	13.5	202	10.7	0.22	11.9	4.36	138	102	22.8	5.56	4.56	51.1	429.7	0.88	2.5	1.15	0.98	0.34	20.5	11.01	20.1
0051	female	2	40	88.3	167.9	31.3	104	104	112.5	112.5	0.924444	0.924444	112	37.5	4.09	4.46	51.3	36.3	5.8	5.8	0.8	2.28	137	43.1	95.5	30.4	318	45.5	12.9	227	8.2	0.187	15.6	3.99	139.5	105.4	22.1	5.23	4.9	51.7	371.2	0.83	2.25	1.03	0.86	0.35	23	9.04	17.6
0052	female	2	40	73.8	161.7	28.7	87.5	87.5	109.3	109.3	0.800549	0.800549	102.5	35	2	7.77	58	35.4	4.1	2.2	0.3	4.51	134	41.7	92.2	29.6	321	47.1	13.8	253	10	0.253	16.4	4.32	136.2	104.2	21.6	5.24	5.78	46.8	231.5	0.69	2.27	1.18	0.82	0.16	16.4	11.69	11.5
0053	female	2	39	80	159	31.6	105	105	111	111	0.945946	0.945946	106.7	36	3.1	5.85	63	28.1	7	1.4	0.5	3.69	126	38.8	87.6	28.4	324	41.3	12.8	216	9.8	0.211	15.9	3.79	138.7	107.4	23.1	4.66	4.02	51.7	281.3	0.79	2.19	1.04	0.98	0.3	15.5	7.66	14.2
0054	female	2	18	93.6	157.2	37.7	109	109	130	130	0.838462	0.838462	111	34	13.93	10.2	54.9	37.3	6.2	1.1	0.5	5.61	135	41.2	80.9	26.5	327	42.4	14.2	345	9	0.31	15.9	4.3	137.8	99.5	22.7	4.37	4.04	64	499	1.14	2.21	1.35	0.76	0.31	17.6	7.6	10
0055	female	2	37	95.3	163.4	35.7	108.7	108.7	111.5	111.5	0.974888	0.974888	113.5	38.5	2.36	7.55	59.8	33.4	4.8	1.5	0.5	4.52	135	40	91.6	30.8	337	46.6	13.9	362	8.6	0.31	15.7	3.68	136.3	99.9	22.9	4.89	3.18	51	359	1.22	2.15	0.96	0.84	0.26	13.6	8.53	9
0056	male	1	28	123.9	174	40.9	125	125	124.5	124.5	1.00402	1.00402	125	44.5	2.01	8.23	48.7	39.8	6.3	4.7	0.5	4	151	46	89.9	29.5	329	43.9	13.3	370	8	0.294	15.4	4.33	140.4	108.2	21.5	4.57	5.32	77.9	498.7	1.22	2.26	1.53	0.86	0.23	12.2	9.1	26
0057	male	1	31	155.8	176	50.3	155.5	155.5	135.5	135.5	1.1476	1.1476	142.5	48.5	14.81	9.67	60.4	30.4	5.3	3.4	0.5	5.84	152	48.3	84.6	26.7	315	46.2	14.9	328	10.3	0.336	16.3	4.24	137.6	101.6	27.5	4.64	5.28	69	554	1.43	2.3	1.42	0.8	0.34	21.6	8.07	11.8
0058	male	1	22	99.2	163.7	37	111.5	111.5	115.5	115.5	0.965368	0.965368	115.5	45.5	7.59	6.51	57.5	32	8.6	1.4	0.5	3.75	152	45.3	84.5	28.3	335	38.4	12.3	278	9.2	0.257	16	4.02	141.6	101	25.5	4.17	4.01	65	502	0.97	2.35	0.93	0.97	0.33	20.3	9.74	19.6
0059	female	2	47	76.3	151.3	33.3	104.5	104.5	105	105	0.995238	0.995238	111	39.5	12.79	10.37	75.8	19.8	3.2	0.8	0.4	7.87	124	40.3	67.2	20.7	308	35.5	14.3	267	10.2	0.273	15.8	3.86	138.8	103.6	26.2	4.97	3.81	42.3	370	0.91	2.24	1.05	0.88	0.35	23.7	7.07	9.2
0060	female	2	39	122.8	153.6	52	133	133	146	146	0.910959	0.910959	126	44	13.69	6.35	68.5	21.2	6.2	3.3	0.8	4.35	144	45	89.7	28.7	320	47.7	14.5	278	10.3	0.288	15.9	3.94	137.6	101.6	22	5.33	3.5	48.5	622	0.99	2.19	1.12	0.85	0.31	18.7	7.81	18.9
0061	male	1	30	152.2	177.9	48.1	142	142	142	142	1	1	142	47	7.63	7.89	66.4	25.2	5.7	2.2	0.5	5.24	169	51.9	93.6	30.6	326	43.2	12.5	202	11	0.223	16.5	4.19	139.2	106.8	21.9	4.91	4.05	69.5	806	1.32	2.33	1.11	0.85	0.28	16.3	7.28	15.4
0062	female	2	17	128.5	169.2	44.9	141.8	141.8	131.7	131.7	1.07669	1.07669	133.5	41	9.98	8.22	57.7	32.4	5	4.3	0.6	4.75	150	46.1	84.4	27.4	325	39.5	12.7	215	10.8	0.233	16.2	3.96	137.4	103.3	23.9	4.26	5.26	51.3	494.7	0.94	2.29	1.1	0.87	0.41	18.1	9.87	22.9
0063	male	1	54	105.4	177.5	33.5	123	123	120.7	120.7	1.01906	1.01906	119	44	1.03	5.1	60.4	30.7	6.4	2.1	0.4	3.07	151	45.2	93.4	31.2	335	40.5	11.7	170	9.6	0.163	16.2	4.43	139.2	106.8	24	8.45	5.4	73.6	352.9	0.71	2.25	1.01	0.83	0.33	13.2	10.04	20.5
0064	male	1	23	121.5	169.3	42.4	136	136	135	135	1.00741	1.00741	121.9	44.5	3.36	5.62	64.9	28.7	5.3	1	0.1	3.64	170	51.9	83.2	27.2	327	40.7	13.3	211	9.1	0.192	15.9	4.02	137.4	103.6	25.5	4.38	3.94	69.9	550.1	0.87	2.26	1.01	0.77	0.36	14.4	9.29	21.5
0065	female	2	33	84.4	152.3	35.1	106	106	108.3	108.3	0.978763	0.978763	114	38	2.84	7.47	60.9	31.7	5.3	1.6	0.5	4.54	149	46	89.2	29	325	40.6	12.4	277	9.5	0.264	16	4.1	137.2	107.1	19.7	5.01	3.2	47.7	391.1	1.05	2.22	1.17	0.8	0.37	16.8	6.45	14.6
0066	female	2	21	145.1	170	50.2	142	142	148.5	148.5	0.956229	0.956229	142	46	16.1	7.6	52.7	37	4.3	5.1	0.9	4	152	46.5	87.4	28.6	327	39	12.1	296	9.9	0.294	16.1	3.84	138.2	103.6	24.1	8.32	3.56	42.4	357.5	1.13	2.42	1.51	0.86	0.4	19.3	9.21	20.5
0067	male	1	18	107.8	176.3	34.7	116.5	116.5	121.5	121.5	0.958848	0.958848	110	44.5	1.72	6.9	44.8	41.8	6.1	6.7	0.6	3.1	179	53	88	29.7	338	41.2	12.7	331	8.3	0.273	15.7	4.32	141.4	100.9	23.6	5.52	4.34	72	446	1.23	2.43	1.7	0.89	0.25	13.7	10.4	17.7
0068	male	1	22	134.3	172.2	45.3	140.5	140.5	140	140	1.00357	1.00357	130.5	44.5	5.37	11.97	63.95	28.3	5.11	2.28	0.36	7.66	155.1	46.62	90.18	30.01	332.8	41.13	13.02	327.9	8.26	0.3	15.5	4.12	138.1	103.2	22.2	4.03	4.11	64	555.6	1.07	2.38	1.25	0.83	0.35	19.2	8.68	18.1
0069	female	2	40	78.6	162.2	30	121	121	136.5	136.5	0.886447	0.886447	129.5	40.4	2.58	6.48	59.45	28.53	8.74	2.93	0.35	3.85	136.6	41.26	88	29.13	331.1	39.38	12.8	173.8	11.9	0.186	16.4	4.11	138	106.5	22.1	5.15	3.74	46.6	321	0.74	2.28	1.17	0.75	0.35	17.4	6.57	16.4
0070	female	2	30	122.9	165.9	44.7	121	121	136.5	136.5	0.886447	0.886447	129.5	40.4	11.81	10.67	69.7	23.98	5.16	0.89	0.27	7.44	142.9	43.69	87.7	28.68	327	40.69	13.14	267.8	8.91	0.229	15.9	3.41	138.7	101.7	24.2	7.46	2.95	40.2	413.1	0.89	2.21	0.79	0.79	0.38	20.6	8.37	24.9
0071	female	2	20	134	172.3	45	131	131	136.5	136.5	0.959707	0.959707	134.5	46.5	22.28	8.25	59.9	33.3	4.8	1.5	0.5	4.94	126	39.7	88.4	28.1	318	43.9	13.5	331	8.6	0.284	15.8	3.8	137.1	106.5	21.2	5.83	5.85	54	436.9	1.25	2.32	1.55	0.87	0.37	20.8	6.97	13.9
0072	female	2	37	109	162.1	41	112.7	112.7	132.6	132.6	0.849925	0.849925	125.5	38.8	9.61	10.54	74.9	18	5.6	1.3	0.2	7.89	137	42	84.6	27.6	326	41.6	13.3	309	9.3	0.287	15.7	4.15	137.3	105.6	23.2	5.52	4.47	51.6	340.8	0.73	2.22	0.96	0.85	0.33	18.1	7.87	8.9
0073	male	1	41	111.1	175.8	35.9	125.5	125.5	109.5	109.5	1.14612	1.14612	117	46.5	3.3	9.25	61.1	29.9	6.3	2.1	0.6	5.65	155	49.4	81.5	25.6	314	42.5	14.1	238	10.7	0.255	16	4.37	138.9	105	23.3	5.96	5.33	63.1	397.6	0.99	2.4	1.09	0.89	0.29	14.8	8.59	15
0074	female	2	23	89.5	162.2	34.1	101	101	113	113	0.893805	0.893805	110.5	40	5.58	5.51	48.2	44.5	5.6	1.5	0.2	2.66	146	43.5	88.7	29.8	336	39.1	11.9	241	9.3	0.224	16	3.9	138.2	103.7	22.3	4.45	5.49	82.4	568.6	1.1	2.35	1.4	0.92	0.3	19.5	12.6	15.2
0075	male	1	27	141.2	170.1	48.8	147.8	147.8	127.5	127.5	1.15922	1.15922	138	47	8.39	6.85	52.9	38.8	5.7	2	0.6	3.62	157	46.7	89.9	30.2	336	39.5	11.9	156	10.8	0.169	16.5	4.08	136.1	100.4	24.7	11.96	5.49	50.6	259.7	1.11	2.29	1.4	0.78	0.26	11	9.14	18
0077	female	2	20	103.6	164.7	38.2	121.2	121.1	121	121	1.00083	1.00165	114.3	41.5	5.51	6.99	58.2	33.9	3.9	3.4	0.6	4.07	131	40.2	82.3	26.7	325	38.4	12.6	236	10.2	0.24	16.2	3.83	140.2	106.8	24.4	4.79	4.34	52.4	464.1	0.75	2.25	1.24	0.91	0.36	2.25	9.32	24.8
0080	male	1	16	131.6	177.2	41.9	132.5	132.5	130	130	1.01923	1.01923	126	46	5.67	6.98	55.2	38.5	5	0.9	0.4	3.85	143	44.3	86.7	28.1	323	40.6	12.7	221	9.9	0.219	15.7	4.28	140.2	104.2	25.4	4.65	5.33	77.3	600.6	1	2.39	1.43	0.92	0.34	16.7	8.77	29.9
0081	female	1	44	92.9	153.8	39.3	116	116	115	115	1.0087	1.0087	119	42	4.33	6.36	56.5	37	3.6	2.4	0.5	3.6	123	37.4	82.4	27.1	330	37.6	12.3	263	10.2	0.269	15.7	4.04	143.1	104.1	23	5.7	3.18	47	350	1.05	2.29	1.14	0.78	0.36	19.9	6.85	10.6
0082	female	2	36	77.9	159.1	30.8	114	144	108	108	1.33333	1.05556	112.5	37.5	3.01	8.82	69.7	20.4	6	3.4	0.5	6.15	138	40.2	96.3	33.2	345	41.8	11.8	287	8.5	0.245	15.5	3.53	140.9	103.9	22.1	5.11	3.32	49	435	0.74	2.19	1	0.76	0.2	5.6	8.9	16
0083	male	1	17	152.7	177.9	48.2	151	151	139.5	139.5	1.08244	1.08244	135	47	5.3	6.26	60.6	29.3	6.4	3.4	0.3	3.8	159	48.8	92.3	30.1	326	41.4	12.2	334	9.5	0.318	15.8	4.17	138.9	101.2	23.8	5.4	3.53	53.4	625.8	1.05	2.54	1.45	0.92	0.31	18.6	10.45	22.3
0084	male	1	15	129	181.3	39.2	133.5	133.5	125	125	1.068	1.068	129.5	46.5	0.9	7.19	57.7	31.7	8.4	1.8	0.4	4.15	168	50.5	89.5	29.5	332	39.9	12.1	221	11.6	0.255	16.5	3.96	136.6	104.3	20.9	4.14	3.48	66	583.1	0.87	2.4	1.14	0.79	0.28	15.6	8.78	23.9
0085	male	1	30	115.7	176.3	37.2	125.6	125.6	119.7	119.7	1.04929	1.04929	118	45.5	1.94	6.24	59.2	31.8	6.1	1.9	1	3.7	159	47.3	86.5	29.1	337	39.9	12.5	288	9.7	0.28	16.1	3.83	139.2	104.1	22	8.65	4.58	73	503	0.99	2.02	0.82	0.73	0.25	9.6	10.7	21.2
0086	female	2	40	70.3	157.3	28.3	92.8	92.8	107.2	107.2	0.865672	0.865672	102.2	35.8	1.84	5.66	60.2	31.5	5.2	2.4	0.7	3.41	135	41.9	93	30	323	41.8	12.2	171	10.3	0.177	16	4.35	139.6	102.4	25	6.26	4.3	51	313	0.98	2.21	1.15	0.8	0.28	12.4	7.5	16.9
0087	female	1	41	122.9	165.9	44.7	121	93.8	136.5	107.1	0.875817	0.886447	129.5	40.4	4.81	8.61	65.5	25.8	4.5	3.7	0.5	5.64	139	43.6	87.7	27.9	318	42.0	13.0	242	9.7	0.235	16.1	4.29	139.0	102.4	23.4	5.43	6.21	55	424	1.03	2.23	0.93	0.76	0.150	4.4	7.2	10.4
0088	male	1	14	113.6	165.2	41.6	122.5	122.5	126.5	126.5	0.968379	0.968379	115.5	42	6.96	7.19	52.4	35.9	7.1	4.3	0.3	3.77	140	44.7	66.7	20.8	312	36.9	14.9	315	9.5	0.301	15.7	4.72	137.3	99.1	24.6	5.85	5.11	60	371	1.25	2.34	1.47	0.85	0.35	20.7	8.6	14.8
0089	female	2	33	82.6	166.3	29.9	103	103	111	111	0.927928	0.927928	108	36	1.95	5.66	61	29.7	6.7	1.8	0.8	3.45	137	41.8	89.2	29.3	329	41.3	12.5	184	10.6	0.195	16.2	3.78	140.1	103.3	23.6	4.92	4.69	51	356	0.91	2.25	0.8	0.84	0.29	13.3	10.2	24.8
0090	female	2	40	79.9	167	28.6	97	97	107	107	0.906542	0.906542	105.5	39	4.06	6.57	56.5	35.7	4.6	2.8	0.4	3.71	137	41.9	90.9	29.6	326	41	12.2	178	10.4	0.184	16.4	3.82	134.6	101.9	22.4	11.15	5.5	43.4	413.4	0.77	2.03	0.92	0.71	0.24	16.6	7.68	9
0091	female	2	41	74.6	158	29.9	100.5	100.5	104.7	104.7	0.959885	0.959885	105.4	37	6.97	7.23	62.9	31	4.3	1.2	0.6	4.55	148	44.4	85.5	28.5	333	38.2	12.1	277	10	0.278	15.8	3.95	136.2	100.5	20.7	15.72	5.21	41	236	0.83	2.14	0.77	0.82	0.32	16.9	9.8	9.6
0092	male	1	27	114.7	170	39.7	127.5	127.5	120.5	120.5	1.05809	1.05809	120	48.3	13.49	8.89	66.2	25.7	4.7	3	0.4	5.88	160	49.1	86.1	28.1	326	39.1	12.3	253	11.2	0.284	16.6	3.93	139.3	103.4	23.8	6.51	5.9	73	492.5	1.67	2.26	1.13	0.8	0.28	18.2	6.95	25.1
0093	female	2	39	92.2	164.3	34.2	111	111	114.5	114.5	0.969432	0.969432	113	38.8	2.47	6.26	57.2	35.3	4.9	2.1	0.5	3.58	121	39.3	64.6	19.9	308	38	16	309	10.6	0.329	16.2	4.14	135.5	104.6	22.4	6.24	5.25	55.8	423.1	0.91	2.22	0.98	0.87	0.3	20.8	7.12	13.4
0094	female	2	26	81	153.3	34.5	94	94	107	107	0.878505	0.878505	107.8	41.5	1.69	5.59	51.9	39	6.1	2.6	0.4	2.9	133	39.1	86.1	29.2	339	38.6	12.1	205	9.6	0.197	16.5	3.94	138.8	106.2	23.9	5.14	7.52	53.2	564.7	1.2	2.35	1.22	0.87	0.33	15.2	9.8	20.2
0095	female	2	61	92.3	159.5	36.3	125	125	118	118	1.05932	1.05932	118.5	39	2.08	7.64	62.8	28.7	5.7	2.7	0.1	4.79	163	50	93.6	30.5	326	44.8	13	286	10	0.287	16.3	2.64	136.2	90.9	28	9.02	10.16	50	410	1.29	2.57	1.57	0.96	0.36	17.5	10.5	16.2
0096	male	1	30	136.7	176.8	43.7	140.5	140.5	131	131	1.07252	1.07252	132	46.5	9.61	10.18	73.8	19.3	4.2	2.3	0.4	7.52	149	44.8	92.4	30.7	332	42.5	12.4	208	10.3	0.215	16.3	4.08	141.9	106.4	23.7	6.13	6.66	75.3	632.7	1	2.35	1.19	0.9	0.32	16.2	7.63	16
0097	female	2	29	77.2	164.4	28.6	99.5	99.5	109	109	0.912844	0.912844	111	37.7	4.26	10.28	51.8	41.4	4.6	1.5	0.7	5.33	143	43.6	83.4	27.5	329	40.9	13.3	322	8	0.258	15.5	4.06	139.2	103.9	24.3	5.06	4.91	53.7	461	0.76	2.27	1.43	0.81	0.33	17.4	7.19	10.1
0098	male	1	31	144.7	181.4	44	133.2	133.2	133	133	1.0015	1.0015	128.5	45	5.62	7.97	61.8	23	6.5	8.2	0.5	4.93	142	43.1	86.8	28.6	330	39.6	12.4	325	9.8	0.318	16	3.95	140.1	103.5	23.8	4.72	5.45	78	583	1.27	2.26	1.14	0.93	0.35	16.4	11.1	12.3
0099	male	1	21	147	181.1	44.8	140	140	133.5	133.5	1.04869	1.04869	131.5	49	3.43	8.99	53.6	38.6	4.7	2.2	0.9	4.82	179	55.8	83.5	26.9	322	44	14.4	277	10.2	0.284	16.1	4.1	140.6	104.2	22.8	4.18	4.38	68.9	591.2	0.84	2.43	1.24	0.86	0.29	15.3	9.9	16.9
0100	male	1	31	197.7	179.3	61.5	166.5	162	158	166	0.975904	1.0538	146.5	53.5	15.68	6.94	65.4	25.6	6.5	2.1	0.4	4.53	146	46.7	84.1	26.3	312	44.1	14.3	283	9.5	0.269	16.1	4.18	137.7	97.9	29.1	9.71	2.6	63.7	560	0.98	2.27	1.4	0.77		23.6	7.7	10.1
0101	male	1	30	106.7	171.8	36.2	118.5	118.5	115	115	1.03043	1.03043	108.5	45	7.01	7.71	56.5	36	5.3	1.8	0.4	4.35	165	48.6	81.6	27.6	340	38.2	12.7	312	9.5	0.298	16	4.17	136.8	100.7	21.3	5.16	6.2	74.7	507	1.12	2.54	1.36	0.85	0.28	16.8	9.12	18.3
0102	male	1	15	121.7	187.8	34.5	115	115	122	122	0.942623	0.942623	117	41.5	32.54	14.07	89.02	7.8	2.8	0.1	0.1	12.56	149	43.1	82.6	28.5	345	38.8	12.7	308	8.3	0.257	15.7	4.3	138.3	101.6	22.8	4.56	5.2	64.1	569.5	1.23	2.45	1.59	0.8	0.29	15.8	9.32	20.5
0103	female	2	39	78.1	154	32.9	107.5	107.5	108	108	0.99537	0.99537	105	37	6.29	8.22	65.9	26.1	4.4	3.2	0.4	65.9	137	41.3	92.1	30.4	331	41.8	12.3	328	9.1	0.298	15.5	4.16	135.8	104.1	17.2	4.91	3.27	43.7	364.6	0.92	2.15	1.03	0.8	0.29	15.6	7.44	23.8
0104	female	2	62	95.7	149.2	43	140.5	140.5	136.7	136.7	1.0278	1.0278	120.7	31.5	7.37	9.83	65	26.6	6.7	1.4	0.3	6.39	119	39.4	70.5	21.4	303	36.5	14	284	9.6	0.272	15.9	3.47	142	106.6	24.2	4.33	5.3	45	346	1.46	2.02	1.23	0.84	0.4	22.5	8.9	6.7
0105	female	2	32	78.7	159.6	30.9	104	104	107	107	0.971963	0.971963	107.5	36.7	1.63	5.42	55.6	36.9	5.5	0.9	1.1	3.01	136	41.2	91.2	30.2	331	38.9	11.6	241	10.3	0.248	16	3.89	138.9	105.1	21.8	4.94	5.11	48.1	317.9	0.69	2.33	1.12	0.81	0.27	11.3	7.66	11.5
0106	male	1	41	108.3	169.2	37.8	128	128	121.5	121.5	1.0535	1.0535	122.2	45.5	5.88	7.53	54.8	33.5	4.1	7	0.6	4.12	151	45.9	87.5	28.7	329	43	13.4	206	10.3	0.213	16.4	3.45	139.4	105.3	24.7	5.13	6.8	81.2	585	1.17	2.23	1.19	0.89	0.3	16.3	6.99	12.5
0107	male	1	66			25.3					#DIV/0!				2.73	5.69	53.7	37.4	6.8	1.7	0.4	3.05	174	52	88.2	29.5	334	41.1	12.6	195	10.2	0.198	16.3	3.59	139.5	105.3	24	10.24	6.91	56.3	330.7	1.08	2.3	1.13	0.87	0.28	12.6	8.24	18.8
0108	male	1	39	104.5	179.2	32.4	112.6	112.6	112.1	112.1	1.00446	1.00446	109.9	45.2	3.33	6.29	57.5	31.4	8.7	1.8	0.6	3.61	166	49.2	93.8	31.7	338	42.2	12.2	178	10.7	0.191	16.7	3.87	136.5	103	21.9	7.78	6.71	39.3	456.5	0.89	2.44	1.45	0.86	0.15	7.1	18.6	16.6
0109	male	1	55	103.5	180.7	37.1	118	118	114.6	114.6	1.02967	1.02967	113	47.4	2.53	4.92	46.2	44.7	7.5	0.9	0.7	2.28	157	48.4	88.1	28.6	325	43.6	13.5	158	10.1	0.159	16.2	3.85	135.8	103.7	23.5	9.01	6.05	48	392.1	0.77	2.27	1.33	0.79	0.29	16	7.89	13
0110	female	2	29	104.1	160.2	40.6	118	118	122	122	0.967213	0.967213	119	38	13.35	7.6	53.38	35.6	7.1	3.2	0.3	4.09	131	39.2	87.9	29.3	333	42.7	13.2	322	9.4	0.303	15.8	3.84	138.1	102.2	24.1	5.77	4.36	62	532	0.76	2.3	1.22	0.9	0.33	12.6	7.5	20.2
0111	female	2	41	134.7	169.2	47.1	92.8	93.8	105	105	0.893333	0.88381	100	36.8	0.02	5.35	37.1	49.3	7.5	5.4	0.7	1.98	116	38.5	77.4	23.3	301	45.7	16	268	9.8	0.262	16	3.99	136.9	102.9	23.7	4.65	4.14	50	234	0.81	2.19	0.89	0.83	0.27	13.6	6.17	6.8
0112	male	2	45	81.1	159.6	31.8	98.7	99.5	105	105	0.947619	0.94	119.2	37.5	0.89	5.16	60.1	34.3	4.4	0.8	0.4	3.1	146	42.9	86.5	29.5	341	38.1	11.9	249	9.1	0.227	15.8	3.34	138.9	99.2	28.2	5.43	5.94	53.2	453.2	0.74	2.37	1.13	0.73	0.36	24.2	7.94	23.5
0113	female	2	30	75.9	165.9	29.6	102.5	102.5	103.5	103.5	0.990338	0.990338	110	36	2.46	9.69	60.7	32.1	4	2.8	0.4	5.88	144	41.7	85.8	29.6	345	36.3	11.4	309	9	0.277	15.9	4.11	136.1	96.7	24	10.67	4.03	51	509	0.8	2.27	1.11	0.76	0.36	19.9	7.5	21.5
0114	female	1	33	108.3	170.4	37.2	113.2	111.5	111.6	118	0.944915	1.01434	113.2	47.3	6.35	7.71	55.8	36.2	6.4	1.1	0.5	4.31	162	49.9	87.7	28.5	325	41.4	12.8	240	9.8	0.235	16.1	4.23	139.9	101.7	28.5	5.94	4.16	71.7	507.9	1.01	2.36	1.18	0.82	0.29	16.2	5.69	19.4
0115	male	2	28	134.7	169.2	47.1	139.5	139.5	139	139	1.0036	1.0036	131	43	8.17	7.83	65.1	28.1	4.2	2.1	0.5	5.1	149	44.7	82.1	27.4	334	38.3	12.6	337	8.5	0.286	15.6	3.95	136.1	104.4	21.8	5.87	3.52	53.6	398.7	0.91	2.32	1.23	0.95	0.32	19.7	5.68	15.4
0116	female	2	39	77.9	162.1	29.6	98	98	113	113	0.867257	0.867257	101.5	38	5.08	6.31	62.8	30.2	5.1	1.5	0.4	3.96	140	41.6	86.2	29	336	39.8	12.5	220	9.3	0.204	16	3.91	136.9	103.9	24.1	4.91	4.81	48.3	406.7	0.64	2.34	1.23	0.93	0.29	16.8	5.48	19.8
0117	female	2	42	98.3	168	34.8	128	128	125	125	1.024	1.024	118	38	8.68	8.3	63.8	27.3	4.3	4.1	0.5	5.29	142	43.9	84.8	27.5	324	43.1	13.8	243	11.1	0.27	16.2	4.2	137	105.5	23.4	5.85	4.27	45.2	561.2	0.86	2.34	1.15	0.89	0.34	20.3	5.8	15.5
0118	male	1	25	139.5	180.9	42.6	130.5	130.5	131.5	135.5	0.9631	0.992395	135.8	46	3.98	9.47	64	26.9	5.9	2.8	0.4	6.05	155	46.9	86	28.4	330	41.9	13.2	311	8.3	0.258	15.5	3.97	139.4	105.5	24.8	4.75	5.33	86.9	664.3	1.11	2.33	1.3	0.9	0.28	14.8	6.92	23.5
0119	male	1	36	140.3	183.5	41.7	128	128	127.5	127.5	1.00392	1.00392	130	48	8.6	9.07	54.3	30.6	6.6	7.9	0.6	4.92	144	44.9	91.3	29.3	321	43.4	12.9	239	10.1	0.242	16.1	4.38	139	104.1	22.3	4.7	5.66	69.4	496	0.95	2.26	1.42	0.85	0.31	17.2	5.62	15
0120	female	2	23	97.6	160.4	37.9	111.3	111.3	122	122	0.912295	0.912295	109	41	0.49	9.33	63.9	26.8	7.3	1.5	0.5	5.96	161	46.2	85.8	29.9	348	37.6	11.9	228	10.6	0.241	16.3	4.13	141.2	103.8	21.8	5.64	5.03	47	475	0.96	2.43	1.07	0.91	0.3	14.4	10.8	21.2
0121	female	2	42	99	171.2	33.8	102.5	102.5	116	116	0.883621	0.883621	114.6	38.7	1.09	7.07	64.5	27.6	4.9	1.7	1.3	4.56	145	44.3	88.7	29	326	41.1	12.5	368	9.4	0.345	15.5	4.15	143.2	110.6	23.3	5.49	2.75	56.7	489.6	0.79	2.42	1.12	0.91	0.32	17	6.2	15.3
0122	female	2	34	78.5	155.3	32.5	98.5	98.5	108.5	108.5	0.907834	0.907834	104.5	38	3.32	6.29	67.6	25.5	5.5	0.8	0.6	4.25	144	42.9	84.5	28.3	335	37.8	12.1	315	9.2	0.291	15.9	4.08	138.8	106.1	21	5.23	5.87	60.9	423.5	0.75	2.27	0.98	0.88	0.33	13.9	9.6	18.3
0123	female	2	42	78.4	158.5	31.2	108.5	108.5	111.5	111.5	0.973094	0.973094	110.5	34	9.98	9.06	58.2	32.2	4.5	4.6	0.5	5.26	130	39.8	80.8	26.3	326	40	13.4	253	9.1	0.231	15.8	4.23	139.9	104.4	25	5.72	6.79	42.4	486.2	0.71	2.19	1.28	0.81	0.34	19.3	6.48	16.7
0124	male	1	26	88.1	161.9	33.6	108	108	105.5	105.5	1.0237	1.0237	109.5	43.5	2.57	4.92	49.1	41	6.2	3.3	0.4	2.41	135	40.6	87.2	29.1	334	41.1	12.8	219	10.4	0.228	16.2	4.2	139.5	103.2	25	8.54	3.72	54.5	342.8	0.76	2.28	1.29	0.66	0.28	14.8	6.87	15.4
0125	male	2	29	112.1	170.5	38.6	127.5	127.5	122	122	1.04508	1.04508	125.5	43.8	7.63	8.58	55.5	36.7	4.8	2.3	0.7	4.76	154	45.4	92	31.3	340	41.4	12.2	292	9.3	0.272	15.9	4	138.4	103.8	25.1	4.7	4.77	70	538.5	0.81	2.33	1.24	0.85	0.31	16.6	6.66	31.5
0126	female	2	23	94.8	153	40.5	112.5	112.5	121	121	0.929752	0.929752	120	40.3	7.73	6.59	50.4	41.8	4.2	3.1	0.5	3.33	137	41.6	85.8	28.3	330	41	12.9	295	10	0.295	15.9	3.87	136.6	101.1	25.2	4.13	5.67	50.4	642.9	0.89	2.35	1.25	0.91	0.26	12.7	6.84	13.9
0127	male	1	33	170.7	177.3	54.3	153	153.3	139.5	139.5	1.09892	1.09677	144.5	53.5	7.4	8.85	70.5	22.1	5.9	1.2	0.3	6.23	172	53.4	94.3	30.5	323	47.5	13.7	241	8.5	0.205	15.8	4.23	140.8	99.4	31.7	5.21	4.22	64.3	436	0.98	2.29	1.16	0.8	0.3	16.2	11.1	14.8
0128	male	1	42	99.6	171.9	33.7	110.5	110.5	107.5	107.5	1.02791	1.02791	111.5	43.5	5.73	5.65	66	24.3	5.2	4.1	0.4	3.74	141	36	84	28.6	340	39.5	12.7	199	11.2	0.223	17.2	4.98	130.7	93.8	22.7	13.76	10.73	141	615	1.47	2.1	1.38	0.83	0.25	11.1	8.4	13.5
0129	male	1	47	72.4	165	29.6	97.8	97.8	96	96	1.01875	1.01875	97.5	42	1.07	6.03	60.3	32.5	5.7	1	0.5	3.64	143	42.7	87.7	29.5	336	41.1	12.7	277	9.4	0.261	15.9	4.07	136.5	101.2	25.6	7.84	7.16	107	292	1.09	2.28	1.04	0.84	0.3	17	13.7	17.2
0130	female	2	46	76.6	163.8	28.6	101	101	103	103	0.980583	0.980583	108.3	38	0.49	8.56	68.2	26.4	4.2	0.8	0.4	5.84	150	45.5	95.2	31.3	329	45.1	12.9	237	9.4	0.223	15.7	4.01	137	102	22.2	4.85	4.91	56	325	0.75	2.32	1.01	0.78	0.28	14.1	11.3	18.9
0131	male	1	28	137.4	180.7	42.1	131.5	131.5	128.5	128.5	1.02335	1.02335	131	48.5	18.22	8.96	70.5	24	4.1	1.1	0.3	6.31	165	49.3	87.3	29.3	334	41.5	12.9	390	9.6	0.375	16	4.02	142.6	103.5	23.3	5.11	3.69	57	612	0.91	2.31	1.52	0.8	0.29	18.8	12.6	13.9
0132	female	2	27	97.9	160.3	38.1	121.5	125.5	121	121	1.03719	1.00413	117	41	4.51	6.75	52.8	35.4	4.9	6.4	0.5	3.57	140	41.8	89.1	29.8	334	42.6	12.9	209	11.3	0.237	16.3	3.87	141.8	107.7	20.2	4.79	5.22	73	404	0.98	2.09	1.09	0.76	0.25	17.2	11.9	11.8
0133	female	2	55	80.1	150.1	35.6	153	102	118.5	118.5	0.860759	1.29114	144.5	53.5	4.71	6.08	66.88	24.3	6.6	1.33	0.89	4.06	136.6	41.36	89.01	29.32	329.4	41.45	13.67	204.1	10.44	0.217	16.1	3.84	140.8	103.8	24.9	8.33	4.93	40	298	0.7	2.19	1.01	0.76	0.28	15.9	10.8	18.4
0134	female	2	16	108.9	172.9	36.4	123.5	123.5	126	126	0.980159	0.980159	123	37.5	1.39	6.04	65.2	25.5	6.4	2.4	0.5	3.94	115	35	84.9	28	330	43.8	13.9	320	9.6	0.309	15.4	4.25	137.3	103.2	23.3	4.54	4.4	53	360	0.92	2.21	1.12	0.86	0.28	16.4	11.9	11.7
0135	male	1	44	99	163.2	37.2	122	122	115	115	1.06087	1.06087	113.5	47	6.17	4.7	60.8	31.9	5.4	1.3	0.6	2.86	151	44.9	92.9	31.2	336	42.8	12.6	192	8.9	0.171	16	3.85	135.3	100.6	26	9.29	4.73	72	440	0.77	2	1.07	0.95	0.18	12.6	11.2	16.4
0136	male	1	39	72.7	163.4	27.2	91.5	91.5	98	98	0.933673	0.933673	96	41.5	1.97	7.5	60.3	31.3	5.8	2.1	0.5	4.51	129	39.6	91.3	29.7	325	42.3	12.6	312	8.4	0.262	15.5	3.79	139.3	104.2	25.1	7.06	5.15	62.2	386.5	0.93	2.27	1.3	0.82	0.26	15.5	11.1	14.4
0137	female	2	48	103	158.7	40.9	117.5	117.5	124	124	0.947581	0.947581	117	43	4.37	6.65	49.6	37.3	5.7	6.2	1.2	3.3	123	37.9	93.7	30.3	324	45.4	13.2	240	10.6	0.254	16	3.89	140	104.2	24.8	6.85	5.95	43.9	469.5	1.02	2.36	1.3	0.74	0.28	16.9	14.4	11.8
0138	male	1	25	177.3	173.2	59.1	163	163	146.5	146.5	1.11263	1.11263	146	50	13.84	7.68	62.2	28.3	6.4	2.6	0.5	4.78	135	44.1	84.5	25.9	306	47.1	15.2	282	10.6	0.299	15.9	4.01	139.5	104.4	25.9	5.35	3.31	77.1	463.5	1.24	2.33	1.12	0.86	0.19	9.2	10.4	7.2
0139	female	2	29	115.9	171.1	39.6	117	117	128.5	128.5	0.910506	0.910506	123	42	7.47	7.52	71.2	22.4	4.4	1.7	0.3	5.36	134	42.5	89.4	28.1	314	43.5	13.3	203	10.8	0.218	16.3	3.8	140	104.8	23.1	5.42	2.98	60	373	0.79	2.1	1.05	0.84	0.27	16.6	10.6	17.2
0140	female	2	31	127.5	163.6	47.6	142.5	142.5	142	142	1.00352	1.00352	133.5	39	7.17	8.08	71.9	21.8	4.2	1.7	0.4	5.81	127	41.4	78.9	24.3	308	40.7	14	268	8.9	0.238	15.7	3.92	137.1	104.9	21.2	4.73	4.8	66	363	0.99	2.09	1.09	0.82	0.31	19.1	9	14.4
0141	female	2	31	101.3	164	37.7	131	131	116.5	116.5	1.12446	1.12446	115	40.6	15.25	4.43	53.62	36.96	7.44	1.52	0.465	2.38	132.4	39.59	92.05	30.79	334.5	41.56	13.17	247.6	8.88	0.254	15.8	3.8	138.7	102.2	25.7	6.8	3.24	70	575	0.95	2.21	1.35	0.84	0.29	16.9	10.5	14.6
0142	male	1	28	188.5	183.2	56	166.5	166.5	145	145	1.14828	1.14828	150.8	56.5	11.06	11.27	67	24.1	6.1	2.5	0.3	7.55	164	53.2	90.9	28.1	309	46.6	14	239	10.7	0.257	16.5	4.25	138.7	98.85	28.8	7.16	5.58	59.6	862	1.1	2.33	1.56	0.79	0.3	20.9	9.4	18.1
0143	female	2	41	83.3	154	35.1	100.5	100.5	114	114	0.881579	0.881579	106	41	9.13	9.99	59.6	33.6	4	2.4	0.4	5.95	157	49.2	94.6	30.2	320	44.8	12.9	332	9.5	0.314	15.8	3.68	139.9	103.3	24	6	3.56	39.8	354.6	0.69	2.2	1.26	0.81	0.29	17.2	9.9	18.1
0144	male	1	20	135.6	179.6	42	134.5	134.5	123.5	123.5	1.08907	1.08907	131.5	48	3.36	8.65	58.4	28.2	10.3	2.8	0.3	5.05	153	44.8	90	30.8	342	38.9	11.7	208	9.9	0.205	16.5	3.6	141.8	107.4	21.6	4.93	8.13	95	792	1.25	2.24	1.58	0.71	0.26	12.7	10.1	13.4
0145	female	2	34	81.2	158	32.5	104.5	104.5	107.5	107.5	0.972093	0.972093	111.5	39	6.13	6.47	54	39.2	4.8	1.3	0.7	3.49	136	41.2	91.6	30.3	331	43.6	12.9	148	13.2	0.196	17	3.21	137.5	101.6	24	5.9	4.24	43.3	353.6	0.66	2.23	1.15	0.74	0.32	23.2	12.6	15.9
0146	female	2	24	100	160.8	38.7	110.5	110.5	126	126	0.876984	0.876984	111	38	6.4	8.3	50.5	42	5.7	1.3	0.5	4.19	150	45.4	85.9	28.4	330	39.2	12.4	376	10	0.374	15.8	4.25	138.4	104.8	21.7	5.23	4.72	46.4	264.9	1.03	2.44	1.22	0.81	0.29	18.9	10.2	9.6
0147	female	2	25	88	160.2	34.3	105	105	112.5	125	0.84	0.933333	111	39	3.71	4.79	60.4	31.3	4.8	2.3	1.2	2.89	131	40.3	90.8	29.5	325	44.3	13.2	304	11	0.333	16.2	4.28	138.8	103.8	25.1	4.7	4.2	58.2	529.8	1.02	2.47	1.1	0.82	0.28	17.5	9.8	22.7
0148	female	2	42	91.9	164.8	33.8	115	115	119.5	119.5	0.962343	0.962343	111.5	38.5	0.98	7.05	62.5	27.6	5.7	3.9	0.3	4.41	158	48.5	84	27.3	325	40.3	13	263	10.8	0.285	16.7	3.95	136.5	102.9	23.2	16.12	5.37	52	300	0.47	2.3	1.17	0.82	0.29	19.5	10.7	15
0149	male	1	27	134.6	172.6	45.2	132.5	132.5	132.5	132.5	1	1	135.5	53.5	11.72	13.13	69.4	22.9	5.1	2.1	0.5	9.1	173	54.6	91.4	29	318	42.5	12.6	286	9.7	0.278	15.9	4.22	144.5	101.2	31	5.16	3.87	71.2	812.6	0.94	2.37	1.18	0.96	0.37	21.9	10.7	16.9
0150	male	1	23	124.9	185.5	36.3	117	117	118	118	0.991525	0.991525	122.5	46.5	3.15	8.9	54.7	37.9	5.2	1.6	0.6	4.88	161	47.8	90.5	30.5	337	39.7	11.9	335	9.4	0.317	16.1	3.9	137.7	105	22.3	5.36	4.59	83.5	462.1	0.97	2.36	1.39	0.8	0.3	15	10.9	16.5
0151	male	1	32	94.1	173.2	31.4	106	106	112	112	0.946429	0.946429	108	44	6.72	10.03	53.9	33.8	7.6	4.2	0.5	5.41	171	50.7	91.2	30.7	336	39.6	11.8	202	10.7	0.216	16.5	3.78	142	104.8	23.6	6.1	6.9	96	733	0.98	2.32	1.25	0.82	0.33	15.6	8	14.5
0152	female	2	34	71.4	156.7	29.1	96.5	96.5	104.5	104.5	0.923445	0.923445	105.3	37	0.99	5.94	59.4	34.1	5.6	0.5	0.4	3.53	139	42.4	94.8	31	328	46.7	13.4	250	9.3	0.223	15.5	3.99	137.6	108	21	5.4	4.22	38.7	338	0.67	2.19	1.16	0.77	0.3	14.2	8.9	15.1
0153	male	1	26	173.7	184.9	50.9	155	155	138	138	1.12319	1.12319	155.4	47.5	7.34	10.39	61.3	31.5	5.2	1.7	0.3	6.37	149	46.5	87.9	28.2	321	42.8	13.2	211	10.1	0.214	16.4	3.64	140.6	103.1	22.1	13.33	5.37	44.4	504.6	0.8	2.26	1.28	0.82	0.27	12.9	7.55	11.5
0154	male	1	27	119.5	179.4	37.1	120.5	120.5	120	120	1.00417	1.00417	117	43.5	3.35	8.03	58.9	32.8	5	2.9	0.4	4.74	163	49.9	84.7	27.7	327	37.6	12.1	239	10.7	0.256	16.4	3.6	144.2	106.9	25.2	4.48	3.58	87	676	0.98	2.23	0.9	0.81	0.28	12.8	9.8	17.1
0155	male	1	22	135.8	169.8	47	136.5	136.5	130	130	1.05	1.05	137	47.1	2.84	6.92	60.5	30.3	6	2.6	0.6	4.18	167	53	90.7	28.5	314	45.6	13.8	299	8.1	0.241	15.7	4.05	141.7	104.9	25.5	4.02	5.41	82	660	0.89	2.32	1.24	0.75	0.29	13.3	10.4	21.6
0156	female	2	53	70.9	154.7	29.6	96.5	96.5	100.5	100.5	0.960199	0.960199	102.5	38.5	4.96	5.57	67.7	25.1	4.9	1.3	1	3.77	149	46	94.2	30.4	323	44.3	12.8	214	12	0.256	16.6	4.36	138.9	104	25	6.5	6.22	42.8	440.1	0.63	2.29	1.19	0.88	0.33	17.4	12.4	12.6
0157	female	2	24	131	172.3	44	130.5	130.5	137.5	137.5	0.949091	0.949091	131	43.8	10.48	9.29	49.7	43.7	4.2	2.1	0.3	4.61	149	45.5	93.1	30.5	327	42.3	12.3	439	9.1	0.397	15.6	4.14	136.5	102.2	24.5	5.5	4.76	56.3	453.2	0.8	2.37	1.1	0.79	0.36	18.9	11	23.2
0158	male	1	26	138.4	179.4	43	137	137	139	139	0.985612	0.985612	129	44	2.06	6.83	54	36.3	7.6	1.7	0.4	3.68	167	52.6	92.7	29.5	318	47	13.8	244	10.9	0.265	15.9	3.98	142.5	107.3	25.4	6.14	4.95	78.2	700.3	0.8	2.29	1.05	0.87	0.27	10.2	10.8	14.2
0159	male	1	31	151.9	175.4	49.4	146.5	146.5	143.5	143.5	1.02091	1.02091	142.5	51	13.7	5.93	59.7	34.4	4.3	1.1	0.5	3.54	163	49.3	85.3	28.1	330	42.6	13.5	245	9.2	0.224	16	4.14	136.6	101.9	22.9	15.1	4.17	69	389	0.71	2.15	0.86	0.9	0.33	18.9	9.7	13.7
0160	female	2	21	84.7	162.4	32.1	103	103	115	115	0.895652	0.895652	104	37	9.14	8.12	62.9	28.4	4.6	3.6	0.5	5.11	144	44.2	87.8	28.6	326	41.4	12.8	219	10.1	0.221	15.9	4.26	141.6	109	24.6	4.91	4.68	80	253	1	2.19	1.42	0.94	0.32	17.1	7.4	15.6
0161	female	2	22	108.9	172.9	36.4					#DIV/0!				1.59	7.02	59.6	34.2	4.3	1.8	0.1	4.18	143	43.4	97	31.8	328	41.5	11.6	296	8.9	0.263	15.6	3.9	139.8	108.1	20.8	4.63	7.02	74	486	0.83	2.29	1.34	0.92	0.29	13.7	8.6	22.3
0162	male	1	27	151.9	175.4	49.4	146.5	146	143.5	142.5	1.02456	1.02091	142.5	51	12.7	8.65	63.4	29.8	4.9	1.4	0.5	5.49	152	48.2	90.1	28.5	316	46	13.8	223	9.4	0.208	16	4.1	140.1	103.7	25.3	6.77	4.54	78	543	1.07	2.2	1.12	0.94	0.32	15.7	8	17.8
0163	male	1	20	139	175.4	45.2	130	130	135	135	0.962963	0.962963	135	46	2.27	5.85	57	35.2	5.4	2	0.4	3.33	157	50.1	70.2	21.9	313	35.9	13.9	275	10.4	0.286	16.2	4.15	140.1	104.4	23.6	5.34	4.83	122	809	1.17	2.39	1.32	0.89	0.3	15.3	10.6	18
0164	female	2	20	77.9	163.1	29.3	103.5	103.5	105	105	0.985714	0.985714	107	38.5	3.74	7.3	53.9	39	4.3	2	0.8	3.93	153	49	85.8	26.9	313	42.4	13.4	262	10.3	0.27	16.1	4.08	140.2	103.8	23.5	4.51	3.62	77	529	1.04	2.33	1.49	0.94	0.33	16.4	12	21.4
0165	female	2	33	81.6	159.3	32.2	104	104	113	113	0.920354	0.920354	107.5	38	6.47	6.28	47.6	43.8	5.9	2.2	0.5	2.99	132	40.5	101.7	33.2	327	46	12.3	245	8.2	0.202	15.5	3.57	138.6	105.3	23.6	5.67	4.02	59.7	317.6	0.88	2.26	1.25	0.89	0.31	16.5	9.6	32.5
0166	male	1	17	92.4	169.8	31.8		130		135	0.962963				1.29	5.95	54.5	35.8	6.5	2.7	0.5	3.24	165	50.4	90.4	29.5	327	42.1	12.6	263	9.2	0.242	16.1	3.96	140.6	105.1	21.7	4.7	4.21	99	604	0.89	2.43	1.51	0.81	0.29	14.8	12	16.2
0167	male	1	19	119.3	178.5	37.4	128	128	127	127	1.00787	1.00787	116	42.5	10.02	11.39	63.7	28.5	6.1	1.4	0.3	7.26	165	51.4	88.9	28.6	322	41.8	12.7	209	10.7	0.223	16.2	4.13	140.2	104.2	24.2	4.93	3.83	56.8	566.8	0.82	2.35	1.21	0.8	0.33	17.1	10.7	21.6
0168	female	2	41	145.4	160.1	56.7	135	135	158.5	158.5	0.851735	0.851735	142	43	9.12	6.05	50.4	41	5.6	2.5	0.5	3.05	126	39.1	86.2	27.8	323	47.5	14.9	282	10.2	0.287	15.8	3.96	138.4	104.1	24.8	4.87	4.91	62.2	398.2	0.79	2.31	1.2	0.77	0.35	19.2	10.6	11.3
0169	female	2	17	107.2	171.5	37.67	133	105	146	124	0.846774	0.910959	126	44	9.72	7.15	59.9	32.3	5	2.3	0.5	4.28	136	43.6	82.9	25.9	312	42.1	13.8	300	9.4	0.284	15.7	4.01	137.9	100.2	25.1	4.29	4.48	67	503	0.78	2.29	1.42	0.89	0.29	13.8	10	14.4
0170	女	2	21	84	164.4	31.1	99	99	111.5	111.5	0.887892	0.887892	105	38	2.97	7.94	56.5	32.2	4.4	6.2	0.7	4.48	139	43.9	80.5	25.5	317	39.7	13.3	286	9.9	0.283	16	4.12	141.7	106	22.2	5.56	3.6	70	463	0.83	2.3	1.4	0.84	0.32	16.1	7.6	16.7
0171	男	1	38	119.7	171.6	40.6	128	128	124	124	1.03226	1.03226	125	45.5	1.46	7.05	58.1	34.5	6.5	0.4	0.5	4.09	152	47.7	97.3	31.1	319	48.2	13.4	304	9.6	0.292	16.4	4.43	140.9	101.8	23.1	9.93	4.42	69	384	0.67	2.32	1.24	0.83	0.26	10.9	10.4	17.6
0172	男	1	37	104.4	175.7	33.8	106	106	114.5	114.5	0.925764	0.925764	115.5	43.5	1.31	8.03	54.9	36.1	5.9	2.7	0.4	4.41	162	50.5	91.6	29.3	320	43.8	13	278	10.1	0.28	16.2	3.79	143.2	106.1	23.7	5.05	4.72	78	458	0.83	2.29	1.24	0.97	0.29	12.8	11	18.9
0173	女	2	27	96.5	165.2	35.3	110	110	120	120	0.916667	0.916667	120.5	38	7.08	9.03	57.8	35.5	5.6	0.6	0.5	5.21	133	40	89.4	29.7	332	37.4	11.3	294	9.7	0.286	15.9	3.76	140.4	108.3	21.1	5.03	3.54	51	308	0.67	2.1	1.12	0.77	0.31	13.6	5.5	23
0174	男	1	50	87.5	170	30.3	128	128	124	124	1.03226	1.03226	125	45.1	0.94	4.51	43	49	4.5	2.8	0.7	1.94	176	53	92.4	30.6	331	42.6	12.4	138	11.1	0.153	16.6	4.02	140.5	103.9	25.9	6.23	5.8	86	305	0.92	2.42	1.24	0.9	0.28	17.4	11.6	24.8
0175	男	1	27	89.7	173.7	29.7	108	108	112	112	0.964286	0.964286	111	43	1.14	6.9	60.1	31.4	3.7	4.6	0.2	4.14	156	48.6	88.1	28.3	322	40.6	12.5	201	11.3	0.228	16.4	4.16	142.8	106.2	24.2	4.61	4.55	87	484	0.68	2.3	1.34	0.87	0.25	10.1	8	17.1
0176	女	2	27	111.7	170.5	38.4	104	104	126	126	0.825397	0.825397	116	39	6.26	15.46	89.3	6.6	3.9	0.1	0.1	13.8	138	41.3	86.7	29	334	37.5	11.6	270	10	0.269	15.9	4.07	138.9	104.4	19.6	5.4	4.42	67.3	308.4	0.82	2.4	1.26	0.71	0.34	19.5	6.2	24
0177	男	1	31	246.4	187.8	34.9	129	129	110	110	1.17273	1.17273	121	46	5.64	12.66	80.4	12.3	7.1	0.1	0.1	10.18	161	48.6	86	28.5	331	39.2	12.4	266	8.4	0.222	16.1	3.81	142.2	103.7	26.3	7.76	5.89	98	469	0.84	2.34	1.36	0.99	0.27	12.8	9.3	19.2
0178	女	2	26	108.9	163.1	40.9	117	117	127	127	0.92126	0.92126	123.5	36.5	8.53	9.95	81.8	11.8	6.4	0	0	8.14	127	39.5	97.9	31.4	321	47	12.9	178	10.6	0.19	16.1	3.72	138.1	101.2	23.6	4.42	4.29	60	422	0.63	2.24	0.98	0.84	0.26	12.3	5.9	82.6
0179	男	1	30	100	174	33	114	114	115	115	0.991304	0.991304	115	42		5.88	49.4	41.3	6.3	2.7	0.3	2.9	172	48.2	89.4	31.9	357	40.3	12.5	202	10	0.2	11.1	4.09	140.2	104.2	25.4	5.05	4.25	67	395.9	0.92	2.33	1.2	0.82				31.4
0180	女	2	31	86	158	34.6	96	96	114	114	0.842105	0.842105	105.5	36.5	13.37	10.25	62.2	30.5	5	2.1	0.2	6.37	141	43.4	93.5	30.4	325	41.4	11.9	358	8.3	0.296	15.5	4.01	140.1	103.1	26.4	5.08	3.49	48.5	400	0.66	2.15	1.02	0.87	0.34	19.1	6.2	20.5
0183	男	1	42	102.4	172	34.6	114	114	113	113	1.00885	1.00885	111	45		5.74	46.7	43.4	6.6	2.8	0.5	2.68	155	45.6	94.6	32.2	340	47.1	13.7	207	11.2	0.23	13.7	4.07	142.1	110.3	23.7	4.92	4.12	78	343	0.85	2.08	0.96	0.88	0.24	9.2	8.1	19.7
0186	1	1	15	120.9	167.1	43.3	131.5	131.5	127.5	127.5	1.03137		124.5	44.5		12.57	65.8	26	6.8	0.8	0.6	8.28	159	46	93.5	32.3	346	42.2	12.4	382	8.9	0.34	9	3.49	138.5	102.7	18.9	3.66	3.77	63	721	0.91	2.32	1.31	0.86				10.1
0188	1	1	39	116.3	175.2	37.9	126	126	119.5	119.5	1.05439		121	46.5		6.75	69.31	21.30	7.60	1.27	0.52	4.68	156.30	46.66	93.93	31.46	334.90	41.13	12.70	180.60	9.17			4.07	141.9	106.6	24.1	6.30	5.17	72	462	0.95	2.08	1.21	0.96				20
0189	1	1	23	143	176	45.9	134	134	137.5	137.5	0.974545		137	46		8.62	51.82	37.25	7.24	3.02	0.67	4.47	140.5	42.99	90.97	29.73	326.8	41.56	13.24	209.6	9.37	0.238	16	4.19	139.8	104.1	25.5	6.56	4.65	74	425	1.04	2.3	1.74	0.92	0.28	13.2	4.1	11
0190	1	1	28	84.4	165.7	30.7	109	109	105	105	1.0381		106	40.5		8.26	61.53	26.8	7.26	3.88	0.53	5.08	158.6	49.14	92.75	29.93	322.7	45.06	14.05	214	10.64	0.259	16.3	3.61	139.1	103.7	24.2	4.74	4.43	85	490	1.08	2.24	1.65	1.03	0.27	15.1	7.3	26
0191	f	2	36	78.1	165.2	28.6	94.5	94.5	103	103	0.917476		98	37.3	1.41	11.95	67.7	25.5	4.5	1.8	0.5	8.08	149	46.2	95.9	30.9	322	44.4	12.5	361	10.4	0.376	16	4.04	138	103.5	22.7	5.35	4.63	69	296	0.64	2.26	1.05	0.88	0.29	14.3	3.7	33.1
0192	f	2	29	87.7	164.2	32.5	114	114	112	112	1.01786		113	37	3.04	9.61	55.1	35.1	4.9	4.4	0.5	5.3	134	42.1	89.7	28.5	317	44.2	13.3	291	8.7	0.283	15.3	4	142.8	104.1	22.3	6.05	5.69	44.7	492.1	0.65	2.2	1.35	0.87	0.28	13.5	4.3	23.8
0193	f	2	40	111.6	162.8	42.1	128	128	129	129	0.992248		133	44	4.01	6.48	59	34.5	3.4	2	0.7	3.82	132	41.1	87.5	28.1	321	39.2	12.1	304	8.8	0.267	15.7	4.06	135.4	104.4	25	6.37	4.91	64	378	0.89	2.18	1.4	0.88	0.36	21.1	4.2	13.6
0194	f	2	36	78.7	159.1	31.1	101	101	109	109	0.926606		105.5	35.5	3.99	6.47	61.1	31.3	5.8	1.4	0.4	3.94	146	45.7	93.9	30.1	320	42.4	12.2	281	9	0.252	15.9	3.59	143.2	104.2	28.5	5.67	4.31	60	278	0.67	2.21	1.09	0.89	0.28	13.7	3.9	16
0195	1	1	22	117	182.7	35.1	118	118	121.5	121.5	0.971193		112	43.5	3.48	7.14	63.1	27.1	3.4	5.7	0.7	4.51	148	45.4	81.8	26.6	325	34.5	11.4	287	9.2	0.264	16.1	4.3	143.4	104.9	25.1	5.36	4.46	74	527	0.74	2.4	1.02	0.84	0.32	18.3	8.6	12.8
0196	1	1	27	110.9	172.8	37.1	121	121	113.5	113.5	1.06608		121	47	2.56	5.92	56.8	34.5	5.2	3.1	0.4	3.37	152	47.7	92.8	29.5	318	42	12.3	220	10.1	0.223	16.4	4.21	143.1	105.3	22.1	5.35	4.8	70	467	0.84	2.22	1.24	0.91	0.26	12.7	7.4	22.5
0197	1	1	39	118.7	177.4	37.7	118	118	118	118	1		120	49.3	1.35	6.2	49.5	41.9	4.4	3.9	0.3	3.07	154	45.7	90.8	30.6	337	40.8	12.2	181	8.4	0.152	16	3.69	141.6	106.6	22.6	8.55	4.11	65	478	0.69	2.19	1.24	0.82	0.26	11.9	6.7	18.3
0202	1	1	16	162.4	180	50.1	142	142	138	138	1.02899		140	51	7.88	7.58	55.6	36.2	6.3	1.9	0	4.22	153	47.7	87.8	28.1	320	39.9	12.3	228	11.3	0.257	16.3	4.31	140.2	102.2	24	6.85	5.03	73.4	657.5	1.2	2.4	1.33	0.9	0.35	17	5.9	164
0203	1	1	43	162.2	180.5	49.8	155	155	148	148	1.0473		139	52	9.37	6.24	66.9	24.8	5.6	2.2	0.5	4.17	156	48.1	87.0	28.2	324	41.8	13.0	266	10.0	0.266	16.3	4.01	139.4	105.8	21.1	8.90	3.09	58	288	0.96	2.12	0.97	0.8	0.310	13.4	4.4	15.1
0204	1	1	25	112.6	165	41.4	125	125	121.5	121.5	1.02881		119.5	44		9.84	63.77	25.21	8.90	1.65	0.47	6.27	148.80	45.24	93.19	30.64	328.80	42.44	13.28	236.60	11.80	0.337	15.9	3.72	143.3	108.3	20.2	6.39	2.89	62	514	0.86	2.08	1.01	0.94	0.270	12.5	7.5	29
0205	f										#DIV/0!					5.69	59.14	32.95	6.36	1.01	0.54	3.36	128.70	39.06	89.98	29.65	329.50	41.13	13.23	250.00	8.40	0.207	15.7	3.86	142.0	105.9	22.9	5.15	3.54	46.5	336.6	0.78	2.31	1.33	0.86				20.9
0206	1	1	34	182	181	55.6	162	162	161.3	161.3	1.00434		142.5	51.5		10.56	78.60	12.31	6.32	2.57	0.20	8.30	153.30	48.24	90.07	28.63	317.80	51.63	16.49	259.10	9.05	0.248	16.4	3.61	141.2	106.0	26.8	5.22	4.26	77	558	1.27	2.07	1.55	0.84	0.340	20	10.7	12.9
0208	f	2	57	80	154	33.7	108	108	112	112	0.964286		112	37	8.55	7.93	65.3	28.6	4.8	0.8	0.5	5.18	149	47.7	97.2	30.3	312	43.2	12.1	254	9.6	0.244	16.0	3.83	139.4	102.4	25.3	7.02	5.52	54.9	534.5	0.99	2.28	1.07	0.83	0.34	20.1	8	20.7
0209	f	2	30	79	158.9	31.3	117	117	109	109	1.07339		111	38		10.24	59.01	31.60	6.87	1.96	0.56	6.04	136.90	41.37	95.89	31.73	330.90	42.00	12.83	244.00	9.80			3.93	142.3	105.6	20.5	5.10	3.98	64	544	0.7	2.26	1.2	0.85	0.340	17.2	6	12.4
0210	f	2	33	118.2	166.5	42.6	115	115	140.5	140.5	0.818505		113.5	37		7.28	67.59	25.77	5.10	1.31	0.23	4.92	137.60	42.94	84.24	27.00	320.50	38.06	13.21	266.80	8.41	0.231	16.2	3.84	142.7	108.5	22.1	7.00	5.11	51	503	0.57	2.08	1.07	0.88	0.330	17.5	7.6	21.2
0211	f	2	32	99.4	155.4	41.2	119	119	121.5	121.5	0.979424		126.5	43		8.97	56.30	36.69	5.47	1.07	0.47	5.05	126.90	38.38	86.51	28.61	330.70	42.88	14.34	161.50	10.58	0.21	16.1	3.72	139.6	107.7	19.8	7.57	5.44	73	468	1.03	2.16	1.11	0.86	0.300	15.3	3.3	10.6
0212	1	1	46	69.3	162.3	26.3	95	95	102	102	0.931373		93.5	28.5		7.61	55.25	36.14	7.03	1.04	0.54	4.20	157.00	46.71	92.31	31.03	336.10	39.81	12.52	153.50	10.09			3.73	140.9	101.5	23.7	12.98	7.31	67	304	0.93	2.12	1.26	0.83	0.250	10.3	7.5	17.3
0213	f	2	21	102.5	168	36.3	103.5	103.5	125	125	0.828		108	40		7.14	68.16	21.65	7.09	2.60	0.50	4.87	125.80	38.47	84.77	27.72	327.00	42.88	14.77	212.20	8.68			4.39	143.2	107.4	22.8	5.37	3.28	68	575	0.83	2.26	1.41	0.78	0.300	13.2	7	8.4
0214	f	2	26	89.9	166.2	32.5	111.5	111.5	114	114	0.97807		119.5	42		7.06	48.82	42.44	5.01	3.09	0.64	3.44	148.20	44.07	90.94	30.58	336.30	40.69	12.99	298.90	8.50	0.243	16.4	4.27	142.7	104.8	22.5	5.05	2.58	82	499	0.93	2.37	1.11	0.9	0.410	23.3	9.3	16.4
0215	f	2	22	84	161	32.4	115	115	110	110	1.04545		113.5	38	27.54	6.92	54.84	33.09	9.07	1.99	1.01	3.79	127.40	38.71	86.17	28.35	329.00	38.06	12.73	289.40	8.88	0.269	16.1	3.97	139.9	103.2	23.3	5.05	4.08	78	492	0.99	2.32	1.57	0.94	0.310	13.9	12.1	14.9
0216	f	2	34	85.6	162.8	32.3	105	105	113.2	113.2	0.927562		107	35		5.26	47.65	42.35	5.71	3.85	0.44	2.51	130.50	41.37	95.68	30.19	315.50	45.50	13.87	174.70	11.29			3.87	140.1	110.8	21	6.41	5.17	82	533	1.02	2.23	1.23	0.79	0.27	9	8.3	13
0217	f	2	31	89.2	166.6	32.1	96.5	96.5	111.5	111.5	0.865471		106.5	42.5		6.90	61.32	27.51	6.73	3.72	0.72	4.23	141.00	42.62	85.94	28.43	330.80	41.56	13.93	239.70	7.43			3.63	142.1	105.0	23.2	6.19	4.18	69	402	0.93	2.17	1.16	0.88	0.310	18.6	12.6	16.7
0218	1	1	31	174.9	183.7	51.8	148.5	148.5	154	154	0.964286		154.4	54		9.54	57.13	33.41	7.84	1.30	0.32	5.45	154.00	47.55	96.42	31.24	324.00	44.19	13.18	188.20	8.49			3.68	140.5	108.5	23	8.19	4.84	66	270	1.03	2.14	1.53	0.84	0.310	14.2	8.5	19.8
0219	1	1	32	135.8	187.8	38.5	143	143	126	126	1.13492		133	46		11.89	58.80	30.20	6.20	4.50	0.30	6.98	160.00	50.10	86.80	27.70	319.00	42.50	13.20	310.00	9.20	0.28	15.90	4.12	142.9	109.6	21.5	5.62	5.36	86	516	1.07	2.2	1.4	0.9	0.28	10.6	5.5	15.9
0220	f	2	60	73.7	156.7	30	114.5	114.5	103	103	1.11165		103.5	39		7.96	71.44	20.27	5.17	2.50	0.62	5.68	138.00	41.56	88.04	29.23	332.00	40.69	13.49	140.50	10.45	0.215	16.7	3.92	138.5	107.4	20.9	16.55	5.26	42	314	0.73	2.06	1.04	0.72	0.280	13.4	9	12.6
0221	f	2	30	88.5	165.1	32.5	116.5	116.5	117	117	0.995726		114.5	40.5		6.28	61.27	33.27	4.52	0.43	0.51	3.84	129.20	39.50	88.26	28.86	327.00	43.75	14.55	241.50	8.93	0.253	16.5	4.06	139.5	104.4	25.1	4.88	3.07	44.8	378.3	0.72	2.3	1.17	0.87	0.320	15.8	9.4	16.5
0222	1	1	27	142.5	168.6	80	145.5	145.5	139.5	139.5	1.04301		140.5	48		9.29	48.37	38.73	6.89	5.27	0.74	4.49	150.80	45.27	91.22	30.39	333.20	43.75	14.08	294.90	8.03	0.158	16.8	3.64	142.2	106.8	20.4	4.96	4.31	72	473	1.22	2.29	1.72	0.96	0.290	14.7	9.1	21.6
0224	f	2	25	91.4	154.1	38.5	124	124	119	119	1.04202		103.5	35.5	8.76	6.00	57.2	29.9	10.4	1.8	0.7	3.44	130	40.6	88.7	28.5	321	42.9	13.0	182	9.8	0.178	15.7	3.84	138.2	108.6	20.9	4.69	3.79	62	397	0.83	2.12	1.4	0.82	0.320	14.5	7.4	11.7
0226		1	25	173.3	133.2	44.1					#DIV/0!					6.83	50.57	37.78	9.85	1.40	0.40	3.45	143.60	43.82	84.10	27.56	327.70	40.25	13.74	217.90	9.77			4.37	139.3	106.6	24.1	5.12	5	98			2.29	1.42	1.17	0.300	13.1	7.8	16
0227		2	24	144.8	97.4	46.5		126.3		130.5	0.967816					10.59	68.14	24.62	5.81	0.86	0.57	7.22	164.8	50.57	87.20	28.42	325.90	41.56	13.85	310.40	8.77			4.37	137.8	105.1	24	14.12	3.96	53	294	0.77	2.32	1.52	0.83	0.400	26.4	8.6	14.1
0228		1	30	171.4	144.8	50.7		145.5		147	0.989796					11.04	75.75	16.20	6.37	1.33	0.35	8.36	155.70	47.83	88.57	28.82	325.40	46.38	15.25	257.00	7.81			3.38	139.0	102.8	28.8	5.81	4.75	94.7	557.3	1.27	2.04	0.94	0.92	0.310	15.8	5.1	13.2
0229		2	41	162.5	102.8	38.9		124		132.5	0.935849				4.35	6.60	64.7	25.1	4.7	5.1	0.4	4.26	127	38.0	90.1	30.1	334	41.7	12.5	222	9.9	0.220	15.9	3.97	139.5	99.2	23.7	5.65	7.98	53	332	0.91	2.07	1.04	0.84	0.300	14.9	4.1	10.4
0230		1	71	168.4	93.2	32.9		116.5		113.5	1.02643				3.11	2.44	59.8	27.9	9.1	1.9	1.3	1.46	130	39.8	91.6	30.0	328	46.9	13.8	87	11.0	0.095	16.8	3.86	142.8	100.8	21.6	14.84	10.33	134	590	2.21	2.26	1.16	0.93	0.290	13.2	3.8	9.6
0231		2	20	167	82	29.4		90.5		110	0.822727					6.27	51.89	36.16	6.75	4.46	0.74	3.25	134.80	39.91	95.52	32.27	337.90	42.00	12.83	228.60	9.40			3.87	139.0	108.5	21.8	5.38	4.92	67	355	0.77	2.24	1.37	0.9	0.290	12.5	10.1	7
0232		1	35	181.2	158.4	48.2		149.5		142	1.05282					8.65	57.56	30.51	7.99	2.93	1.01	4.98	141.70	42.78	89.59	29.67	331.20	41.56	13.44	411.00	7.91			4.29	137.3	103.5	22.1	5.65	5.48	72.9	736.4	1.28	2.37	1.17	0.93	0.350	25.3	11.1	14.2
0233		2	21	157.8	113.8	45.7		126		132	0.954545					9.57	58.59	30.20	5.91	4.81	0.49	5.61	142.70	43.17	85.28	28.19	330.60	42.00	14.21	315.10	8.94			4.07	140.8	103.0	22.5	5.48	4.14	53.1	433.2	0.86	2.28	1.3	1.1	0.300	18.6	10.7	16.3
0234		1	31	173.5	111.2	36.9		121.5		117	1.03846				2.22	6.88	40.0	48.3	7.0	4.2	0.5	2.76	165	49.1	86.7	29.2	336	40.8	12.7	186	10.4	0.194	16.2	4.17	138.7	103.9	25.5	7.57	3.12	88	446	1.06	2.16	1.12	0.89	0.260	14.5	9	15.2
0235		1	39	184.6	190	55.8		168		159	1.0566					8.95	74.11	16.97	6.79	1.66	0.47	6.63	185.00	55.99	87.14	28.79	330.40	45.06	14.85	172.20	10.20			4.47	141.6	101.9	27.1	5.36	4.21	79	541	1.21	2.17	1.24	0.94	0.330	22.1	14	24.8
0237		2	37	156.8	78.5	31.9		108		110.5	0.977376					8.12	67.72	25.78	5.08	1.08	0.34	5.50	141.70	41.77	88.72	30.09	339.10	37.63	12.45	248.90	8.95			3.77	136.4	98.0	25.4	12.91	5.16	53.9	291.7	0.91	2.16	0.91	0.74	0.260	15.9	8.9	17
0238		2	30	157.5	87.9	35.4		112		118	0.949153					7.91	49.41	39.58	9.32	1.42	0.27	3.91	121.00	38.73	69.95	21.86	312.50	36.75	15.35	302.10	7.25			3.82	139.8	107.5	22.1	5.45	3.78	69	352	0.79	2.03	1.04	0.78	0.290	14.8	8.7	11.6
0239		2	36	157.8	88.7	35.6		116.5		118.5	0.983122					7.20	56.69	32.26	6.86	3.61	0.58	4.08	130.20	39.32	87.41	28.93	331.00	40.25	13.20	416.00	7.62			4.33	140.7	105.2	23.1	4.88	4.11	54	247	0.79	2.19	1.25	0.95	0.290	24.7	8	10.5
0241		2	37	165	114	41.9		118.5		136	0.871324				3.89	8.88	66.1	25.9	4.3	3.2	0.5	5.88	135	39.0	89.4	31.0	346	40.5	12.2	260	9.7	0.252	15.9	3.40	137.6	101.3	27.1	6.62	5.13	88.4	539.9	1.2	2.18	1.32	1.2	0.290	18.2	8.4	21.9
0243		2	22	168.8	119.7	42		130		116.5	1.11588					9.57	58.93	30.80	7.35	2.49	0.43	5.64	139.90	42.27	87.65	29.01	330.90	41.13	13.59	309.30	8.12			3.97	141.5	104.7	22	6.49	3.63	65	782	1.08	2.4	1.21	0.8	0.310	16.4	9.8	17.5
0244		2	47	151.9	67.8	29.4		95.5		103	0.927184					5.96	46.31	42.53	9.01	1.61	0.54	2.76	133.00	39.69	88.49	29.64	335.00	40.69	13.32	250.10	8.26			3.94	141.6	104.6	27.1	6.07	4.04	55	260	0.78	2.19	1.44	0.91	0.320	17.9	7.9	16.3
0245		2	37	151.3	69.4	30.3		95		106.5	0.892019					9.32	56.57	24.86	13.48	4.30	0.79	5.27	139.30	40.96	90.51	30.77	340.00	39.38	12.51	239.10	9.83			3.55	142.4	105.7	21.1	5.29	5.47	49.8	429	0.87	2.04	1.39	0.82	0.300	15.7	6.5	14.7
0247		1	31	171.3	106.9	36.4		118.5		114.5	1.03493					11.00	53.59	33.29	8.50	4.03	0.59	5.89	154.60	45.64	86.08	29.16	338.80	38.94	13.05	289.30	8.33			4.04	141.0	105.0	22.3	6.47	3.82	64	436	1	2.16	1.59	0.9	0.290	15.9	7.7	11.9
0248		1	31	147	107.9	49.9		129		133.5	0.966292					8.65	63.83	26.35	9.74	0.00	0.08	5.52	170.80	50.81	90.94	30.57	336.10	44.63	14.30	216.20	8.87			3.93	142.7	106.4	22.9	5.77	4.48	74	560	0.95	2.14	1.08	0.96	0.170	4.8	8.5	15.5
0249		1	19	177.6	115.8	36.7		119.5		126.5	0.944664					7.07	54.00	36.36	6.63	2.47	0.54	3.82	138.00	40.89	87.47	29.53	337.60	39.81	13.25	226.50	8.74			3.96	140.6	109.3	23.7	5.33	5.27	69	486	0.86	2.21	1.52	0.93				17.2
0250		2	18	165	92.7	34		111		132.5	0.837736					7.09	51.9	41.0	5.5	1.3	0.3	3.68	144	43.6	91.1	30.1	330	40.8	12.1	382	8.1			4.17	139.3	106.1	19.2	6.05	4.09	64	448	1.12	2.1	1.22	0.94	0.280	16.7	9.5	18.2
0251		1	56	172.9	136.8	45.8		142		127	1.11811					3.42	61.23	28.32	7.73	2.05	0.67	2.10	148.10	43.92	97.81	32.98	337.10	46.81	13.75	135.20	8.50			3.63	142.3	104.4	25.9	5.62	5.31	52.8	311.3	0.97	2.25	0.95	0.74	0.250	10.8	9.8	21.2
0252		2	37	160.8	89.3	34.9		114.5		119	0.962185				1.09	4.73	66.0	25.6	6.4	1.3	0.7	3.13	134	41.5	87.4	28.1	322	44.2	13.7	305	10.3	0.315	16.1	3.97	139.5	107.4	23.1	5.20	2.41	58	427.6	0.83	2.28	0.91	0.85	0.290	14.9	7.8	6.3
0253		2	28	152.5	109.6	47.1		127		133	0.954887					6.28	49.60	41.68	6.62	1.65	0.45	3.12	129.50	39.85	86.10	27.99	325.10	44.19	14.77	301.40	9.17			4.07	141.6	101.0	26.4	10.25	4.18	45.7	587.1	0.83	2.3	1.06	0.74	0.320	18.6	7.9	11.5
0254		2	21	176.3	133.5	43		127.5		135	0.944444					8.71	61.82	31.21	4.90	1.68	0.39	5.38	131.70	40.01	88.89	29.27	329.20	42.88	13.97	255.10	8.77			3.87	143.4	104.2	24.5	4.69	5.45	58.3	496.6	1.15	2.22	1.21	0.85	0.300	15.8	7.5	13.6
0255		2	34	161.2	116.6	44.9		131		143	0.916084					7.09	55.05	36.22	7.34	1.15	0.24	3.90	134.00	40.56	86.94	28.71	330.20	41.56	13.68	236.70	8.90			3.82	143.7	107.0	24.1	6.84	4.03	57	394	0.87	2.09	0.97	0.99	0.320	18.3	9.8	13.5
0256		1	17	171.7	126.9	43		123		128.2	0.959438					9.32	65.64	25.54	6.61	1.68	0.53	6.12	151.5	44.49	89.58	30.50	340.50	42.00	13.49	247.10	9.27			4.30	139.8	100.3	21.1	4.08	4.27	59	653	0.98	2.33	1.31	0.85	0.290	13.6	8.2	16.3
0257		2	35	162.6	113.4	42.9		129		139	0.928058					9.04	63.72	28.55	5.51	1.84	0.38	5.76	141.4	41.80	88.30	29.86	338.1	41.13	13.46	204.9	8.79	0.214	16.1	3.58	140.3	103.0	23	4.72	4.16	47	419	0.72	2.06	1.04	0.79	0.290	16.1	8.5	25
0258		1	26	179.3	129.5	40.3		126.5		123.5	1.02429					6.24	51.22	38.82	8.02	1.54	0.40	3.20	147.10	42.10	91.61	32.01	349.40	39.81	12.67	260.10	8.03			3.98	142.6	107.4	19.3	6.53	3.87	70	569	0.84	2.25	1.18	0.89	0.260	11.6	6.8	21.1
0259		2	30	165.2	94.7	34.7		118.5		122	0.971311				6.32	8.16	47.50	45.80	4.10	2.20	0.40	3.88	138.00	41.10	87.30	29.40	337.00	38.90	12.00	259.00	9.60	0.25	15.70	4.02	141.9	108.4	21.5	4.53	5.55	64	423	1.08	2.11	1.17	0.9	0.290	17.6	9	20.5
0260		1	38	170.5	149.2	51.3		147.5		137	1.07664					8.80	60.04	29.63	7.78	2.06	0.49	5.28	150.20	45.11	99.66	33.18	332.90	47.69	13.82	222.80	9.64			3.59	139.9	99.4	29.1	5.98	2.72	65	555	1.08	2.07	1.34	0.83	0.320	19	8.7	15.2
0262		2	15	165.8	105.1	38.2		107.5		132	0.814394					7.89	51.38	39.78	6.81	1.46	0.57	4.05	131.2	39.44	86.38	28.74	332.7	43.31	14.58	315.8	7.19			4.44	140.5	105.1	26.1	4.73	4.77	58.5	500.5	1.14	2.33	1.33	0.87	0.320	20.4	8.6	11
0263		2	22	168.5	100.4	35.3		115		125.4	0.917065				1.40	5.17	46.0	45.9	3.4	3.6	1.1	2.37	143	43.0	93.1	30.9	332	43.1	12.5	253	9.4	0.238	15.8	3.60	140.9	107.4	23.3	4.33	3.18	61	320	0.79	2.11	1.06	0.75	0.270	12.9	7.7	30
0264		2	34	164.6	93.4	34.5		99		120.5	0.821577					6.14	53.24	39.25	5.51	1.14	0.86	3.27	138.90	40.71	90.36	30.82	341.10	41.56	13.28	211.40	9.17			3.88	141.8	102.6	22.8	4.91	4.99	57.7	350.2	0.8	2.18	1.18	0.8	0.240	11.2	5.4	25.3
0265		2	25	157.8	103.5	41.6		119.5		130	0.919231					11.57	68.26	23.81	5.38	2.21	0.34	7.90	121.30	39.20	73.96	22.88	309.40	41.56	16.26	276.20	8.51			3.50	140.7	103.5	21.1	4.16	3.34	61	609	1.25	2.11	1.43	0.96	0.320	19.6	8.3	17.1
0266		2	26	167.4	128	45.7		126		145	0.868966					5.31	48.87	38.54	9.85	2.41	0.33	2.59	116.30	35.93	83.32	26.97	323.70	45.06	15.68	330.50	8.24			4.16	140.4	104.0	22.9	5.23	4.5	43.8	418.2	0.88	2.14	1.5	0.87	0.300	16.9	7.4	9.7
0268		1	21	170.7	124.4	42.7		135		127.5	1.05882					10.21	59.49	29.43	8.59	1.79	0.70	6.07	158.30	47.98	90.63	29.91	330.10	41.56	13.31	421.10	8.35			4.90	141.6	105.8	25.9	4.77	4.14	77	609.8	1.07	2.47	1.48	0.96	0.340	22.8	11.8	21.3
0269		2	34	165.1	93.5	34.3		116		107	1.08411					6.73	53.80	39.25	5.01	1.53	0.41	3.62	149.20	44.00	91.68	31.08	339.00	41.56	13.22	164.20	10.26			4.33	137.4	101.9	23.4	15.06	4.04	56	380	0.64	2.29	1.21	0.74	0.270	15.7	6.6	19.7
0270		2	36	151.1	76.3	33.4		105		110	0.954545					9.07	68.40	24.40	5.74	1.20	0.26	6.20	133.10	39.48	89.87	30.29	337.10	39.81	12.91	228.70	7.55			3.05	140.7	112.5	24.8	6.42	2.13	52	286	0.74	2.02	1.23	0.89	0.290	17.6	8.5	11.8
0271		2	35	170.6	92.3	31.7		105.5		111.5	0.946188					6.95	63.83	26.19	6.94	2.65	0.39	4.43	116.80	35.24	86.84	28.79	331.60	42.00	13.97	263.20	8.96			3.45	141.1	109.5	22.1	5.10	3.47	60	295	0.7	2.01	1.11	0.88	0.260	14.8	4.6	10
0272		2	55	150.4	81.4	33.2		100.7		112	0.899107					6.48	59.73	30.58	8.30	0.91	0.48	3.87	145.1	44.00	90.54	29.86	329.8	42.44	13.7	250	7.86			3.80	141.4	106.0	23.1	5.85	3.71	58	536	1	2.1	1.11	0.82	0.260	17.4	9.8	17.7
0273		2	26	159	84	33.2		100.7		112	0.899107					6.84	55.05	35.11	7.26	2.28	0.30	3.77	141.90	43.26	86.12	28.24	327.90	38.94	12.98	290.80	8.83			4.16	144.0	106.0	24.2	5.16	3.75	51	449	0.8	2.22	1.61	0.75	0.280	14.5	8.2	8.3
0274		2	22	152.8	92.1	39.4		110.3		118.8	0.928451					7.80	43.24	48.02	7.31	1.20	0.23	3.38	132.40	39.84	91.81	30.52	332.50	40.25	12.79	268.20	9.23			3.78	142.1	106.1	21.8	4.47	4.61	71	382	1.11	2.09	1.37	0.91	0.290	16.6	8.1	16.8
0275		1	15	185.7	135.9	34.3		124.5		127.5	0.976471				22.44	11.49	93.4	3.7	2.4	0.4	0.1	10.72	150	45.3	87.1	28.9	332	40.3	12.5	192	10.7	0.204	16.3	4.09	140.0	104.2	23.9	4.95	4.68	78	622	1	2.23	1.52	0.99	0.300	24.7	5.2	7.4
0276		2	29	149.7	83.1	37.1		111		116.5	0.95279					11.64	56.64	33.80	6.27	2.76	0.53	6.60	149.90	45.33	88.25	29.18	330.70	42.00	13.81	281.80	8.21			3.80	137.4	96.6	23.5	4.77	4.47	46	606.5	0.88	2.56	1.25	0.74	0.310	25.7	8.3	22.5
0277		2	30	161.4	84.4	32.4		99		110.5	0.895928					12.08	64.89	26.46	7.18	1.20	0.27	7.84	117.70	35.87	86.32	28.34	328.30	42.44	14.24	351.30	8.15			3.97	134.7	100.8	21.8	5.36	2.23	39.7	341.3	0.71	2.36	1.08	0.84	0.330	30.9	5.9	7.9
0278		2	23	170.6	161.6	55.5		157.5		160.5	0.981308					6.72	47.36	35.95	7.56	8.38	0.75	3.18	130.70	39.11	93.66	31.29	334.00	42.88	13.33	193.10	9.06			3.89	141.8	109.8	23.6	4.54	4.04	43	320	0.83	1.95	1.39	0.89	0.260	13.5	8.8	12
0279		2	34	154.1	96	40.4		112.5		128	0.878906					7.56	49.67	38.71	7.25	4.03	0.34	3.76	120.80	37.68	83.23	26.68	320.60	38.50	13.25	268.60	7.49			3.63	139.9	104.2	23.5	4.96	4.97	52	396	0.73	1.9	1.23	0.93	0.260	18.1	7.1	8.8
0280		2	33	159	92.9	36.7		125.5		130	0.965385					7.23	56.93	35.60	5.40	1.41	0.66	4.12	116.70	35.68	77.32	25.28	327.00	40.69	15.19	280.30	7.28			3.64	141.7	115.5	21.5	5.97	2.94	52	311	0.74	2.02	1.27	0.87	0.310	22.1	10.5	8.7
0281		2	30	149.8	87.2	38.9		99		120	0.825					6.04	56.89	29.31	9.43	3.71	0.66	3.44	126.60	37.41	89.17	30.18	338.50	40.25	13.14	280.20	7.72			3.60	141.1	112.6	23.8	6.63	4.07	65	389	0.92	2.1	1.4	0.93	0.320	21.1	6.4	10.3
0282		2	25	165.2	94.7	34.7		118		119.5	0.987448					9.21	68.35	22.57	7.55	0.73	0.80	6.30	137.90	41.59	94.82	31.44	331.60	42.00	12.88	332.00	10.56			4.35	140.7	106.8	20.2	4.87	2.83	66	412	0.86	2.3	1.15	0.86	0.290	18	8.2	20.8
0283		2	40	159	81.9	32.4		101		108.5	0.930876					6.19	61.97	29.16	6.36	1.77	0.74	3.84	140.60	42.27	91.17	30.33	332.70	40.25	12.87	264.90	8.37			4.21	140.3	104.4	23.3	5.21	5.6	44.6	336.7	0.84	2.32	1.21	0.88	0.310	20.5	9.1	20.7
0284		2	20	165.7	91.6	33.4		113.5		126	0.900794					5.27	41.87	50.24	5.75	1.87	0.27	2.21	115.30	35.65	79.61	25.75	323.40	40.25	14.60	253.30	7.27			3.48	143.8	108.9	24	4.80	2.57	69	422	0.86	2.19	1.28	0.83	0.300	18.5	8.3	7.5
0285		2	31	167	86.6	31					#DIV/0!					7.00	45.80	45.90	6.30	1.70	0.30	3.21	100.00	32.30	79.60	24.60	310.00	51.90	18.50	407.00	10.10	0.41	11.20	4.33	141.5	105.4	22.6	4.77	4.15	56.2			2.27	1.07	1.05	0.330	22.8	8.3	8.1
0286		2	38	158	90.2	36.2		104.5		120	0.870833					7.88	60.65	32.03	5.70	1.25	0.37	4.78	126.30	37.78	89.18	29.80	334.20	43.75	14.20	250.00	7.85			3.93	141.6	108.5	20.5	5.28	5.22	68	431	0.78	2.1	1.04	0.8	0.320	20	6.9	12.1
0287		2	24	160.3	113.8	44.3		120		134.5	0.892193					9.14	58.35	32.24	6.31	2.50	0.60	5.33	144.10	43.63	91.70	30.29	330.30	41.56	13.07	267.30	9.95			4.22	143.8	107.3	24.7	5.51	3.95	62	462	0.87	2.27	1.43	0.93	0.260	15	8.6	16.6
0288		1	19	180.8	144	44.1		139		133.3	1.04276					10.94	60.94	28.14	6.51	3.59	0.82	6.66	166.80	50.00	89.24	29.76	333.50	41.56	13.59	143.30	11.07			4.12	140.3	107.4	23.6	5.57	2.89	69	337	0.9	2.19	1.68	0.85	0.280	15.7	8.5	15.5
0289		2	17	163.1	109.6	41.2		106		129	0.821705					6.80	45.08	40.15	7.48	6.37	0.92	3.07	138.80	40.81	89.76	30.54	340.20	38.50	12.52	225.00	9.78			4.09	142.2	112.2	23.1	4.81	4.08	71	477	0.96	2.44	1.57	0.88	0.300	16.7	7.8	21.6
0290		2	34	162.4	126.9	48.1		137.2		148	0.927027					7.93	56.73	34.98	6.36	1.28	0.65	4.50	129.10	38.89	86.40	28.69	332.00	46.38	15.49	310.10	8.98			3.97	141.2	105.5	21.2	5.46	3.8	54.4	564.9	0.92	2.38	1.22	0.81	0.320	18.3	7.1	10
0291		2	33	158.4	80.2	32.2					#DIV/0!					8.18	57.47	36.41	4.49	1.14	0.49	4.70	126.80	38.66	94.65	31.04	327.90	42.44	12.98	306.80	8.64			3.47	139.2	106.0	23.9	4.70	3.62	63			2.12	1.19	0.9	0.260	13.9	7.6	20.5
0292		2	32	167.1	137.7	49.3		150		143.5	1.0453					14.48	72.55	19.88	5.71	1.45	0.41	10.51	141.60	43.58	85.62	27.82	324.90	41.13	13.97	245.60	9.30			3.89	134.8	99.8	20.8	9.44	5.55	69	467	1.16	2.19	1.15	0.86	0.300	16	8.3	16.1
0293		1	43	172.4	127.8	43		135		126	1.07143					8.88	51.56	37.10	7.05	3.88	0.41	4.58	163.40	48.22	99.27	33.65	338.90	46.38	13.44	210.40	8.44			3.72	143.4	115.0	25.5	6.50	4.23	74	559	0.92	2.27	1.32	0.97	0.310	18.6	8	19
0295		1	14	178.6	139.7	43.8		129.6		129.5	1.00077					4.68	47.25	39.38	9.94	3.15	0.28	2.21	150.50	44.82	90.13	30.27	335.80	38.94	12.62	294.20	8.03			4.03	139.5	101.9	25.5	4.97	4.58	47.8	574.1	1.03	2.29	1.43	0.85	0.290	14.8	10.8	27.3
0296		2	32	173	103.8	34.7		109		122	0.893443					9.68	60.80	30.95	5.44	2.14	0.67	5.89	140.50	41.95	93.36	31.27	334.90	43.31	13.52	381.80	7.84	0	0	4.27	138.8	101.2	23.9	5.37	3.91	55.4	509.6	1.01	2.35	1.3	0.78	0.300	16.6	7.1	23.1
0297		2	29	161.5	72.9	28		100		105.5	0.947867					6.76	51.10	39.59	7.59	1.30	0.42	3.46	132.60	38.90	90.68	30.92	340.90	39.38	12.60	201.60	8.64			3.79	141.2	105.7	22.1	5.45	4.18	67	388	0.9	2.12	1.29	0.77	0.270	11.5	5.3	14.9
0298		1	38	163	95.4	35.9		123		116.5	1.05579					8.51	62.89	26.68	6.77	3.11	0.55	5.35	157.40	47.42	96.02	31.87	331.90	42.00	12.68	199.10	10.34			3.89	138.5	100.3	25.7	15.70	3.08	62	316	0.83	2.2	1.27	0.81	0.320	16.2	6.6	14.3
0299		2	33	159	102.4	40.5		119		128	0.929688					12.69	69.12	26.64	3.39	0.67	0.18	8.77	126.60	38.64	82.68	27.09	327.70	40.25	14.01	375.80	8.09			3.81	139.5	104.3	23.5	7.62	3.71	63	329	0.97	2.09	0.75	0.81	0.350	24.3	4.9	6.3
0300		2	31	158.3	115.1	45.9		141		134.5	1.04833					12.78	61.61	26.88	8.67	1.91	0.93	7.87	148.00	43.91	82.55	27.81	336.90	38.06	13.35	268.70	8.77			4.04	136.7	99.4	22.7	14.26	3.83	51	470	0.81	2.05	1.33	0.88	0.350	22	5.2	9.7
0301		1	29	169	102.2	35.8		113		116	0.974138					5.81	41.73	43.83	11.21	2.34	0.89	2.42	137.1	40.58	92.32	31.19	337.9	42.44	13.52	303	7.91			4.10	141.2	105.9	22.8	5.61	5.1	68	438	0.89	2.06	1.51	0.89	0.260	12.5	6.3	18
0302		1	22	175	133.5	43.6		130		130	1				19.16	12.65	67.0	25.7	5.1	1.9	0.3	8.47	162	48.4	89.8	30.0	334	41.0	12.3	289	10.4	0.302	16.4	3.77	140.6	103.3	23.7	5.97	3.8	83.1	642.5	1.25	2.25	1.25	0.85	0.290	15.3	5.8	22.9
0303		2	66	151.9	43.4	18.8		78		83	0.939759				1.82	3.52	65.6	25.9	6.4	1.8	0.3	2.31	116	34.9	88.8	29.5	332	42.1	12.8	143	8.7	0.125	15.9	4.26	143.9	110.3	26.4	7.88	3.87	72	248	0.94	2.3	0.99	0.95	0.260	11	5.1	14.3
0304		1	27	171.2	97.7	33.3		108		112	0.964286				4.71	6.57	66.3	26.5	6.1	0.7	0.4	4.35	162	49.6	82.2	26.8	327	40.0	13.2	281	10.5	0.295	16.0	3.69	142.2	104.7	21.2	5.47	2.03	48.9	266	0.66	2.3	1.08	0.94	0.320	17.7	9.9	11
0305		2	33	160.8	81.3	31.4		97		114	0.850877					7.32	61.45	30.28	5.70	2.07	0.50	4.50	122.3	37.50	90.17	29.41	326.2	38.50	12.35	355.7	7.05			4.06	140.8	109.5	24.1	6.27	3.5	40	547	0.74	2.28	1.13	0.79	0.310	14.5	7.0	10.1
0306		2	33	168.4	195.9	69.1		169.5		169	1.00296				18.50	8.65	64.1	28.0	4.9	2.7	0.3	5.55	110	36.0	78.1	23.8	305	43.5	14.9	245	12.2	0.299	16.2	4.20	139.9	103.4	27	4.53	4.9	56.8	358.4	1.08	2.06	1.23	0.89	0.340	19.3	7.4	6.9
0307		2	31	160.4	73.9	28.7		91.5		105	0.871429					6.93	55.99	34.47	6.73	2.31	0.50	3.88	132.30	39.31	93.82	31.58	336.60	40.25	12.55	324.40	7.88			3.91	143.1	103.6	28.9	5.08	2.94	55	351.8	0.81	2.35	1.28	0.83	0.300	19.3	6.6	22.1
0308		2	29	164.1	82.8	30.7		99		116	0.853448					6.20	46.28	38.87	10.24	3.82	0.79	2.87	139.90	41.28	89.07	30.18	338.80	39.81	13.03	285.80	7.61			4.07	138.3	101.8	24	5.18	3.34	45.8	440.2	0.87	2.3	1.22	0.83	0.290	14.1	6.2	16.2
0309		2	23	153.7	105	44.4		123		129.5	0.949807					8.39	68.70	22.62	5.60	2.35	0.73	5.76	137.80	43.06	83.66	26.78	320.10	44.19	15.28	303.30	8.62			4.02	142.0	105.4	25.4	5.26	5.04	61.9	419.4	0.88	2.35	0.96	0.86	0.330	20.1	8.2	12.6
0310		1	65	173.5	87	28.9		101.5		102.5	0.990244				0.42	6.07	60.6	31.5	5.5	1.9	0.5	3.68	112	32.3	97.7	34.0	348	46.8	12.9	195	8.1	0.158	15.8	3.25	142.4	106.4	25.8	13.94	7.64	49	255	0.99	2.13	0.99	0.93	0.230	9.6	8	14
0311		2	34	159.4	91.8	36.1		111.5		111.5	1				26.85	8.93	59.8	32.1	6.0	2.0	0.1	5.33	122	36.6	90.7	30.3	334	48.6	14.4	183	13.5	0.247	16.3	3.81	141.5	109.6	24.7	5.22	3.96	56	319	0.86	2.34	1.2	0.81	0.320	18	6.8	13.1
0312		2	57	151.7	45.6	29.8		79.3		86.5	0.916763					4.41	53.17	34.93	7.70	3.26	0.94	2.35	124.00	37.36	93.19	30.92	331.80	40.25	12.64	199.20	9.15			3.76	142.5	110.3	25.5	5.97	3.41	48	203	1.01	2.3	1.41	0.91	0.280	14.8	5.7	13.2
0313		2	37	166.5	83.7	30.2		97		113	0.858407					7.03	51.24	38.30	7.75	2.15	0.56	3.60	117.70	35.33	82.98	27.64	333.00	39.81	13.95	195.20	9.15			3.66	139.0	107.6	19.9	5.78	3.19	36	381	0.77	2.12	1.51	0.87	0.310	16.8	8.1	3.8
0314		2	28	161.4	101.6	39		112.5		122.5	0.918367					9.54	57.39	32.02	6.83	3.17	0.59	5.47	131.10	39.44	88.79	29.51	332.40	41.56	13.50	404.10	7.45	0.05	0.005	4.26	140.7	106.6	23.5	5.36	3.02	46	485	1.01	2.15	1.27	0.85	0.320	16.9	8	14.4
0315		2	26	169.9	93.6	32.4		109.3		110	0.993636				2.22	7.44	61.5	32.4	3.9	1.6	0.6	4.58	136	40.3	83.5	28.2	338	38.0	12.2	337	9.8	0.331	16.3	4.23	138.2	102.5	22.3	8.11	4.66	33	506	0.75	2.34	1.29	0.86	0.310	17.7	10.2	4.3
0316		2	29	155.6	78.7	32.5		97		104	0.932692					7.94	59.89	30.53	6.66	2.26	0.66	4.75	155.20	45.09	95.54	32.89	344.20	41.13	12.40	226.00	8.02			3.94	135.8	101.9	19.6	9.32	4.33	57.6	543.3	0.82	2.41	1.37	0.8	0.290	16	9.2	20.4
0317		1	31	173	111.3	37.4		122		117.3	1.04007				11.37	5.24	53.9	39.5	4.2	2.1	0.3	2.82	150	44.6	88.2	29.7	337	41.2	12.6	244	10.8	0.263	16.1	4.24	141.1	106.9	22.7	4.72	4.72	63.4	478	0.82	2.22	0.95	0.91	0.290	18.1	10.1	22.5
0318		1	23	172	116.8	39.5					#DIV/0!					9.35	65.46	25.72	6.72	1.07	1.03	6.12	134.60	40.90	80.73	26.58	329.20	41.56	14.93	409.20	8.34			4.16	140.4	102.5	24.7	4.54	4.11	57.3	534.5	0.95	2.42	1.19	0.86	0.320	19.5	7.4	6.6
0319		2	28	159.7	115.4	45.2		121.5		135	0.9				12.87	10.00	58.4	35.9	3.6	1.4	0.7	5.84	118	38.3	73.8	22.7	307	42.9	15.6	390	8.9	0.346	15.6	4.42	139.3	101.3	25.8	5.55	3.95	65	651.7	0.94	2.28	1.17	0.81	0.350	22.6	8.6	4.6
0320		2	41	163.7	131.9	49.2		139.5		147	0.94898					9.36	67.68	22.46	5.18	4.15	0.53	6.33	136.60	42.33	86.40	27.88	322.70	46.38	15.54	332.40	7.99			3.81	140.5	104.4	19.8	6.01	6.53	64.6	657.5	1.2	2.24	1.21	0.87	0.340	21.8	9.5	15.3
0321		2	27	155.4	101.8	42.2		129		120	1.075					10.04	55.25	35.21	7.39	1.86	0.29	5.54	135.50	41.30	95.01	31.17	328.10	44.63	13.60	327.70	9.19			4.21	141.0	106.5	23.2	5.56	3.77	43	445	1.04	2.14	1.18	0.78	0.290	17	8.2	7.4
0322		2	29	150.2	63	27.9		100		96.5	1.03627					9.98	73.47	18.93	6.29	0.92	0.39	7.34	128.60	38.97	88.08	29.06	330.00	40.25	13.31	312.70	8.06			3.92	140.4	104.6	22.2	6.44	2.62	43.1	480.7	0.73	2.42	1.12	0.89	0.310	17.7	9.6	17
0323		2	28	159.7	112.7	44.2		127.5		134	0.951493					8.14	46.72	41.77	7.37	3.29	0.85	3.81	129.30	40.92	69.81	22.07	316.10	36.75	15.19	365.30	8.08			4.09	139.5	103.8	25.2	6.57	3.66	46	622	0.94	2.45	1.41	0.81	0.320	19.8	13	19.9
0324		2	35	158.7	67.5	28.8		96		105.5	0.909953					3.66	55.69	28.85	6.73	7.27	1.46	2.04	114.10	34.49	94.60	31.30	330.90	44.63	13.62	182.40	7.41			4.51	139.6	105.0	27.8	5.26	4.1	52	188	0.99	2.23	1.15	0.84	0.310	15.9	9.3	15.8
0325		1	21	174.1	159.4	52.6		152.5		145.5	1.04811					10.81	49.76	38.59	7.56	3.41	0.68	5.38	139.20	42.89	85.12	27.63	324.60	41.13	13.97	355.40	7.04			4.20	140.7	103.4	24.5	5.48	5.38	107	546	1.21	2.32	1.46	0.86	0.330	18.3	9.7	16.4
0326		1	29	157	97	39.4					#DIV/0!					8.30	68.09	25.61	4.74	1.15	0.41	5.65	168.80	50.49	90.93	30.40	334.30	40.25	12.90	318.00	7.27			4.74	141.3	104.8	24	5.59	4.35	86	686	0.98	2.45	1.22	1	0.320	15.1	9.6	15.3
0327		1	19	181.8	127	38.4		135		124.5	1.08434					8.72	63.7	23.5	6.8	5.2	0.8	5.56	139	41.0	81.4	27.5	338	39.8	13.1	356	9.4	0.335	15.6	3.66	141.7	108.9	21.4	5.63	2.56	76	433	1.22	2.28	1.33	0.99	0.360	20.2	9.3	8.1
0328		2	22	157.4	93.4	37.7		120		112.5	1.06667					8.18	60.80	31.34	6.19	0.89	0.78	4.97	139.90	42.14	92.49	30.70	331.90	38.50	11.97	242.30	8.24			4.15	143.1	104.8	26.2	5.14	4.36	57.3	347.8	0.9	2.33	0.91	0.86	0.340	20.8	7.5	9.6
0329		1	28	183.4	247.1	73.5					#DIV/0!					7.09	64.50	24.10	4.70	6.60	0.10	4.57	168.00	50.80	91.00	30.10	331.00	50.40	15.10	145.00	10.60	0.15	12.90	4.05	140.0	106.1	23.8	4.79	6.75	130	631	1.98	2.15	1.17	0.91	0.290	15.7	10	14
0330		2	33	165.1	91	33.4		110.3		110.5	0.99819					8.44	45.6	41.7	5.9	5.6	1.2	3.85	133	39.5	89.3	29.9	335	42.3	12.7	364	8.8	0.321	15.5	4.20	140.0	105.4	22.7	4.79	4.49	78	662	1.14	2.3	1.43	0.89	0.290	15.9	6.3	18.1
0331		2	24	154.7	75	31.3		105.5		116.5	0.905579					10.22	60.4	31.5	4.9	2.4	0.8	6.17	122	37.3	88.2	28.9	328	42.0	12.8	408	9.8	0.399	15.8	4.07	137.9	103.2	22.6	4.99	5.67	66	357	0.86	2.26	1.35	0.98	0.330	20.5	6.6	8.9
0332		2	33	158.5	73	29.1		94.5		103.5	0.913043				2.05	7.94	56.6	35.5	4.6	3.0	0.3	4.49	138	39.6	87.5	30.5	348	37.8	11.6	226	10.3	0.233	16.2	3.50	138.0	106.4	21.1	5.13	7.22	62	387	0.89	2.22	1.53	0.81	0.270	15.1	5.7	9
0333		2	33	170.6	110.2	37.9		114.5		125.8	0.910175					7.20	62.23	30.25	5.38	1.76	0.38	4.48	110.80	35.11	75.02	23.67	315.50	44.19	17.06	211.40	8.47			3.66	140.2	102.9	22.9	4.96	3.96	59	276	0.89	2.12	1.28	0.77	0.330	19.3	6	5.8
0334		2	28	167.1	83.8	30		101		107.5	0.939535				3.75	3.78	56.0	36.0	6.7	1.1	0.2	2.12	110	34.7	78.4	25.0	318	44.2	15.2	310	8.9	0.275	15.9	3.97	138.7	105.2	21.1	5.35	4.01	38.2	288.3	0.54	2.23	1.08	0.73	0.300	16.2	6.5	5
0335		2	23	159	76.2	30.1		102		106	0.962264				1.88	13.15	69.10	22.80	4.60	3.20	0.30	9.09	135.00	40.10	89.80	30.30	337.00	41.50	12.40	360.00	8.70	0.31	15.60	3.94	141.4	103.0	26.1	4.75	4.19	44.7	324	0.86	2.42	1.42	0.82	0.240	11.5	6.8	20.4
0336		2	23	170	133.4	46.5		134.5		130	1.03462					8.85	64.21	28.53	4.71	2.24	0.31	5.68	141.40	43.02	86.13	28.31	328.70	42.44	14.13	245.30	10.86			4.01	141.8	104.8	24.3	5.14	4.36	62	583	0.97	2.23	1.11	0.93	0.300	17.6	9.9	16.9
0338		2	37	157.7	75.1	30.2		101.5		104.5	0.971292					7.91	52.42	35.98	9.20	1.77	0.63	4.14	130.30	39.53	91.95	30.31	329.60	42.88	13.70	251.50	9.02			3.94	141.7	104.9	22.4	4.90	4.5	59	420	0.85	2.1	1.25	0.82	0.290	15.3	6.2	16.3
0339		2	29	166.2	101.4	36.7		104.3		121.8	0.856322					8.11	66.19	27.34	5.27	0.96	0.24	5.37	106.10	34.69	70.34	21.52	305.90	46.38	19.22	320.00	7.86			3.67	138.5	103.8	20.7	4.56	4.99	69	298	0.95	2.11	1.45	0.93	0.310	17.4	6.3	4.8
0340		1	23	170.1	116.9	40.4		118.5		129	0.918605					9.73	58.19	30.97	7.86	1.87	1.11	5.66	127.40	39.37	80.77	26.13	323.50	41.56	14.78	376.50	8.69			4.16	140.4	102.5	24.7	4.54	4.11	57.3	534.5	0.95	2.42	1.19	0.86	0.320	19.5	7.4	6.6
0341		2	28	164.8	125.8	46.3		134		143	0.937063					9.45	51.06	40.49	5.75	2.16	0.54	4.82	141.10	43.66	85.92	27.76	323.10	41.56	14.06	311.70	8.30			4.30	137.4	100.8	20.8	18.76	4.56	41.7	596.8	0.78	2.25	1.13	0.83	0.380	23.2	8.9	10.3
0342		1	16	175	140.4	45.8		136		139.5	0.97491					10.58	55.92	31.68	7.16	4.83	0.41	5.92	157.80	46.57	91.83	31.11	338.70	41.56	13.10	180.40	10.24			4.10	139.5	110.5	20.3	5.58	4.52	86	405	1.02	2.15	1.61	0.99	0.240	11.4	7.2	11
0343		2	33	156.5	91.4	37.3		107.5		118.5	0.907173					10.56	78.66	15.68	4.98	0.20	0.48	8.30	141.00	42.56	88.19	29.22	331.30	41.56	13.62	260.60	9.29			4.21	136.4	98.5	26.1	15.60	3.17	55.3	343.1	0.72	2.35	1.18	0.78	0.340	19.8	6.5	15
0344		2	32	154.6	71.2	29.8		101		107	0.943925				1.18	5.83	42.7	46.1	6.7	4.2	0.3	2.49	130	38.3	89.5	30.3	339	43.2	12.9	198	9.5	0.187	16.2	3.92	139.9	110.8	21.5	5.32	5.62	60	357	0.8	2.16	1.36	0.88	0.280	12.8	5.7	14.5
0345		2	36	153.3	75.4	32.1		104.5		111	0.941441				4.92	5.70	63.3	26.7	7.6	1.9	0.5	3.61	136	40.8	89.6	29.8	333	40.8	12.3	283	8.3	0.234	15.6	3.84	139.9	102.5	25.1	5.66	3.43	70	417	0.89	2.16	1.4	1.01	0.310	15	7.3	12.1
0346		2	41	161.3	95.8	36.8		125		113.6	1.10035					7.07	63.68	23.74	7.00	5.32	0.26	4.50	82.80	28.23	61.59	18.07	293.40	45.94	21.13	412.50	8.63			3.96	137.6	100.9	23.4	4.71	3.59	61.2	585.8	0.9	2.24	1.23	0.94	0.350	17.2	6.9	2.8
0347		2	16	158.6	78.9	31.4		102.5		106.5	0.962441					11.01	68.42	24.87	5.24	1.15	0.32	7.53	122.80	36.55	85.91	28.85	335.90	38.50	13.04	411.40	8.00			4.21	140.0	102.7	22	7.17	4.87	82	371	0.86	2.48	1.78	0.89	0.400	23.2	6.6	8.1
0348		2	38	171.9	116.8	39.6		116.5		135.5	0.859779					6.48	62.28	30.74	4.52	2.21	0.25	4.04	133.20	39.68	89.73	30.12	335.70	41.56	13.49	227.40	9.16			3.65	140.4	107.4	25	5.89	7.24	95	443	1.2	2.15	1.16	0.94	0.350	19.8	4.8	7.1
0349		2	30	158.3	103.5	41.3		130.5		121	1.07851					12.63	56.82	31.13	6.00	5.51	0.54	7.18	141.10	43.02	89.15	29.24	327.90	43.75	14.19	465.20	7.64			4.20	136.1	101.8	22.9	4.86	4.55	43.6	446.9	0.92	2.4	1.24	0.82	0.400	23.5	4.5	10.1
0350		2	29	163.5	98.6	36.9		116		125.4	0.92504					6.75	63.08	30.91	4.78	0.85	0.38	4.26	126.60	38.97	83.86	27.25	324.90	40.69	14.00	297.30	8.56			4.10	138.4	99.0	24.6	6.11	5.01	48.9	577.1	0.79	2.4	1.43	0.82	0.360	18.5	7.1	7.5
0351		2	38	158.8	98.7	39.1		127		125.5	1.01195					7.34	58.28	32.28	7.17	1.99	0.28	4.28	137.50	41.40	91.34	30.33	332.10	40.69	12.86	226.20	7.81			3.80	139.0	99.6	23.8	17.10	3.57	28.7	346.5	0.68	2.26	1.16	0.74	0.360	19.3	7.1	14
0352		2	37	159.7	99.6	39.1		113		130.5	0.8659					6.24	66.90	24.77	5.79	2.15	0.39	4.18	136.90	41.40	92.43	30.56	330.60	42.00	13.18	250.40	8.82			4.28	140.9	105.5	21.7	4.73	5.68	49.3	299.1	0.72	2.15	1.22	0.89	0.350	18.7	6.1	16.8
0354		2	45	156	93.8	38.5		108		116	0.931034					6.86	64.35	27.50	5.41	1.92	0.82	4.41	133.90	40.16	87.85	29.28	333.30	42.00	13.94	262.60	8.36			3.67	138.5	99.9	23.3	6.70	3.66	48.2	388	0.76	2.27	1.14	0.8	0.330	16	6.2	20.5
0355		1	29	166.8	110.5	39.7		121		120	1.00833					10.14	61.30	26.80	7.21	3.97	0.72	6.22	156.60	47.76	82.99	27.21	327.90	37.63	13.15	307.70	8.11			4.14	139.3	99.7	26	5.66	4.79	59.1	469.2	0.96	2.41	1.54	0.92	0.290	11.8	7.3	19.1
0356		2	28	167.5	100.6	35.9		102.5		122.5	0.836735					13.71	63.84	29.46	4.91	1.50	0.29	8.76	126.20	39.83	83.65	26.51	316.90	38.06	13.10	405.30	7.13			3.74	138.6	103.3	22.1	6.45	4.49	35.4	342.1	0.66	2.25	1.41	0.76	0.370	20.6	6.7	9.9
0357		1	39	179.1	116.6	36.4		114.5		122	0.938525					6.32	52.53	38.21	6.95	1.92	0.39	3.32	149.80	44.13	91.32	31.00	339.50	40.25	12.78	181.90	8.50			3.29	142.5	109.8	23	7.05	5.18	73	388	0.79	2.03	0.94	0.85	0.280	12.2	8.2	11.2
0358		1	42	164.5	75.7	25.4		91.5		99.5	0.919598					7.14	63.49	27.30	5.19	2.95	1.07	4.53	155.30	47.12	87.62	28.88	329.70	40.69	13.44	285.70	7.76			4.24	139.6	101.8	24	6.14	4.26	67.1	273	0.52	2.3	1.1	0.82	0.280	11.4	8.4	21.6
0359		2	34	169.3	89.6	31.3		101		117	0.863248					6.23	63.48	28.71	6.93	0.47	0.41	3.96	139.00	41.44	98.77	33.12	335.40	45.50	13.35	254.40	8.70			4.49	137.1	101.7	24.1	5.61	4.34	51.2	442	0.78	2.31	0.98	0.91	0.370	20	7.2	26.3
0360		2	46	160.8	85.1	32.9		111		119	0.932773					5.77	53.15	34.98	9.07	2.20	0.60	3.07	122.50	36.58	89.99	30.14	334.90	40.69	13.00	262.90	7.97			3.96	140.6	103.4	25.8	4.92	5.48	43.5	314.3	0.84	2.18	1.29	0.88	0.330	14.5	6.8	20.4
0362		1	34	177.6	140.4	44.5		147.5		129.5	1.139					6.38	67.17	22.59	7.86	2.06	0.32	4.28	157.00	47.74	86.04	28.29	328.80	45.06	15.22	243.30	7.99			3.15	139.4	103.6	25	9.51	5.07	103	554	1.16	2.15	1.21	0.82	0.360	19.9	6.1	12.9
0363		2	35	161.2	105.8	40.7		119		128	0.929688					5.61	55.98	35.29	7.08	1.39	0.26	3.14	124.30	38.20	91.43	29.75	325.40	42.00	13.38	198.50	10.09			3.71	140.2	101.6	25	3.08	3.42	66	292	0.94	2.06	0.93	0.89	0.310	12.3	6.4	13.9
0364		2	39	160.5	77.5	30.1		104.5		108	0.967593					6.86	53.25	35.92	7.62	2.19	1.02	3.65	108.40	33.63	82.13	26.47	322.30	46.81	16.26	546.50	7.53			4.13	140.4	107.4	23	5.13	3.79	71	322	0.86	2.27	1.19	0.89	0.280	10.5	9.8	5.2
0365		2	32	168	84.2	29.8		93		102	0.911765					6.85	47.29	38.42	4.73	8.42	1.14	3.24	124.70	36.97	84.88	28.62	337.10	36.75	12.45	247.60	8.60			3.55	139.0	107.4	18.9	5.83	6.94	76	351	0.76	2.16	1.23	0.83	0.480	32.3	6.7	8.4
0366		2	31	160.2	73.1	28.5		93.5		106.5	0.877934					7.20	54.43	35.05	6.83	3.16	0.53	3.92	120.00	37.99	67.60	21.35	315.90	36.75	15.63	250.10	8.70			3.68	138.5	105.9	19	5.66	3.03	62	383	0.83	2.04	1.32	0.87	0.360	16.1	7.9	17.6
0367		2	28	164.4	103.8	38.4		114.5		116.5	0.982833					7.99	73.62	18.16	6.97	1.05	0.20	5.88	105.40	34.66	60.15	18.29	304.00	42.44	20.40	290.00	8.38			4.21	138.9	103.0	23.3	7.67	3.7	84	469	0.85	2.35	0.99	0.85	0.360	17.7	8.4	8.7
0368		1	33	171.3	159.2	54.3		159		166	0.957831					7.84	66.18	24.75	7.69	0.98	0.40	5.19	167.30	50.49	92.98	30.82	331.40	45.06	14.10	137.50	10.87			4.10	139.8	107.8	21.7	7.11	4.3	78	444	0.98	2.25	0.98	0.93	0.34	17.2	8.6	25.1
0369		2	28	168.8	129.3	45.4		121		135.5	0.892989					5.97	58.44	31.71	6.72	2.61	0.52	3.49	106.40	33.72	76.66	24.18	315.50	43.75	16.40	307.60	8.94			3.78	139.5	103.5	25.5	6.34	4.25	73	500	1.02	2.23	1.14	0.9	0.380	20.1	10.9	6.5
0370		2	36	157.9	86.3	34.6		117		109	1.07339					8.34	61.00	30.20	4.80	3.50	0.50	5.09	139.00	40.30	85.70	29.60	345.00	38.80	12.40	363.00	9.40			3.89	140.4	111.7	23.3	5.84	3.44	79	462	0.89	2.33	1.4	0.95	0.330	19.4	7.9	12.6
0371		2	33	156.7	89.8	36.6		106.5		121.5	0.876543					10.79	71.11	21.59	4.71	2.04	0.55	7.67	135.00	41.12	92.23	30.28	328.40	45.06	14.29	412.90	8.22			4.17	142.9	113.5	22.8	5.21	4.6	72	400	0.84	2.35	1.2	0.94	0.410	23.8	10.3	9.3
0372		2	30	156.6	81.5	33.2		104.5		114.5	0.912664					3.98	52.31	37.95	8.18	1.22	0.34	2.08	142.50	43.25	88.83	29.28	329.60	38.50	12.67	273.70	7.57			3.71	135.0	101.8	22	4.76	3.34	38.1	405.4	0.73	2.36	1.02	0.95	0.340	18.2	8.6	16.8
0373		1	44	165	100.6	37		126		115.5	1.09091					6.20	45.67	39.01	9.12	5.96	0.24	2.83	152.50	46.12	95.71	31.65	330.70	42.44	12.88	174.80	8.14			4.03	142.7	105.6	26.1	4.83	5.4	76.6	524.1	1.1	2.25	1.05	0.75	0.290	12.6	8.3	27.4
0374		2	15	161.9	98.6	37.6		104.5		123.5	0.846154					7.45	63.24	28.40	6.30	1.66	0.40	4.71	113.30	34.50	98.63	32.39	328.40	51.63	15.03	169.90	9.16			3.84	141.9	107.4	22.9	5.28	6.84	64	432	0.91	2.31	1.72	0.95	0.300	13.3	7.6	9.9
0375		1	26	182.6	131.9	39.6		136.5		121.5	1.12346					6.44	65.75	26.61	5.49	1.57	0.58	4.23	163.50	47.68	88.90	30.49	342.90	40.25	13.08	168.10	9.64			4.32	144.1	105.0	27.8	4.94	4.72	76.3	527.2	0.95	2.43	1.17	0.83	0.340	17.1	11.3	13.7
0376		2	40	159.6	81.5	32		101.5		114	0.890351					5.87	52.05	37.59	7.46	2.19	0.71	3.05	138.00	41.06	98.20	33.01	336.20	44.19	13.14	196.20	9.49			4.07	140.6	103.1	26.6	5.08	6.34	36.2	323.1	0.62	2.31	0.99	0.87	0.360	18.9	7.8	18.8
0377		1	25	182.3	130.8	39.4					#DIV/0!					7.48	58.35	26.62	10.07	4.36	0.60	4.37	178.60	52.42	95.16	32.42	340.70	41.56	12.69	228.40	7.93			4.14	140.8	110.1	25.1	4.62	3.69	122	431	1.11	2.29	1.28	0.8	0.260	10.7	8.8	33.5
0378		2	25	159.2	105.8	41.7		110		133	0.827068					8.76	61.68	31.39	6.41	0.33	0.19	5.40	137.20	41.63	91.84	30.28	329.70	38.94	12.36	292.70	7.32			4.11	138.5	105.4	21.9	6.85	6.04	69	321	0.77	2.28	1.06	0.82	0.340	14.6	6.1	10.4
0379		2	19	161.2	109.8	42.3		122		126	0.968254					11.92	50.55	39.48	7.52	1.81	0.64	6.03	134.10	39.94	86.41	29.01	335.70	37.19	12.43	325.40	8.18			3.56	140.6	102.2	25.6	6.33	6.6	64	670	0.97	2.34	1.62	0.85	0.360	18.2	6.6	14.5
0380		1	29	177.6	100.1	31.7		113		109.5	1.03196				14.72	13.46	87.2	7.8	4.9	0.0	0.1	11.74	138	39.6	88.6	30.8	348	39.6	12.0	262	10.8	0.282	16.7	3.68	139.3	102.7	23	5.50	4.28	88	455	1	2.34	1.53	0.84	0.300	12.4	6.4	12.4
0381		1	36	171.5	139.7	47.5					#DIV/0!					6.78	71.05	21.05	7.08	0.41	0.41	4.82	144.30	45.22	85.66	27.34	319.20	52.06	17.92	142.90	9.12			3.77	130.6	95.3	23.8	5.05	7.8	146	668	1.52	1.9	1.28	0.78	0.450	27.8	4.1	5.7
0382		2	34	170.4	178.2	61.4		169.5		166.5	1.01802					7.75	57.99	29.81	5.34	6.05	0.81	4.5	131	40.54	87.09	28.14	323.2	38.94	12.89	314.9	7.78			3.92	140	103.6	27	8.47	3.57	69	411	0.87	2.21	1.47	0.76	0.38	19.9	7	11.6
0383		2	27	164.4	91	33.7		108		118	0.915254					6.28	52.36	39.94	5.08	2.09	0.53	3.29	132.40	40.01	91.47	30.27	331.00	41.56	13.37	376.40	8.31			4.42	137.3	101.3	24.7	5.56	3.94	78	375	0.83	2.53	1.39	0.76	0.350	16.7	10.4	23.7
0384		2	52	169.7	104.2	36.4		119.5		119	1.0042					6.24	51.54	38.61	6.82	2.51	0.52	3.22	143.00	42.18	97.09	32.91	338.90	42.00	12.59	160.80	9.24			4.04	141.8	105.8	24.9	9.34	7.52	81	322	0.86	2.23	1.56	0.8	0.310	16.7	7.8	17.7
0385		1	41	168.2	131.4	46.4		149.5		131.5	1.13688					6.36	62.33	30.20	5.90	1.45	0.12	3.97	156.80	46.24	97.50	33.06	339.10	42.44	12.61	230.60	9.02			4.05	139.1	101.4	26.3	9.35	4.24	52.9	461.6	1.2	2.27	0.8	0.77	0.360	19.2	8.6	38.3
0386		2	45	158.7	74	29.4		93		106.5	0.873239				3.93	11.91	79.7	13.8	6.4	0.0	0.1	9.50	127	38.0	92.7	31.0	334	42.6	12.3	203	9.0	0.182	16.0	3.99	143.9	107.9	22.6	4.94	5.77	92	312	0.8	2.23	1.41	0.78	0.310	14.4	11.5	25.7
0387		2	50	160.6	86.2	33.4		115.5		105.5	1.09479					6.84	54.67	34.01	7.55	3.13	0.64	3.74	125.90	37.68	93.01	31.08	334.20	43.75	13.62	180.90	9.01			3.77	142.5	110.1	24.1	6.20	4.48	79	375	0.83	2.25	1.32	0.87	0.340	17.1	6.6	12.2
0388		2	29	171.6	111.9	38		128		119.5	1.07113					8.15	63.15	28.70	5.65	2.03	0.47	5.15	125.10	38.82	84.95	27.37	322.20	40.25	13.72	346.30	7.40			4.22	136.8	106.4	22.6	7.86	1.93	33	249	0.74	2.07	0.55	0.87	0.350	19.9	8.2	14.8
0389		2	23	160.4	118.6	46.1		116.5		130	0.896154					8.62	61.65	29.99	7.17	0.96	0.23	5.32	131.50	39.44	94.41	31.47	333.40	41.56	12.85	258.10	8.76			3.90	141.1	107.7	25.2	6.17	6.18	82	426	0.87	2.26	1.1	0.89	0.380	21.2	9.3	13.5
0390		2	25	157.7	85.4	34.3		108.5		112	0.96875					8.50	57.04	33.72	7.53	1.44	0.27	4.85	128.90	39.20	90.08	29.62	328.80	39.38	12.59	267.10	7.75			4.15	139.6	109.6	23.4	5.30	5.58	54	372	0.76	2.24	1.09	0.89	0.340	16.8	7.5	11.6
0391		2	27	164.2	102.5	38.1		114.5		122.5	0.934694					7.54	60.19	29.92	7.62	1.78	0.49	4.54	128.30	39.22	87.03	28.47	327.20	41.13	13.58	287.90	8.62			4.13	142.8	110.3	26.1	5.14	6.97	70	481	0.97	2.37	1.54	0.83	0.370	20.4	7.6	8.6
0392		1	30	178	106.4	33.6		124.5		117	1.0641					7.55	67.37	25.25	5.73	1.56	0.09	5.09	140	41.11	91.78	31.27	340.7	41.13	12.99	298.9	7.81			4.24	139.5	102.1	22.2	9.63	3.41	21	402	0.66	2.35	1.12	0.81	0.33	15.5	10.2	19.6
0393		2	27	168.8	98.1	34.4		114.3		118.5	0.964557					7.16	38.69	49.14	7.73	4.06	0.38	2.77	116.20	35.84	86.30	27.97	324.10	45.50	15.24	244.10	9.64			4.02	142.0	112.5	24.2	4.99	4.16	43	377	0.77	2.22	1.08	0.83	0.330	16.5	10.2	6.7
0394		2	39	150.1	90.7	40.3		112		124	0.903226					6.88	56.50	36.75	4.09	2.41	0.25	3.89	124.30	38.23	84.87	27.61	325.30	40.69	14.01	296.10	10.06			4.20	141.4	111.2	24.7	5.06	4.44	37	402	0.83	2.34	1.29	0.9	0.360	18.4	9.3	12.3
0395		2	33	159.6	80.6	31.6		111.8		109.6	1.02007					7.48	69.54	22.12	6.60	1.54	0.20	5.20	120.90	38.18	69.98	22.15	316.60	35.00	14.49	262.50	8.37			4.27	141.5	103.8	21.3	5.54	3.02	58.5	429	0.79	2.24	0.97	0.85	0.340	16.9	9.1	10.2
0396		1	24	180.2	126.3	38.9		130.5		126.5	1.03162					9.09	66.46	24.86	7.10	1.55	0.03	6.04	156.50	47.20	86.83	28.79	331.60	38.50	12.92	246.30	8.16			4.25	139.2	111.4	21.3	5.40	5.93	60	385	0.84	2.37	1.53	0.93	0.340	15.6	10.5	15.3
0397		2	32	155.4	68	28.2		101		101.5	0.995074				10.73	12.44	83.8	10.6	5.5	0.0	0.1	10.43	139	41.4	84.7	28.5	336	36.7	11.6	245	10.4	0.253	16.1	4.15	136.4	108.6	21.6	6.47	3.34	43	198	0.63	2.18	0.93	0.72				14
0398		1	22	165	134.4	49.4		143		142.3	1.00492					7.65	82.42	9.64	6.33	1.34	0.27	6.30	187.00	57.18	98.05	32.07	327.00	45.06	13.25	223.20	8.87			4.82	138.6	99.2	35.8	9.47	4.83	73.1	541.9	0.94	2.29	1.56	0.88	0.400	22.2	9.5	14.9
0399		1	36	167.6	107.8	38.4		117.5		116.5	1.00858					12.84	66.60	24.36	7.06	1.86	0.12	8.55	161.00	47.96	97.43	32.72	335.80	42.88	12.88	223.90	8.59			3.95	143.6	103.4	22.8	6.35	5.64	67	446	1.04	2.26	1.44	0.8	0.270	13.4	7	17.6
0400		2	37	169.4	87	30.3		106		113	0.938053					7.30	70.19	22.11	5.72	1.69	0.29	5.13	143.10	44.34	89.98	29.03	322.60	39.38	12.75	381.70	8.79			4.07	136.9	98.9	23.6	5.99	3.3	44.5	426.3	0.71	2.47	1.1	0.88	0.380	20.8	11.9	15
0401		2	35	168.4	89.6	31.6		98.5		114	0.864035					6.04	62.57	29.09	6.87	1.39	0.08	3.78	112.20	34.55	82.71	26.85	324.60	41.56	14.48	267.80	9.09			4.11	141.9	102.5	23.2	6.31	5.79	44	230	0.66	2.11	0.89	0.79	0.330	16	7.2	5.3
0402		2	33	163.9	96.9	36.1		120.5		125	0.964					5.29	55.28	32.48	8.64	3.09	0.51	2.93	129.60	38.33	85.45	28.88	338.00	38.06	13.10	195.60	9.94			3.79	140.8	104.2	26.2	7.32	3.11	51.1	384.5	0.92	2.15	1.25	0.88	0.360	17.8	9.8	14.3
0403		2	45	156.7	71.6	28.6		96		105	0.914286					5.39	59.52	30.45	7.85	1.40	0.78	3.21	128.90	39.24	91.22	29.98	328.60	42.44	13.67	268.70	7.41			3.88	138.2	103.4	24.8	8.36	4.99	49.2	353.8	0.72	2.14	0.95	0.94	0.350	17.5	11.8	22.4
0404		2	37	160.4	73.9	28.7		104		102.5	1.01463					11.36	72.96	19.74	5.98	1.15	0.17	8.28	124.80	38.48	83.92	27.21	324.20	39.38	13.51	302.50	9.08			4.14	140.1	103.9	24.5	6.58	5.32	43.8	385.2	0.92	2.28	1.14	0.87	0.400	23.1	12.6	10.7
0405		2	24	158.8	92.9	36.8		111.5		119.8	0.930718					5.25	53.10	37.07	6.77	2.80	0.26	2.79	134.10	40.55	92.03	30.44	330.80	39.81	12.47	283.90	8.27			3.93	139.5	103.5	24.8	5.03	3.48	47.7	569.3	0.98	2.17	1.33	0.83	0.340	17.4	10.3	15.4
0406		2	31	160.4	94.8	36.8		133.5		126.8	1.05284					7.33	72.02	21.68	4.69	1.18	0.43	5.28	132.10	38.93	88.70	30.10	339.40	41.13	13.48	259.20	8.56			3.61	135.5	98.6	22.7	12.82	4.37	34.3	363	0.64	2.19	1.19	0.87	0.370	20	9.1	12.7
0407		2	31	163.4	106.4	39.9		116.5		124	0.939516					7.89	64.77	28.88	4.39	1.67	0.29	5.11	120.40	36.31	83.89	27.81	331.50	40.69	14.04	211.50	9.81			3.97	136.7	99.6	26.8	6.05	3.54	39.7	385.8	0.83	2.23	1.07	0.83	0.310	13.7	10.6	13.1
0408		2	32	153.9	78	32.9		103		109	0.944954					6.74	59.57	32.61	6.39	1.20	0.23	4.01	122.10	35.41	91.44	31.53	344.80	41.56	13.15	257.20	7.42			4.24	142.8	102.8	29.3	5.18	4.64	49.6	336.7	0.78	2.25	1.15	0.84	0.280	12.1	9.5	21.2
0409		2	32	161.2	111.4	42.9		131.5		129	1.01938					7.00	59.80	31.84	6.05	1.92	0.39	4.18	143.20	42.98	89.93	29.96	333.10	41.56	13.39	293.60	8.23			4.46	143.2	106.1	26.6	7.28	3.07	68	543	0.81	2.34	1.02	0.92	0.390	19.6	9.4	17.1
0410		2	57	156.9	91.3	37.1		118.5		118.3	1.00169					6.59	42.05	49.26	5.87	2.29	0.53	2.77	151.70	44.77	93.51	31.69	338.90	41.13	12.88	198.50	8.66			4.13	141.9	108.7	24.5	7.36	7.05	65	420	0.9	2.36	1.01	0.85	0.350	17.9	9.9	29.4
0411		2	30	167.1	91.7	32.8		102.2		116	0.881034					6.43	57.02	33.20	8.30	1.19	0.29	3.67	133	39.62	90.94	30.53	335.7	38.06	12.25	180.9	8.68			4.10	140.8	107.2	24.1	5.76	3.93	81	307	0.94	2.22	1.28	0.9	0.300	13.8	7.4	19.7
0412		2	35	166.8	97.8	35.2		108.5		122.2	0.887889					6.22	56.90	33.52	7.49	1.42	0.67	3.54	100.7	31.50	78.19	25.00	319.7	41.56	15.40	245.2	9.44			4.04	140.0	110.7	21.8	5.44	6.35	71	323	0.74	2.17	1.15	0.91	0.330	17	9.3	4.7
0413		2	34	163.3	90.3	33.9		112		120	0.933333					4.75	58.08	33.78	5.76	1.82	0.56	2.76	130.90	38.83	89.61	30.21	337.10	42.44	13.63	210.00	9.43			4.12	139.6	105.7	26.2	5.14	4.1	62	397	0.95	2.35	1.15	0.91	0.360	17.9	9	23.1
0414		1	21	176.3	116.2	37.4		112.5		116	0.969828					9.33	51.76	36.18	10.02	1.79	0.25	4.83	156.3	46.52	91.16	30.63	336.0	40.69	12.97	251.1	8.32			4.13	142.1	107.4	24.9	4.47	4.69	79	516	1	2.49	1.39	0.92	0.330	18.3	9.2	21.1
0415		1	28	192.3	246.7	66.7		183.5		174	1.0546					5.24	58.72	31.19	6.97	2.68	0.44	3.08	127.80	39.49	89.69	29.03	323.70	50.31	16.32	327.60	8.26			4.01	137.0	106.0	25.2	4.60	4.53	74	482	1.41	2.17	1.33	0.71	0.410	28.4	7.3	13.9
0416		2	16	165.2	113.2	41.5		121		130.5	0.927203					6.21	52.22	36.59	7.49	3.36	0.34	3.24	128.20	39.38	91.39	29.76	325.60	42.44	13.41	294.60	7.08			3.79	140.9	116.9	22.6	5.24	4.38	63	463	0.98	2.25	1.36	0.88	0.300	16.6	5.3	12.9
0417		2	28	168.9	92.2	32.2		106.5		118.5	0.898734					8.64	48.39	40.92	7.17	2.57	0.95	4.18	139.30	42.37	87.14	28.65	328.80	42.00	13.95	234.10	8.78			3.86	140.7	109.3	24	4.76	4.98	80	562	0.93	2.35	1.41	0.84	0.300	16.3	7.6	25.4
0418		1	49	173.2	108.9	36.3		122.3		116.5	1.04979					6.07	56.85	27.12	11.21	4.58	0.24	3.45	152.70	45.33	98.16	33.06	336.80	45.06	13.39	100.50	10.29			4.19	144.4	108.9	22.7	8.68	11.97	184	545	1.73	2.29	1.33	0.78	0.330	18.5	4.8	13
0419		2	21	163	89.8	33.8		116.5		110.5	1.0543					6.70	62.84	29.88	6.09	0.99	0.20	4.21	130.00	39.86	92.61	30.20	326.10	42.88	13.32	333.10	7.40			4.13	137.5	103.3	23.3	4.56	3.21	57.3	389	0.75	2.36	1.3	0.89	0.340	18.1	9.1	20.1
0420		1	29	166.3	129.5	47		139.5		128	1.08984					10.80	61.48	30.38	4.72	2.81	0.61	6.64	150.50	45.88	93.58	30.70	328.10	41.56	13.08	352.80	7.24			3.95	136.8	102.8	23.9	5.27	3.69	59.7	496.9	0.87	2.25	1.17	0.88	0.310	16.6	8.1	25
0421		2	16	146.3	76.4	35.7		106		107.5	0.986047					4.92	50.66	41.80	5.47	1.92	0.15	2.50	138.80	40.47	86.02	29.51	343.00	40.69	13.75	175.60	9.81			4.43	139.8	105.6	23.4	4.82	5.77	53	497	0.76	2.38	1.26	0.83	0.290	14.1	8.4	17.5
0422		2	28	172.8	127.7	42.8		138.5		146.3	0.946685					6.67	59.13	30.96	7.23	1.90	0.78	3.94	125.10	38.23	92.19	30.18	327.40	40.69	12.96	227.40	8.58			4.15	142.4	112.9	25	5.27	5.49	59	475	0.81	2.29	1.36	0.84	0.310	16.4	7.7	10.7
0423		1	30	169.3	112.9	39.4		125		120	1.04167					6.77	55.85	33.40	8.02	2.08	0.65	3.78	138.70	41.66	84.69	28.19	332.80	42.00	14.43	221.70	9.34			3.36	141.4	113.6	23.1	3.95	5.65	66	359	0.97	2.23	1.16	0.92	0.290	14.2	7.8	18.2
0424		2	34	160.2	120.4	46.9		147.5		141	1.0461					11.04	66.28	26.14	6.26	1.17	0.15	7.32	128.7	39.87	90.73	29.29	322.8	42.44	13.57	345.1	7.31			4.00	142.8	109.3	22.5	6.22	5.01	61	511	1	2.18	1.26	0.79	0.300	15.4	6.5	12
0425		1	13	178.7	109	34.1		108.6		112.5	0.965333					6.52	56.06	32.07	8.25	2.94	0.68	3.66	115.6	37.26	74.18	23.01	310.2	41.13	15.83	296.3	8.20			4.34	141.6	112.9	24.4	5.23	5.52	57	373	0.89	2.41	1.88	0.87	0.300	15.7	7.6	7.2
0426		2	29	162.3	103.9	39.4		126.5		117.3	1.07843				11.24	8.88	56.4	36.4	4.6	2.2	0.4	5.00	147	45.0	89.7	29.2	326	42.9	12.8	300	10.7	0.320	16.1	4.44	146.5	106.8	27.5	7.01	3.9	61	513	0.83	2.42	1.4	0.96	0.340	19.6	8.6	27.9
0427		1	31	178.4	120.8	38		124.5		117.5	1.05957				2.11	7.44	54.7	36.1	5.0	3.7	0.5	4.06	162	49.3	86.9	28.6	329	41.8	12.9	248	10.1	0.250	16.5	4.27	142.0	105.5	27.2	5.24	4.37	71	540	0.84	2.43	1.15	0.86	0.270	13.4	10	17.9
0428		2	26	160.3	97.3	37.9		118.5		121	0.979339					8.21	60.18	27.45	7.88	3.90	0.59	4.94	141.60	42.02	87.16	29.37	336.90	38.06	12.71	157.70	10.11			3.86	144.5	108.5	26.9	5.30	5.7	66	603	1.06	2.37	1.56	0.77	0.300	14.7	8.4	13.6
0429		1	33	181.4	147.1	44.7		147.5		123.5	1.19433				18.14	9.47	70.0	23.7	4.6	1.2	0.5	6.63	144	46.3	83.3	25.9	311	41.7	13.5	262	9.9	0.260	16.0	4.21	141.9	106.3	25.6	9.48	6.52	99	475	1.18	2.28	1.35	0.77	0.320	14.7	9.2	9.6
0430		1	15	178.4	124.2	39		120.5		125	0.964					11.84	67.17	23.94	7.20	1.25	0.44	7.95	144.90	42.94	90.25	30.45	337.40	41.13	13.09	402.60	7.70			4.31	145.4	106.7	27.5	4.52	5.12	61	598	0.89	2.37	1.58	0.92	0.280	14.4	9.1	17.9
0431		1	27	166.8	127	45.6		131.1		128.4	1.02103					5.31	58.45	28.86	10.44	1.85	0.40	3.10	170.20	51.08	98.85	32.93	333.10	46.81	13.72	186.70	8.63			4.16	145.3	108.8	28.5	5.31	4.76	77	519	0.8	2.26	1.11	0.91	0.210	9.4	7.3	26.4
0432		2	21	162.3	130	49.4		137.6		137.5	1.00073				15.72	12.05	71.40	23.20	3.10	1.80	0.50	8.60	145.00	44.80	92.30	29.80	323.00	44.40	12.90	373.00	9.50	0.35	15.80	4.17	139.0	99.5	24.9	4.60	4.62	61.1	564.6	0.97	2.28	1.3	0.93	0.350	20.4	7.1	21.2
0433		1	12	160.9	82.1	31.7		112		104.5	1.07177					7.31	50.05	38.68	6.82	3.94	0.51	3.66	154.20	46.94	88.66	29.13	328.50	43.31	14.10	277.00	8.73			4.55	141.5	106.5	22.1	5.85	4.23	43	321	0.91	2.45	1.76	0.89	0.330	17.8	12.1	26.1
0434		1	23	172.3	148.9	50.2		143.5		137.5	1.04364					7.61	61.11	29.77	5.94	2.62	0.56	4.65	159.30	49.37	88.19	28.46	322.70	41.56	13.61	158.90	12.35			4.11	142.5	104.2	24.3	5.25	4.18	58	595	0.98	2.31	1.37	0.83	0.330	18.8	10.2	31.3
0435		2	29	164.1	82.2	30.5		101.5		110.8	0.916065					6.48	51.97	36.35	8.76	2.53	0.39	3.36	132.50	40.05	96.13	31.80	330.80	44.63	13.55	238.50	8.46			3.81	142.1	105.6	26.1	5.26	5.51	49	327.3	0.72	2.17	1.19	0.84	0.240	12	9.8	19.2
0436		2	23	169.2	83.3	29.1		107.6		107.3	1.0028					11.34	56.24	35.35	6.47	1.59	0.35	6.38	134.70	40.72	95.42	31.56	330.70	42.88	13.09	332.70	8.83			3.81	137.1	104.9	21	4.31	3.1	39.3	257.8	0.73	2.15	1.14	0.79	0.300	18	6.9	24.2
0437		1	43	175	115.5	37.7		124.5		121.5	1.02469					6.52	48.49	37.78	8.00	4.98	0.75	3.16	146.20	44.37	89.73	29.57	329.50	42.00	13.46	244.00	8.53			4.05	140.7	104.7	22.8	5.49	3.37	50.4	373.6	0.79	2.15	1.47	0.86	0.300	16	9.8	19.6
0438		2	35	157.1	76.9	31.2		103.3		99.8	1.03507					6.69	60.08	30.04	6.46	2.83	0.59	4.02	138.10	42.22	89.54	29.29	327.20	40.25	13.03	214.90	9.16			3.71	138.2	103.8	22	5.07	3.96	46.2	401.5	0.75	2.11	1.08	0.94	0.330	17.9	7.4	19.4
0439		2	41	154.9	72.1	30		94		102	0.921569					7.52	57.37	30.54	10.23	1.51	0.35	4.31	130.50	38.77	89.92	30.26	336.50	39.38	12.80	267.50	8.00			4.05	138.1	103.3	22.4	6.00	6.42	53	442.3	0.93	2.24	1.29	0.88	0.290	15.6	7.4	33.1
0440		2	39	160.7	72.3	28.2		101		109	0.926606					5.32	61.89	28.72	7.05	1.59	0.75	3.29	127.50	38.27	92.10	30.68	333.20	43.31	13.64	303.40	7.66			4.38	135.8	103.6	22	4.97	4.88	57.7	366	0.7	2.24	1.22	0.83	0.330	20.6	10.1	20.3
0441		2	30	167.2	116	41.5		110		131	0.839695					9.59	66.5	27.4	3.9	1.9	0.3	6.38	119	37.7	89.2	28.2	316	46.6	14.0	287	9.1	0.261	15.8	3.86	142.2	108.2	25.5	6.24	4.59	63	436	1.02	2.25	1.46	0.83	0.330	18	6.6	8.8
0442		2	38	159.3	76.3	30.1		106.5		106	1.00472					9.03	58.2	38.6	1.8	1.3	0.1	5.25	138	42.1	90.4	29.6	327	43.5	12.9	233	11.1	0.257	16.6	4.28	139.4	102.2	24.8	5.07	4.24	43.4	341.5	0.61	2.31	1.03	0.87	0.430	31.2	6.6	28.4
0443		1	38	172.4	200.8	67.6					#DIV/0!					11.04	75.09	18.08	5.33	1.40	0.10	8.29	137.40	44.60	80.12	24.68	308.00	44.63	15.93	281.10	8.28			3.15	144.4	104.4	29.3	4.84	7.42	106	413	1.24	2.11	1.19	0.87	0.330	17.1	3.2	5.5
0444		1	25	181.3	164.1	49.9		147.6		160	0.9225					7.90	59.41	30.60	7.73	1.94	0.32	4.69	150.60	45.59	91.53	30.23	330.30	40.69	12.94	247.80	9.73			3.57	144.4	112.3	24.8	4.34	4.07	86	603	1.33	2.36	1.2	0.97	0.310	14.7	7.8	16.3
0445		1	26	165.4	149.7	54.7		135		148	0.912162				12.22	10.23	57.50	31.00	8.40	2.90	0.20	5.88	125.00	41.30	69.30	20.90	302.00	40.20	15.50	262.00	11.10	0.29	16.60	3.69	143.9	105.1	25.2	8.02	4.29	69	426	1.07	2.27	1.62	0.93	0.300	16.2	8.4	13.4
0446		2	44	162.6	129.6	49		145		152.5	0.95082				15.32	9.89	58.40	33.80	4.80	2.70	0.30	5.78	121.00	38.70	91.40	28.60	313.00	47.50	14.00	261.00	8.90	0.23	16.00	4.13	142.0	108.3	28.7	4.61	4.71	64	497	1.31	2.17	1.35	0.8	0.320	20.2	6.9	9.6
0447		2	43	163.2	114.1	42.8		123		126	0.97619				20.70	8.55	58.8	36.8	3.5	0.6	0.3	5.02	129	41.8	80.7	24.9	309	42.5	14.1	278	9.1	0.252	16.0	4.07	134.7	102.8	21.3	10.17	3.71	46.1	333.1	0.7	2.32	1.05	0.74	0.390	27.1	7.7	12.1
0448		2	37	153.1	77.1	32.9		99.5		110	0.904545				1.77	8.90	50.8	40.0	6.7	2.1	0.4	4.51	135	40.9	90.7	30.0	330	41.8	12.3	331	9.8	0.325	15.7	3.89	139.7	104.1	23.1	4.88	5.56	37.9	474.7	0.76	2.41	1.43	0.89	0.320	19.5	6.4	11
0449		2	18	173.3	110.4	33.5		121.5		125.5	0.968127				4.47	8.26	64.8	27.5	6.0	1.2	0.5	5.35	134	41.2	87.5	28.5	325	41.6	12.8	331	9.8	0.325	15.9	3.90	139.3	105.0	22.3	5.56	5.54	45.1	436.8	0.73	2.24	1.55	0.89	0.300	15.8	6.2	11.1
0450		2	34	157.5	104.1	42		120		125	0.96				10.66	10.86	68.4	23.1	3.9	4.2	0.4	7.43	132	41.4	78.1	24.8	317	38.8	13.3	387	8.4	0.327	15.4	3.62	140.4	105.6	23.4	5.48	4.57	34.8	429.9	0.76	2.18	1.15	0.8	0.290	14.7	6.1	9.6
0451		2	34	154.1	133.2	56.1		138		137	1.0073				8.76	7.17	58.60	33.60	4.90	2.30	0.60	4.21	101.00	34.00	74.30	22.10	298.00	47.20	17.00	349.00	9.20	0.32	16.00	4.21	139.5	104.2	24.1	6.17	4.48	56.6	383.4	1.24	2.17	1.36	0.94	0.340	21.7	7.9	8.2
0452		2	32	164.5	100.3	37.1		116.5		115.5	1.00866				20.85	6.43	69.2	25.1	3.6	1.8	0.3	4.45	154	46.9	84.4	27.6	328	38.4	12.2	365	9.8	0.358	16.3	4.50	135.9	96.4	25.9	17.64	3.23	43.9	349.3	0.72	2.44	1.3	0.75	0.380	25.1	7.6	12.8
0453		1	31	167.4	112.9	40.3		124		113.5	1.09251				4.95	6.86	53.4	37.3	6.4	2.5	0.4	3.66	165	50.3	93.3	30.5	327	45.5	13.1	247	10.0	0.246	16.0	4.30	140.8	103.2	24.9	6.30	5.19	67.7	453.7	1.1	2.37	1.32	0.91	0.310	16.3	10.2	25.8
0454		2	31	172.6	91.9	30.8		113.8		106.8	1.06554				2.43	8.36	58.2	31.6	5.1	4.8	0.3	4.86	143	43.4	92.4	30.5	331	41.5	12.0	274	9.1	0.250	16.0	4.08	139.3	108.8	22.4	5.56	4.56	42	331	0.73	2.15	0.95	0.85	0.340	18.7	6.3	15.9
0455		1	36	169.4	127.6	44.5		135		125	1.08				1.61	6.56	54.69	33.31	8.85	2.49	0.66	3.59	148.40	44.61	88.79	29.54	332.70	41.56	13.57	194.70	8.99			4.06	143.7	111.3	22.6	4.48	2.9	78	482	1.09	2.07	1.34	0.92	0.310	16.5	5.1	24
0456		1	32	187.3	153	43.6		136.6		132.5	1.03094				44.23	8.96	67.6	24.0	6.4	1.5	0.5	6.07	149	45.7	83.6	27.2	325	45.0	14.5	385	8.6	0.333	15.9	4.22	141.7	103.3	26.7	6.43	3.81	84	691	1.17	2.22	1.52	0.81	0.340	18.2	7.6	14.8
0457		1	18	188.2	117.2	33.1		117		121	0.966942				13.64	6.67	58.8	36.5	3.8	0.7	0.2	3.93	138	43.3	80.2	25.6	319	42.9	14.3	313	9.7	0.304	15.9	4.16	140.9	106.0	24.6	4.90	5.36	76	485	1.08	2.14	1.62	0.89	0.260	12.1	9.2	10.6
0458		2	52	164	113.9	42.3		122		124.5	0.97992				1.52	5.22	55.8	34.6	6.9	2.1	0.6	2.91	134	39.1	88.5	30.5	344	38.6	11.7	179	9.2	0.166	16.0	4.09	142.2	109.9	25.5	8.92	5.46	49	290	0.82	2.11	1.13	0.77	0.340	19.4	5.3	19.3
0459		1	31	178.9	253.1	79.1		201.5		188.5	1.06897				66.83	13.17	74.9	14.6	6.9	3.1	0.5	9.86	139	45.8	90.1	27.4	305	51.9	15.5	294	8.7	0.257	16.2	4.28	144.6	104.3	28	5.35	8.08	108	908	2	2.14	1.06	0.79	0.380	22.2	3.7	9.1
0460		1	27	154.4	120.5	50.5		152.5		153	0.996732				54.08	6.23	70.40	18.30	5.90	5.00	0.40	4.39	57.00	19.90	65.40	18.60	284.00	46.40	19.00	157.00	10.10	0.16	15.50	4.93	138.3	111.3	17.1	11.79	26.62	354	313	4.35	1.82	1.97	0.88	0.430	29	1.7	5.3
0461		1	33	175.7	119.3	38.6		116		121.5	0.954733				0.63	9.30	53.35	37.77	5.24	3.18	0.46	4.96	144.20	43.16	90.30	30.17	334.10	39.81	12.74	335.20	7.82			3.88	141.0	112.4	21.8	5.83	4.05	70	387	0.97	1.97	1.43	0.84	0.260	12.7	5.3	10.8
0462		2	30	158.3	88.3	35.2		102.5		106.5	0.962441				21.46	7.24	54.6	33.3	4.9	6.6	0.6	3.96	110	35.7	75.3	23.1	307	40.4	14.3	302	9.6	0.290	15.9	3.49	141.6	105.9	26	6.73	3.79	50	624	0.81	2.11	1.27	0.72	0.340	17.3	7.9	6.2
0463		2	24	156	73.5	31					#DIV/0!				5.03	8.33	60.9	26.7	4.3	7.6	0.5	5.08	129	40.4	82.4	26.4	320	42.5	13.8	357	8.6	0.307	15.5	4.14	143.5	109.9	25.2	4.82	4.34	55	389	0.92	1.95	1.59	0.78	0.310	16.6	7.3	22.4
0464		2	23	166.7	116.1	41.8		124		129	0.96124				19.38	12.85	67.9	26.5	3.9	1.5	0.2	8.72	122	39.8	75.2	23.1	307	38.5	13.7	332	8.5	0.281	15.7	4.11	140.1	103.2	27.3	9.39	3.99	53	419	1	2.06	1.08	0.86	0.360	20.2	7.2	8.7
0465		1	27	174.2	118	38.8		123		116	1.06034				2.39	6.82	56.34	33.20	7.00	2.77	0.69	3.84	148.30	44.02	89.73	30.23	336.90	41.56	13.50	316.50	7.25			4.18	140.8	108.2	22.1	6.33	4.01	70	476	0.9	2.03	1.53	0.85	0.280	13.1	7.1	7.4
0466		1	24	174.2	113.4	37.4		121.5		118	1.02966				2.88	9.07	58.54	34.01	6.43	0.72	0.30	5.31	145.20	43.78	85.14	28.24	331.60	42.00	14.27	287.40	8.58			4.04	140.9	110.3	22.9	5.04	5.44	88	558	1.07	2.09	1.6	0.83	0.320	15.2	5.9	7.7
0467		2	27	162.2	101.6	38.6		113.4		113	1.00354				7.62	7.53	63.0	30.1	4.8	1.7	0.4	4.74	135	40.8	87.5	29.0	332	39.8	12.2	256	9.5	0.243	15.9	4.14	138.4	101.7	18.8	12.34	5.84	41.8	462.5	0.73	2.51	1.29	0.73	0.320	16.9	6	19.5
0468		2	23	155.3	77.1	32		105.6		103.5	1.02029				2.01	9.93	67.2	26.5	4.7	1.4	0.2	6.67	142	43.0	90.7	29.9	330	39.3	11.6	262	9.4	0.247	16.0	3.91	139.6	105.5	21.7	5.42	3.53	46.7	449.2	0.91	2.32	1.18	0.83	0.290	13.9	8.3	22.3
0469		2	37	173.6	91	30.4		104		115	0.904348				1.99	3.49	32.4	52.1	8.0	6.6	0.9	1.13	86	29.3	65.6	19.2	292	41.4	16.8	357	9.1	0.325	15.9	4.62	136.5	107.4	19.7	5.31	2.73	51.5	348.2	1.23	2.21	0.81	0.92	0.370	22.5	6.9	3.3
0470		2	22	160.7	91.2	35.3		119		117.5	1.01277				4.83	8.59	69.3	20.5	6.8	3.3	0.1	5.96	130	40.3	94.9	30.6	323	46.8	13.2	290	9.1	0.264	15.7	3.63	136.3	102.7	23.4	5.02	3.58	54.4	453.7	0.74	2.35	1.1	0.95	0.310	16.1	6.9	18.7
0471		2	25	170.7	96.5	33.1		110		113	0.973451				2.93	8.91	59.3	32.8	5.6	1.7	0.6	5.29	120	36.8	86.3	28.1	326	40.5	12.6	276	11.1	0.305	16.1	4.06	138.0	101.6	23.1	5.18	3.61	45.5	487.3	0.97	2.35	1.16	0.82	0.310	16.3	8.9	18.4
0472		2	38	156	94.2	38.8		119		117.5	1.01277				5.45	11.03	69.7	22.4	5.9	1.8	0.2	7.69	108	34.9	76.6	23.6	308	47.1	16.4	407	9.4	0.383	15.6	4.08	142.3	105.8	23.6	5.41	4.02	61	420	1.2	2.21	1.3	0.84	0.340	19.4	6.8	7.5
0473		2	26	162.3	94.2	35.8		105.5		112.5	0.937778				1.31	7.97	65.9	26.7	4.9	2.3	0.2	5.25	146	44.8	86.5	28.1	325	40.4	12.5	359	8.4	0.300	15.7	4.14	139.1	103.6	23.3	4.98	4.18	44.9	480.9	1.01	2.36	1.1	0.9	0.280	15	10	14.5
0474		2	26	176.4	120.8	38.8		132		121.5	1.08642				16.88	7.62	63.6	32.0	3.4	0.6	0.4	4.84	139	41.1	88.5	29.9	338	39.9	12.1	327	8.4	0.274	15.8	4.13	139.7	103.2	23.3	5.62	7.07	43.4	527.7	0.9	2.37	1.28	0.93	0.350	19	8.9	14.4
0475		2	34	151.8	69.2	30		94.5		106.3	0.888993				3.88	8.71	62.6	27.7	4.8	4.6	0.3	5.45	140	43.3	87.2	28.3	324	40.2	12.3	295	9.9	0.293	16.0	3.71	143.2	103.7	26	4.58	3.39	60	350	0.78	2.24	1.25	0.86	0.340	16.7	10.7	20.6
0476		2	39	166.4	73.4	26.5		92.5		98.5	0.939086				1.41	7.21	56.5	32.0	5.8	5.2	0.5	4.07	138	43.5	84.2	26.8	318	40.5	12.9	302	10.2	0.308	16.4	4.19	139.9	104.2	25.6	11.24	4.39	49	361	0.6	2.28	1.12	0.87	0.340	15.5	9.5	14.8
0477		2	47	156.8	102.6	41.7		137		131	1.0458				7.39	8.00	63.9	29.1	5.8	1.0	0.2	5.11	127	38.9	82.6	27.1	328	42.3	13.7	272	9.2	0.250	16.2	3.94	134.6	96.3	26.7	7.06	4.07	43.4	529.9	0.98	2.24	1.07	0.88	0.370	18	9.1	11.3
0478		2	32	157.9	97.6	39.1		113		119	0.94958				4.58	6.42	55.2	36.4	5.0	3.0	0.4	3.54	131	39.9	88.9	29.3	330	40.8	12.2	225	9.2	0.206	15.4	4.01	144.8	112.7	24.9	5.02	3.23	56	380	0.67	2.07	1.06	0.89	0.280	12.3	10.4	16.8
0479		2	14	166.5	137.1	49.5		131		138.6	0.945166				9.25	9.32	52.0	40.5	5.2	1.9	0.4	4.85	128	40.1	85.4	27.3	319	41.6	13.1	336	9.4	0.316	15.6	3.86	138.6	103.5	22	5.12	3.39	48.2	475.6	1.2	2.16	1.62	0.76	0.310	16.8	9	11.8
0480		1	29	172	135.1	45.7		139.5		143.5	0.972125				3.01	8.54	50.80	44.20	4.00	0.80	0.20	4.34	165.00	49.20	89.20	29.90	335.00	39.00	11.70	263.00	8.80	0.23	16.00	3.72	141.1	106.9	22.8	5.65	6.03	62.4	465.6	1.01	2.06	1.12	0.91	0.280	12.6	9.1	17.6
0481		2	43	160.5	83.8	32.6		101.3		111.5	0.90852				2.52	5.72	42.9	44.1	6.7	5.8	0.5	2.46	132	39.8	92.6	30.7	332	41.7	12.1	179	10.4	0.185	16.4	4.26	142.0	108.5	23.2	7.04	5.95	54	474	0.71	2.17	1.28	0.92	0.270	11.1	9.4	13
0482		2	28	163	112	42.2		114		126	0.904762				9.61	9.10	57.9	33.8	4.7	3.2	0.4	5.26	130	40.0	86.6	28.3	326	42.6	13.2	338	10.0	0.338	15.8	3.69	141.0	103.6	23.6	4.72	4.32	55.7	559.2	1	2.25	1.52	0.85	0.320	16.6	9.5	13.7
0483		1	32	178.5	119.8	37.6		128.5		119.5	1.07531				13.94	18.56	89.71	8.00	2.15	0.04	0.10	16.65	129.40	38.19	94.65	32.06	338.80	46.38	14.09	550.50	7.47			4.42	138.0	101.1	21.1	6.95	9.02	73.9	778.8	1.27	2.17	1.24	0.98	0.360	18.7	8.7	8.3
0484		1	38	178.5	119.3	37.4		123.8		115.6	1.07093				3.76	6.38	61.8	29.9	5.3	2.5	0.5	3.94	179	52.8	88.3	29.9	338	40.3	12.2	213	10.5	0.224	16.7	4.12	136.9	99.3	25.3	17.07	5.29	64.4	332.5	0.89	2.31	1.26	0.81
0485		1	46	179.1	107.6	33.5		117		113.5	1.03084				1.23	6.20	57.0	35.7	5.1	1.7	0.5	3.53	170	50.5	89.9	30.3	337	39.9	11.9	188	10.1	0.189	16.5	4.16	139.8	101.8	26.5	9.40	5.44	65.2	450.7	0.79	2.43	1.39	0.78	0.290	18.5	8.7	18.1
0486		2	50	151.6	82.3	35.8		104.7		109.6	0.955292				3.42	9.06	53.7	39.5	4.8	1.7	0.3	4.87	130	40.2	86.9	28.0	322	41.0	12.6	354	9.1	0.321	15.6	4.22	142.3	109.1	24.7	4.96	4.75	57	305	0.78	2.15	1.31	0.88	0.330	18.3	6.5	16.5
0487		2	32	174.6	114.6	37.6		126.8		116.7	1.08655				12.70	7.95	57.3	34.8	5.3	2.0	0.6	4.55	117	38.8	78.8	23.8	302	47.9	16.3	425	8.9	0.379	15.4	4.25	137.5	103.0	23.4	8.66	3.86	42.1	239.6	0.76	2.26	1.12	0.75	0.360	21.8	7.4	4.1
0488		2	31	183.8	141.3	42		120		139.2	0.862069				9.81	6.16	63.1	30.2	4.0	2.4	0.3	3.88	136	42.5	87.0	27.9	321	41.4	12.8	320	9.1	0.291	15.7	4.17	136.2	101.5	22.9	5.83	3.47	53.8	337.6	0.92	2.09	0.94	0.8	0.330	18.6	6.5	12.9
0489		1	35	181.4	128.6	39.1		132.5		132.5	1				3.71	10.48	64.2	29.5	5.1	0.8	0.4	6.74	168	50.1	92.7	31.1	336	42.7	12.4	222	10.6	0.234	16.1	4.18	141.4	103.4	22.6	5.76	4.58	79.9	702.9	1.3	2.41	1.16	0.77	0.270	12.8	8.8	21.5
0491		1	41	171.4	128.1	43.6		136.5		135.5	1.00738				5.82	7.34	63.6	26.1	5.7	4.2	0.4	4.66	148	45.2	89.0	29.0	327	42.4	12.8	160	12.2	0.195	16.4	3.96	143.1	110.1	24.1	4.59	4.11	74	577	1.03	2.02	1.33	0.92	0.300	15.6	6.8	14.4
0492		1	33	147.2	13.8	52.5		130		130	1				5.99	8.46	64.3	28.0	7.2	0.1	0.4	5.44	167	52.8	90.0	28.4	316	43.2	12.9	233	9.7	0.225	16.3	4.18	143.7	108.2	24.8	5.32	4.93	64	578	0.95	2.23	1.32	0.98	0.180	6.4	6.4	12.1
0493		2	23	162	80	30.5		92.5		108.5	0.852535				1.34	6.64	62.8	30.2	5.4	1.2	0.4	4.16	142	41.4	84.1	28.8	342	37.1	11.8	298	9.0	0.268	16.0	3.82	138.4	105.4	21.6	5.51	3.53	44.1	324.8	0.78	2.32	1.27	0.82	0.260	9.3	5.1	18.8
0494		2	22	172.9	121	40.5		129.3		125.5	1.03028				9.38	9.78	70.3	21.7	3.7	3.9	0.4	6.88	131	41.7	83.2	26.0	313	39.8	12.8	359	9.7	0.349	15.8	4.10	141.0	105.4	24.6	5.65	2.81	46.8	426.1	0.9	2.22	1.11	0.81	0.340	19.5	7.7	12.7
0495		2	35	154.8	86.5	36.1		104		116	0.896552				2.87	5.87	46.20	47.60	4.70	0.80	0.70	2.71	139.00	43.10	88.30	28.60	323.00	39.90	12.10	277.00	10.10	0.28	16.20	3.57	142.1	104.4	25.9	5.44	4.06	66	387	0.86	2.12	1.14	0.89	0.300	14.5	9	12.1
0496		1	25	181.6	123.2	37.4		125.5		122.5	1.02449				5.93	11.00	62.10	32.00	4.60	0.90	0.40	6.83	163.00	49.50	87.20	28.70	330.00	41.00	12.60	242.00	10.10	0.24	16.40	3.65	142.3	105.2	25	3.19	5.21	99	517	1.07	2.3	1.2	0.87	0.290	13.7	10.1	20.9
0497		2	31	167.1	112.1	40.1		134		12.5	10.72				10.67	9.73	52.8	37.4	4.4	4.4	1.0	5.13	148	45.1	86.4	28.4	328	42.2	13.1	375	9.8	0.369	16.0	4.35	141.1	105.5	24.6	5.23	4.22	60	454	0.87	2.09	1.52	0.82	0.300	13.6	7.6	12.1
0498		2	26	157.7	102.5	47.2		118		124.5	0.947791				6.19	8.69	62.9	27.1	6.6	2.9	0.5	5.48	133	40.9	88.2	28.7	325	40.1	12.2	308	9.2	0.283	16.1	4.56	141.1	105.9	25.1	9.15	4.59	46	450	0.58	2.22	1.21	0.83	0.340	18.1	7.8	15
0499		2	40	164	72	26.7		100		102	0.980392				0.65	5.07	50.8	37.8	5.3	5.5	0.6	2.57	113	36.2	76.6	23.9	312	39.1	13.7	246	10.1	0.249	16.1	3.80	140.8	107.7	23	7.04	3.51	62	360	0.63	2.09	1.14	0.75	0.270	13.5	9	7.3
0500		2	39	161.6	127.5	48.8		131.2		138	0.950725				3.6	6.01	49.30	44.20	3.90	1.90	0.70	2.97	135.00	40.10	88.40	29.70	335.00	40.70	12.30	258.00	9.80	0.25	16.00	3.70	139.6	104.5	25.1	5.62	3.91	57.7	493.1	0.9	2.17	1.03	0.85	0.310	15.4	9.9	20.8
0501		2	38	159.3	89	35.1		105.3		114	0.923684				3.57	9.27	59.5	32.1	4.4	3.8	0.2	5.51	140	41.9	86.7	28.9	334	39.6	12.3	290	9.1	0.263	16.0	4.08	141.8	108.4	23.7	5.53	3.57	68	428	0.87	2.12	1.28	0.79	0.300	11.5	7.6	21.4
0502		2	39	155.9	110	45.3		108		126	0.857143				7.31	8.35	65.20	27.00	5.00	2.40	0.40	5.45	130.00	41.00	77.80	24.70	317.00	40.00	13.80	349.00	9.00	0.31	15.90	3.81	138.5	102.6	23.1	6.38	4.08	53.7	383.7	0.93	2.27	1.38	0.79	0.360	19.2	10	11.8
0503		2	33	162.5	116.5	44.1		135.6		125.5	1.08048				17.58	9.81	59.6	33.5	4.8	1.8	0.3	5.84	144	43.2	86.8	28.8	332	40.8	12.6	371	8.4	0.312	15.5	4.03	138.3	103.9	22.8	5.79	3.64	56	371	0.74	2.07	0.7	0.83	0.310	16.1	6.2	19.6
0504		2	36	156	105.5	43.4		130		127.4	1.02041				8.98	13.06	65.1	27.9	5.0	1.7	0.3	8.51	119	40.2	71.8	21.3	297	40.2	15.0	379	8.7	0.328	15.2	3.76	140.9	102.7	25.2	4.61	3.17	45	438	0.69	2.16	1.3	0.77	0.380	22.7	9	6.6
0505		2	26	158.1	120.8	48.3		128		133	0.962406				5.01	8.70	56.5	36.6	4.4	2.1	0.4	4.93	151	48.2	84.1	26.3	313	38.7	12.3	384	8.0	0.308	15.4	3.86	140.6	102.3	26	4.86	5.37	46	381	0.81	2.18	1.02	0.84	0.320	14.9	8.8	17
0506		2	26	166	153.8	55.8		141		145.6	0.968407				15.60	11.00	50.2	39.4	6.0	3.8	0.6	5.52	136	43.6	84.6	26.4	312	42.1	13.4	319	9.2	0.295	15.7	3.96	139.3	103.3	21.5	5.89	4.01	57.1	547.9	0.93	2.22	1.31	0.9	0.360	20.4	8.2	14.9
0507		1	33	170.6	11.3	38.2		118.3		115.5	1.02424				4.53	8.27	55.1	37.5	5.9	1.3	0.2	4.55	150	44.5	85.7	28.9	337	40.9	12.8	259	10.5	0.271	16.3	3.76	140.8	104.6	24	5.11	6.01	62	626.5	1.03	2.37	1.28	0.79	0.290	13.1	9.6	26.4
0508		1	29	183.4	129.1	38.4		125		126	0.992063				0.84	5.94	66.5	25.8	5.5	1.8	0.4	3.95	155	48.1	88.5	28.5	323	42.7	12.9	290	9.8	0.284	16.5	4.42	143.8	106.2	25.8	5.61	6.55	80	564	0.63	2.28	1.17	0.84	0.260	11.3	9.8	14.8
0509		1	36	168.1	114.5	40.5		125		122.5	1.02041				2.61	5.41	46.60	43.30	6.20	2.50	1.40	2.51	157.00	48.70	80.20	25.80	322.00	38.50	12.80	249.00	10.30	0.26	16.20	4.41	141.5	108.2	20.8	5.49	5.69	102	583	0.79	2.21	0.96	0.82	0.300	16.5	6	21.8
0510		2	23	158.6	87.4	34.7		103		113	0.911504				11.16	10.30	64.8	28.9	4.6	1.2	0.5	6.68	133	41.4	82.4	26.5	321	37.9	12.3	198	10.7	0.212	16.6	4.12	132.8	95.4	23.2	14.07	4.01	33.8	509.3	0.78	2.08	0.94	0.76	0.300	15.1	6.2	10.1
0511		2	24	155.3	68.4	28.4		97		99.5	0.974874				4.52	12.97	75.3	18.2	6.1	0.3	0.1	9.77	181	56.0	91.5	29.6	323	40.9	12.0	282	10.9	0.306	16.3	4.74	133.6	102.4	4.1	12.57	6.67	37.7	625.8	0.52	2.24	0.92	1.03	0.390	25.3	15.7	24.4
0512		2	48	163.5	94.6	35.4		107.5		113	0.951327				2.26	5.75	50.8	39.2	6.5	2.9	0.6	2.93	132	40.7	88.5	28.6	324	41.3	12.6	246	8.9	0.220	15.7	3.90	139.2	103.4	24.4	5.73	4.8	48.5	386.1	0.86	2.16	1.54	0.77	0.270	12	6.5	12.5
0513		2	32	161.1	85.1	32.6		106.5		113	0.942478				5.49	8.22	54.00	34.90	7.60	3.20	0.30	4.45	129.00	40.50	81.40	25.90	318.00	41.30	13.60	291.00	8.80	0.26	15.70	4.02	141.7	103.8	24.7	4.60	5.86	62	284	0.69	2.15	1.21	0.84	0.330	14.8	7	8.7
0514		2	32	168.3	95	33.5		109		120.5	0.904564				2.77	8.23	67.10	26.60	4.50	1.40	0.40	5.52	138.00	42.70	89.50	28.90	323.00	40.10	12.00	266.00	9.40	0.25	15.90	4.04	141.1	104.3	25	5.10	5.94	61	465	0.59	2.21	1.2	0.92	0.340	16.5	7.2	9.8
0515		2	42	177	111.7	35.7		115.5		129	0.895349				2.68	6.36	60.10	30.50	7.30	1.90	0.20	3.83	150.00	45.70	83.80	27.50	328.00	41.30	13.20	242.00	9.40	0.23	16.10	3.05	140.1	100.6	27	7.50	6.38	64	299	0.83	2.28	1.27	0.87	0.290	12.3	7.7	11.7
0516		2	26	159.4	84.4	33.2		107.5		110	0.977273				3.67	5.48	48.70	42.50	7.00	1.40	0.40	2.67	130.00	39.80	87.40	28.60	328.00	43.20	13.20	234.00	10.20	0.24	16.20	3.76	142.0	107.4	22.3	5.34	5.44	54	593	0.77	2.35	1.34	0.91	0.290	14	11.3	14.3
0517		1	29	169	130.9	45.8		145		131.5	1.10266				57.22	12.70	73.80	18.60	5.40	1.90	0.30	9.37	146.00	45.50	86.50	27.80	322.00	39.30	12.20	494.00	8.20	0.40	15.80	4.31	142.1	106.7	24.5	5.61	3.91	83	427	1.06	2.33	1.5	0.94				4.8
0518		1	41	175.4	141.1	45.9		143.6		138	1.04058				14.34	11.78	73.00	22.60	3.30	0.80	0.30	8.60	153.00	48.40	87.00	27.60	317.00	43.00	13.20	357.00	8.50	0.30	15.80	4.14	142.9	102.8	28.9	9.61	3.49	66	446	1.22	2.4	1.24	0.82	0.38
0519		1	41	182.3	233.1	70.1		185.3		194.2	0.954171				17.52	8.71	70.2	23.6	3.6	2.2	0.4	6.12	128	42.3	87.5	26.4	302	46.4	14.3	259	9.8	0.253	16.2	3.80	141.0	104.3	27.3	9.44	5.07	49	505	0.83	2.16	1.35	0.72	0.350	19.3	5.5	6.4
0520		2	29	169.3	92.5	32.3		111		117.5	0.944681				5.67	8.62	65.4	25.1	5.4	3.6	0.5	5.64	120	39.3	60.7	18.5	305	32.8	14.4	348	10.7	0.37	15.9	4.42	138.7	101.8	26.7	5.18	5.32	61	655	0.72	2.41	1.27	0.79	0.310	14.8	5.9	14.2
0521		2	36	158.4	97.4	38.8		110		119	0.92437				1.63	5.07	62.6	30.9	4.7	1.6	0.2	3.17	110	35.7	81.0	24.9	308	46.9	15.5	340	9.0	0.304	15.8	3.86	135.9	101.7	24.1	6.33	4.59	51.7	447.2	0.67	2.21	0.94	0.7	0.300	13.9	5	10.9
0522		2	41	163.2	99.5	37.4		110		116.5	0.944206				5.78	11.51	62.0	31.5	5.2	1.1	0.2	7.13	131	39.9	89.0	29.2	328	41.2	12.4	185	10.9	0.202	16.2	3.42	142.2	104.2	26.1	5.68	3.13	58.6	559.5	0.99	2.1	1.33	0.74	0.290	10.5	5.4	16.6
0523		2	21	159.2	132.1	52.1		149		148	1.00676				29.08	9.09	62.4	30.8	4.8	1.7	0.3	5.67	133	41.6	84.3	27.1	321	42.7	13.6	253	9.8	0.247	15.6	3.86	142.4	103.4	26.2	4.89	4.14	48.1	608.9	0.97	2.24	1.26	0.83	0.370	20.2	8.3	14.1
0524		2	49	149.7	118.5	52.9		136.2		142	0.959155				17.36	10.09	70.7	24.0	4.3	0.8	0.2	7.14	141	43.4	83.1	27.1	325.0	43.7	14.1	261	9.20	0.24	16.1	3.45	145.6	106.1	26.6	5.17	5.97	62	364	0.99	2.27	1.39	0.84	0.360	20.7	7.4	10
0525		2	65	161.7	85.4	32.7		117		104	1.125				3.70	7.32	60.4	32.3	6.3	0.7	0.3	4.43	142	42.9	91.4	30.2	331.0	42.2	12.4	179	11.1	0.20	16.6	4.29	144.6	109.0	23.6	8.99	6.4	94	531	1.34	2.31	1.38	0.85	0.320	14.9	6.9	14.9
0526		1	22	181.4	131.4	39.9		118		138	0.855072				3.01	7.95	50.9	31.0	7.6	9.9	0.6	4.05	142	42.8	87.7	29.1	332	41.4	12.7	305	8.5	0.260	15.6	3.65	146.0	107.2	26.4	5.27	4.67	83	548	0.98	2.25	1.3	0.92	0.260	10.1	13.2	20.4
0527		1	15	188.7	144.1	40.5		128		134.2	0.9538				17.08	9.44	64.7	26.2	6.0	2.6	0.5	6.10	138	42.7	84.5	27.2	322	41.5	13.2	276	9.9	0.273	15.8	3.93	144.8	108.2	25.3	5.03	2.58	74	505	0.76	2.17	1.46	0.91	0.320	14.7	8.1	11.7
0528		1	24	182.3	131.9	39.7		131.5		123	1.06911				7.73	6.75	61.0	32.1	4.8	1.5	0.6	4.12	156	47.0	84.3	27.9	331	39.1	12.4	133	10.8	0.144	16.5	3.79	140.5	105.1	22.3	4.43	3.55	64.1	501	0.74	2.17	1	0.82	0.280	10	5.8	18.9
0529		1	44	172.4	119.2	40.1		126.5		121.5	1.04115				2.45	7.98	63.9	29.2	5.1	1.7	0.1	5.09	159	47.3	91.6	30.8	336	42.9	12.5	160	12.6	0.201	16.8	4.16	138.2	103.7	23	5.18	5.17	57.6	721.2	0.9	2.26	1.2	0.82	0.320	14.1	11.2	23.1
0530		1	19	177.1	174.7	58.2		151		150.5	1.00332				7.39	7.40	49.2	40.6	7.3	2.0	0.9	3.64	148	47.1	67.4	21.2	314	36.5	14.5	239	10.3	0.246	16.2	3.97	140.3	102.4	24.3	3.84	4.66	68.7	929.8	1.09	2.36	1.39	0.82	0.320	16	8.7	22.3
0531		2	25	163.2	87	32.6		103.5		108	0.958333				3.16	8.56	54.3	37.2	6.5	1.3	0.7	4.65	134	43.6	68.3	21.0	308	34.7	13.6	338	8.3	0.279	15.6	4.19	139.4	104.8	25.1	4.53	5.41	63.4	534.8	0.93	2.26	1.28	0.85	0.320	15.7	6.4	17.4
0532		2	42	160.5	81.5	31.5		88		107	0.82243				0.91	8.35	53.6	35.7	6.0	4.4	0.3	4.47	136	41.3	90.6	29.7	328	43.3	12.8	233	11.4	0.264	16.5	3.64	136.7	104.1	22.7	4.36	4.96	66.1	293.2	0.87	2.1	1.16	0.89	0.270	12.4	6.2	15.3
0533		2	31	151	73.4	32		101		105	0.961905				2.40	5.40	43.2	46.0	6.7	3.6	0.5	2.34	134	42.6	85.4	26.8	314	42.9	13.5	263	9.2	0.242	16.2	3.74	145.2	108.6	25.7	4.90	3.62	84	411	0.9	2.07	1.15	0.91	0.310	14.1	7	8.3
0535		2	38	163.5	74	27.7		100		106	0.943396				2.10	5.56	62.5	25.8	7.4	3.7	0.6	3.48	121	36.2	89.3	30.0	336	41.5	12.4	263	10.9	0.286	16.2	3.77	143.5	110.2	22.5	5.37	4.36	64	279	0.72	2.01	1.4	0.9	0.280	11.1	8.4	9
0536		2	49	160	95.5	39.8		133		130.7	1.0176				4.81	7.50	64.8	29.2	4.3	1.7	0.0	4.86	148	44.6	92.5	30.6	331	43.0	12.5	199	9.3	0.185	15.7	3.58	143.6	107.3	24.4	5.68	4.29	50	335	0.83	1.99	1.15	0.78	0.310	12.7	4.6	18.1
0537		2	21	168.9	101.9	35.7		115		123.5	0.931174				7.10	9.61	54.7	36.0	6.5	2.5	0.3	5.26	148	44.8	90.8	30.1	332	41.2	12.1	356	9.3	0.330	15.8	3.69	138.7	100.1	24	3.67	3.77	68	377	1.05	2.16	1.4	0.88	0.330	16.7	8.3	21.6
0538		1	29	171.2	126.2	43.1		124		133	0.932331				15.40	8.78	50.9	39.4	7.3	2.1	0.3	4.47	152	45.1	89.7	30.2	337	42.1	12.6	279	10.5	0.295	16.3	3.90	143.4	103.3	28.1	5.10	4.66	94	431	0.99	2.08	1.11	0.89	0.340	17.1	9.6	11
0539		1	18	179.9	146.3	45.2		145.5		137.3	1.05972				6.78	9.32	63.0	30.2	5.8	0.8	0.2	5.88	158	46.8	91.5	30.9	338	41.9	12.3	225	10.5	0.236	16.1	4.03	143.0	107.9	26.1	3.86	3.37	65	468	0.96	2.17	1.51	0.84	0.300	13.6	8.7	27.3
0540		2	46	165.7	83.5	30.4		99		107.3	0.922647				5.68	5.56	55.6	36.6	4.6	2.3	0.9	3.09	130	39.8	85.6	28.0	326	40.1	12.5	221	10.1	0.224	16.0	3.65	143.7	107.4	27.4	4.30	5.68	72	302	0.96	2.13	1.04	0.87	0.330	16.4	7.1	20.7
0541		2	49	165	93.7	34.4		112		115.5	0.969697				2.68	5.52	55.00	38.20	4.70	1.70	0.40	3.04	137.00	41.80	88.30	28.80	326.00	42.70	13.00	332.00	9.70	0.32	16.00	3.81	141.5	107.7	24.1	6.21	2.98	53	441	0.83	2.09	1.22	0.94	0.300	11.8	9.3	13.8
0542		2	27	160.3	80.3	32.8		99.3		119.6	0.830268				4.10	6.72	55.4	37.3	5.3	1.5	0.5	3.72	131	38.8	80.7	27.2	337	38.6	12.8	226	9.2	0.208	15.8	3.96	143.6	109.0	25.3	4.91	4.79	63	330	1.07	2.08	1.22	0.87	0.310	18.2	6.6	10.6
0543		1	46	168.1	92	32.6		106		102.5	1.03415				2.21	7.63	65.2	27.8	4.8	1.7	0.5	4.97	174	51.8	89.9	30.2	336	41.4	12.3	242	10.3	0.248	16.3	3.98	137.4	103.3	23.6	11.06	5.63	77	351	0.71	2.23	1.27	0.87	0.330	16.8	9	13
0544		2	33	166	87.5	31.8		99		109	0.908257				0.87	8.82	58.4	35.2	4.6	1.4	0.4	5.15	140	42.4	87.3	28.8	330	43.5	13.4	416	8.6	0.356	15.5	3.77	143.4	106.5	27.2	4.33	2.88	73	374	0.72	2.15	1.22	0.86	0.290	11.9	9.1	19
0545		2	20	166.5	137.6	49.6		143.5		135	1.06296				25.73	8.59	67.0	28.3	3.3	1.1	0.3	5.76	144	45.1	84.5	26.9	318	40.5	12.9	325	10.1	0.329	15.9	4.37	138.8	105.2	23.9	11.33	4.7	71	387	1.1	2.27	1.15	0.82	0.350	21.7	6.4	20
0546		1	31	173.9	158.1	52.3		164.5		138.5	1.18773				46.33	16.11	67.2	22.8	3.2	6.3	0.5	10.83	161	47.8	81.2	27.3	337	40.7	13.4	368	8.9	0.329	15.9	4.24	136.0	92.4	30.5	10.93	3.02	48.7	581.9	1.22	2.29	1.33	0.82	0.410	27.4	8.7	11.6
0547		1	33	163.4	88.4	33.1		108		106.5	1.01408				2.79	7.50	54.6	36.4	5.1	3.6	0.3	4.10	162	47.0	83.6	28.8	345	38.9	12.4	204	9.2	0.189	16.0	4.13	142.6	108.0	25.2	6.44	4.45	59	553	0.71	2.15	1.21	0.9	0.260	12.9	10.2	18
0548		2	45	165.2	90.5	33.2		123.5		109	1.13303				11.48	5.70	61.8	30.1	3.9	3.8	0.4	3.52	129	38.1	90.5	30.6	339	41.2	12.2	241	10.3	0.249	16.2	4.02	145.6	111.3	25.8	5.25	5.52	72	421	0.89	2.19	1.23	0.93	0.340	18.5	8.7	16.8
0549		1	19	186	162	46.8		135.5		140.5	0.964413				9.93	10.25	67.00	25.70	5.20	1.60	0.50	6.88	175.00	50.20	84.30	29.40	348.00	38.10	12.10	388.00	10.10	0.39	16.20	4.02	137.0	98.1	22.6	17.03	4.26	49.4	569.7	0.9	2.38	0.89	0.81	0.340	19.4	9	18.3
0550		2	21	152.8	127.2	54.5		136		139.5	0.97491				24.89	12.31	61.30	33.30	4.20	1.00	0.20	7.55	161.00	50.10	90.70	29.20	322.00	43.30	12.80	230.00	9.40	0.22	16.00	3.24	143.0	101.4	29.9	4.77	8.01	57	441	0.94	2.26	1.89	0.78	0.350	21	8.2	14.6
0551		2	37	161	85.4	32.9		106		117	0.905983				0.66	6.09	55.5	34.0	6.5	3.5	0.5	3.38	121	37.9	70.7	22.6	320	37.8	14.3	322	9.2	0.296	15.5	4.05	141.4	106.0	27.3	5.51	4.01	52	363	0.66	2.13	1.14	0.89	0.280	12.2	8.4	30.4
0552		1	22	169.7	130.6	45.4		135		122.5	1.10204				2.43	8.11	64.20	28.00	5.40	2.10	0.30	5.21	174.00	51.30	92.70	31.40	338.00	42.50	12.30	269.00	10.50	0.28	15.90	4.38	143.3	107.1	25.8	5.60	3.76	88	584	1.09	2.23	1.82	0.94	0.240	9.2	10.2	21.9
0553		1	32	180.7	139.2	40.8		134.2		124	1.08226				5.93	8.12	50.9	37.5	6.5	4.8	0.3	4.14	135	40.4	84.7	28.3	334	40.9	12.9	175	9.1	0.159	15.9	3.70	139.6	104.0	24.1	7.09	5.22	63	563	0.71	2.19	1.37	0.75	0.310	12.9	11.6	9.4
0554		2	21	162.6	109	41.2		108.3		126.3	0.857482				5.97	7.85	44.20	46.00	5.90	3.30	0.60	3.47	138.00	43.10	89.10	28.60	321.00	43.10	12.90	255.00	9.70	0.25	16.30	4.12	141.1	103.9	23.9	5.53	4.2	53.3	527.2	0.97	2.37	1.46	0.95	0.360	22.1	7.8	13.2
0555		1	27	172.6	113.7	38.2		127		121	1.04959				17.71	11.29	70.00	23.40	4.80	1.30	0.50	7.90	155.00	47.30	92.20	30.20	327.00	45.20	13.10	345.00	9.30	0.32	16.20	4.36	138.4	102.6	23.1	5.92	4.81	68.2	556.3	1.02	2.44	1.19	0.85	0.360	22.6	9.9	22.1
0556		1	37	170.8	101.8	34.9		111		114	0.973684				2.27	7.53	29.3	61.6	5.1	3.6	0.4	2.21	134	40.6	85.8	28.3	329	37.2	11.6	268	9.5	0.255	15.9	3.79	140.0	102.7	26.1	11.42	4.43	69.9	203.4	1.11	2.25	1.07	0.8	0.280	11.6	11.6	16.3
0557		2	16	161.2	110.6	42.6		121.3		128.5	0.943969				14.54	11.28	66.4	25.7	5.4	2.0	0.5	7.48	129	39.6	88.5	28.8	325	41.3	12.5	351	8.7	0.306	15.9	4.06	138.2	102.0	24.3	4.62	4.68	58	356	0.92	2.23	1.47	0.92	0.340	14.7	10.6	7.6
0558		2	37	160.8	76	29.4		101.5		106.7	0.951265				2.54	9.08	55.6	37.0	5.3	1.7	0.4	5.05	130	39.8	86.5	28.4	328	43.9	13.6	349	9.2	0.323	15.9	3.39	142.0	106.5	23.9	4.33	4.25	45.7	383.6	0.66	2.02	1.03	0.82
0559		1	23	175.2	158.3	51.6		143.5		143	1.0035				10.69	9.93	56.3	35.4	4.9	3.0	0.4	5.58	155	48.4	87.4	28.0	320	40.9	12.6	365	8.9	0.324	15.8	4.08	140.1	102.2	24.2	6.45	3.49	57.7	465.8	0.99	2.32	1.31	0.76	0.330	15.7	10.1	16.4
0560		2	28	169.9	123.6	42.8		122.5		129	0.949612				9.07	7.51	62.70	26.30	5.30	5.20	0.50	4.70	144.00	44.00	83.00	27.10	327.00	41.10	13.20	371.00	11.10	0.41	15.90	4.33	137.4	100.4	24.4	4.76	3.99	59.1	445.9	0.8	2.29	0.91	0.84	0.340	16.8	10.9	12.9
0561		2	36	165	95.4	35		117.5		119	0.987395				3.06	5.77	59.90	30.80	5.50	3.30	0.50	3.45	141.00	43.70	92.80	29.90	323.00	43.10	12.50	263.00	9.10	0.24	15.70	4.11	141.8	106.7	27.2	5.39	3.74	70	373	0.79	2.07	0.91	0.94	0.330	17.2	9.4	15.2
0562		1	33	183.5	158.3	51.6		143.5		131	1.09542				10.91	10.27	68.0	17.6	7.0	6.9	0.5	6.98	147	44.3	86.5	28.6	331	41.2	12.8	332	9.6	0.318	15.7	4.01	138.4	104.0	21.8	5.77	4.54	63.3	718.3	1.04	2.26	1.19	0.83	0.330	16.4	9.4	10.9
0563		2	42	158.7	89.4	35.5		100.5		112.4	0.894128				3.96	6.15	57.10	34.10	6.30	2.10	0.40	3.51	135.00	39.40	92.00	31.50	343.00	42.90	12.50	217.00	10.50	0.23	16.40	3.32	142.2	107.5	25.1	4.72	4.06	63	477	0.87	1.95	1.07	0.85	0.320	15	6.8	13
0564		2	12	162.8	89.7	33.8		105.2		112	0.939286				3.02	8.85	55.2	34.5	6.4	3.5	0.4	4.88	144	43.0	84.4	28.3	335	37.9	12.0	355	9.6	0.342	15.6	4.11	143.0	107.0	23.7	4.57	4.53	51	384	0.83	2.12	1.64	0.96	0.290	14.1	7.8	11.1
0565		2	38	154.2	102.9	43.3		116		125.3	0.925778				9.73	7.95	62.3	31.5	4.6	1.3	0.3	4.96	141	41.9	94.8	32.0	337	43.7	12.3	182	11.0	0.200	16.3	3.54	138.5	103.6	24.3	4.78	4.14	58.2	447	1.02	2.18	1.29	0.93	0.300	13.8	8.5	24.2
0566		1	29	187.8	144.5	41		131		121	1.08264				5.24	8.30	68.3	26.4	4.5	0.5	0.3	5.68	163	47.4	90.0	31.0	344	40.3	12.0	158	11.1	0.174	17.2	3.96	140.3	106.5	26.7	10.53	3.42	63	359	0.84	2.04	0.91	0.87	0.270	12.4	7.5	20.7
0567		2	19	169.9	134.8	46.7		144.5		143	1.01049				16.31	11.98	57.10	35.40	3.80	3.10	0.60	6.84	115.00	36.30	57.60	18.20	316.00	35.80	16.60	390.00	9.30	0.36	15.60	3.73	143.2	107.6	22.9	4.52	3.33	64	549	1.15	1.98	1.36	0.89	0.370	21.2	7.9	12.7
0568		1	35	173.2	113.5	37.8		119		120	0.991667				6.44	11.78	65.3	25.9	3.9	4.4	0.5	7.69	163	48.1	88.5	29.9	338	41.1	12.4	272	9.7	0.265	15.8	3.96	141.9	102.0	24.9	8.04	5.11	77	460	0.89	2.21	1.17	0.83	0.290	16.8	10	27.6
0569		2	32	155.4	77.1	31.9		105.6		112	0.942857				5.60	7.53	61.4	30.4	6.3	1.2	0.7	4.63	140	41.7	87.3	29.2	335	40.2	12.3	237	11.7	0.276	16.4	3.67	142.0	107.0	21.1	5.49	4.13	62	482	0.71	2.18	0.99	0.88	0.290	14.7	7.3	11.1
0570		1	15	170.6	105.5	36.2		113.5		120	0.945833				3.66	8.16	60.70	30.50	5.90	2.80	0.10	4.95	162.00	47.40	87.90	30.00	341.00	40.10	12.20	301.00	10.00	0.30	16.10	4.30	142.6	107.4	23	4.99	5.25	69	377	0.87	2.26	1.36	0.87	0.150	8.1	9.2	19.2
0571		1	19	177.6	119.6	37.8		113.3		133	0.85188				2.83	9.27	50.7	38.2	7.1	3.4	0.6	4.69	161	50.5	87.2	27.9	320	44.1	13.6	275	11.0	0.303	16.2	4.28	140.9	105.5	23.3	4.84	4.97	69.2	791.8	1.03	2.3	1.45	0.82	0.290	15.3	8.7	27.2
0572		1	39	175.7	134.6	43.6		139		127	1.09449				9.54	9.75	59.4	30.2	6.1	3.5	0.8	5.80	172	50.0	88.6	30.6	345	43.8	13.2	287	11.1	0.319	16.7	3.68	143.2	100.9	29.3	11.15	4.5	70	658	0.98	2.21	1.64	0.89	0.320	15.4	12.4	26.1
0573		2	57	160.8	78.7	30.4		104		107.5	0.967442				1.86	6.46	52.9	41.0	5.2	0.6	0.3	3.41	129	38.0	93.5	31.6	339	41.2	11.8	275	8.9	0.246	15.7	4.18	141.5	107.8	24	5.65	7.02	68.4	597.9	1.27	2.1	1.11	0.82	0.330	16.1	9.2	12.8
0574		1	23	171.2	104.6	35.7		122		112	1.08929				5.35	5.89	47.5	42.3	6.3	2.7	1.2	2.80	156	47.3	81.6	27.0	331	39.1	12.8	270	9.0	0.242	16.0	3.85	143.7	106.8	23.9	7.35	5.12	69	447	0.87	2.29	1.51	0.86	0.320	15.6	9.4	21.3
0575		2	19	149.3	91.8	41.2		113.5		121	0.938017				11.69	8.48	64.0	28.1	5.3	2.2	0.4	5.43	106	33.5	75.9	24.0	317	39.1	13.8	286	10.4	0.296	15.8	3.55	139.6	106.7	23.2	4.50	3.34	56.1	456	0.89	2.09	1.35	0.75	0.340	23	7.7	9.3
0576		2	31	158.9	74.5	29.5		92		105	0.87619				<0.50	6.74	58.48	32.00	7.16	1.12	1.24	3.94	95.70	29.50	84.30	27.34	324.30	44.19	15.25	209.80	10.03	0.02	0.002	3.52	140.0	98.1	25.3	4.26	3.33	51	301	0.56	2.01	1.3	0.83	0.270	12.3	8.4	10.3
0577		1	25	165.2	131.9	48.3		130		135	0.962963				7.91	8.57	56.62	33.67	6.07	3.08	0.56	4.85	146.60	43.16	87.27	29.64	339.70	42.00	13.89	240.10	8.07	0.04	0.003	3.69	137.4	94.1	22.8	6.72	4.02	62	630	0.67	2.04	1.46	1.02	0.310	14.2	8.8	18.7
0578		1	27	173	144.3	48.1		140.5		139.5	1.00717				12.33	8.38	53.25	35.42	9.18	1.11	1.04	4.46	138.50	42.69	93.34	30.28	324.40	45.50	14.19	258.40	9.31	0.04	0.003	4.14	141.1	98.8	23.3	6.27	3.6	82	618	0.62	2.18	1.34	1.02	0.330	17.9	9.7	11.4
0579		1	19	175.1	116	37.8		119.5		121	0.987603				1.92	5.34	56.68	30.87	10.25	1.36	0.84	3.03	147.90	44.24	86.49	28.93	334.40	42.44	14.15	275.40	9.33	0.08	0.004	3.94	140.3	97.1	24.4	5.13	3.23	96	630	0.74	2.24	1.21	0.88	0.280	11.8	10.4	15.1
0580		2	42	162	98.7	37.7		119		120.5	0.987552				1.62	9.93	63.0	27.3	5.9	3.3	0.5	6.25	166	50.0	89.9	29.9	332	40.8	12.2	332	8.7	0.289	15.7	4.15	139.8	107.1	21	4.84	5.13	63	387	0.78	2.1	1.35	0.96	0.290	11.9	7.8	17.1
0581		1	34	167	103.8	37.4		120		116.5	1.03004				12.84	7.01	68.0	24.5	5.1	2.3	0.1	4.76	151	45.9	85.4	28.2	330	40.2	12.6	265	10.6	0.280	16.4	4.22	139.8	103.0	25.4	9.74	5.44	73.1	315	1.19	2.25	1.14	0.83	0.320	15.1	8.8	16.2
0582		2	20	153.9	122.2	51.6		154		149	1.03356				16.12	13.73	59.00	31.90	7.20	1.60	0.30	8.10	145.00	44.50	83.80	27.30	325.00	41.80	13.40	356.00	9.10	0.32	15.80	3.83	139.4	101.6	25.2	5.83	3.64	57.6	742	0.96	2.2	1.07	0.92	0.370	20.4	8.9	11.3
0583		2	31	159.1	88.5	35		112.1		114	0.983333				3.17	5.97	43.8	46.7	6.0	3.0	0.5	2.61	145	44.9	87.5	28.3	324	46.3	14.2	228	9.9	0.225	15.9	4.13	141.3	108.1	25.9	5.73	4.64	85	387	0.84	2.18	1.32	0.85	0.310	15.8	8.4	14.8
0584		2	33	155.1	79.7	33.1		96.4		108	0.892593				2.71	8.67	55.4	34.2	4.5	5.3	0.6	4.80	119	36.9	64.5	20.7	321	33.4	13.8	322	9.7	0.312	15.8	4.13	141.1	107.2	24.8	4.83	4.71	54.4	401	0.89	2.13	1.03	0.84	0.310	14.6	8.4	15
0585		2	37	154.4	85.5	35.9		115.5		123	0.939024				2.82	5.17	61.8	29.6	5.8	2.4	0.4	3.20	135	40.4	94.5	31.5	334	45.0	12.8	213	10.9	0.234	16.6	4.02	141.1	104.9	24.8	4.48	4.38	50.3	439.1	0.89	2.24	1.15	0.75	0.300	17.3	10.6	20.7
0586		2	34	165.2	123.7	45.3		153		146.3	1.0458				8.22	7.33	62.1	32.5	3.1	2.0	0.3	4.55	140	42.7	77.0	25.2	328	37.0	12.9	312	8.8	0.274	15.6	4.24	137.8	103.6	25.4	5.02	6.07	58	285	0.72	2.22	1.3	0.91	0.370	23.3	10.9	11
0587		2	49	148.3	73.4	33.4		97		101.5	0.955665				1.90	10.42	65.2	27.4	4.6	2.4	0.4	6.79	137	40.4	83.2	28.1	338	38.1	12.3	211	10.2	0.215	16.3	4.13	141.2	102.9	29.5	10.40	5.04	64	331	0.89	2.35	1.37	0.88	0.310	16.9	11.6	13.5
0589		2	34	155.3	97	40.2		112		126	0.888889				13.59	9.85	74.6	19.5	4.4	1.3	0.2	7.35	116	37.5	71.5	22.2	311	42.7	16.0	524	8.2	0.428	15.4	4.80	137.3	102.7	22.7	5.18	3.6	60.4	637.6	0.89	2.34	1.5	0.8	0.390	26.2	8.2	5.5
0590		2	43	162	77.7	29.6		94		103	0.912621				0.67	5.72	63.4	30.5	4.5	1.2	0.4	3.63	132	39.1	85.7	28.9	337	39.4	12.3	225	10.5	0.237	16.3	4.26	139.5	106.4	25.9	4.72	3.24	66	292	0.69	2.04	1.25	0.86	0.300	15.1	7.8	16.5
0591		2	24	157.3	84.2	34		103		113.5	0.907489				4.61	7.59	61.1	30.9	5.1	2.4	0.5	4.63	141	42.4	85.7	28.4	331	39.9	12.5	279	8.8	0.246	15.9	3.88	142.6	104.1	23.4	4.46	5.81	63	577	0.77	2.17	1.27	0.88	0.290	15.7	9.9	17.1
0592		2	34	156.3	113.5	46.5		113		131.2	0.86128				5.59	7.13	51.00	40.80	4.50	3.10	0.60	3.64	118.00	37.10	83.30	26.50	318.00	43.50	14.00	256.00	9.70	0.25	16.30	3.98	143.4	103.4	24.8	5.57	4.66	82	633	0.95	2.12	1.33	0.83	0.300	17.1	10.3	9.3
0593		2	41	160.6	87	33.7		100		115	0.869565				3.20	7.96	56.6	33.2	6.4	3.4	0.4	4.51	106	34.4	71.6	22.1	308	38.1	14.2	292	10.4			3.95	136.1	107.9	22.8	6.44	4.63	52	361	0.84	2.03	1.53	0.82	0.280	15.1	8.5	8.3
0594		2	34	161.3	83.2	32		106		114.5	0.925764				2.20	6.65	58.4	29.4	8.4	3.5	0.3	3.88	130	39.5	87.4	28.6	328	40.4	12.4	254	9.3	0.236	15.5	4.09	141.2	104.0	24.4	4.49	4.39	57	313	0.77	2.06	1.49	0.84	0.270	13.6	8.7	15
0595		1	19	176.3	158.8	51.1		149		139.3	1.06963				13.23	9.84	72.5	19.9	4.5	2.7	0.4	7.13	140	41.9	79.8	26.7	334	39.0	13.1	264	10.4	0.275	16.5	3.65	141.6	106.6	28	4.55	3.71	75	404	0.99	2.14	1.4	0.93	0.320	16.3	8.3	10.8
0596		1	29	181	115	35.1		117.5		112	1.04911				3.48	8.52	63.4	26.9	6.2	3.2	0.3	5.40	156	46.1	88.1	29.8	338	39.4	12.0	211	10.3	0.216	16.5	4.24	143.0	104.4	26.6	10.23	4.2	69	487	0.83	2.33	1.42	0.82	0.310	12.9	11.8	20
0597		1	34	180.3	131.4	40.4		126		117.5	1.07234				2.61	8.62	60.1	31.9	4.2	3.5	0.3	5.18	163	47.3	85.8	29.6	345	39.4	12.3	244	8.5	0.208	15.8	3.89	144.5	108.6	26.9	4.96	4.18	89	649	1.18	2.24	1.17	0.91	0.270	14.3	12.6	12
0598		2	48	161、6	99.2	38		118		122	0.967213				10.72	9.46	67.5	23.5	5.2	3.3	0.5	6.39	114	36.7	60.5	18.7	309	37.9	16.8	310	10.6	0.328	15.6	4.13	141.1	105.4	24.3	5.65	4.73	61	356	1.08	2.27	1.22	0.85	0.460	25.6	9.7	13.4
0599		1	20	185.4	153.9	44.8		135.5		138	0.981884				3.77	9.69	60.8	29.6	6.9	2.4	0.3	5.89	154	45.1	89.0	30.4	342	39.5	11.9	300	9.1	0.274	16.1	4.09	141.8	104.7	26.6	4.72	5.27	81	543	1.05	2.22	1.62	0.89	0.300	13.3	12.1	12.5
0600		2	35	156.6	76.7	31.3		105		103	1.01942				1.08	6.62	57.2	34.7	5.3	2.5	0.3	3.78	136	41.9	89.2	28.9	324	40.9	12.3	263	8.8	0.232	15.6	3.76	138.9	104.6	24.7	4.29	4.78	50.1	280.9	0.85	2.06	1.16	0.73	0.290	12.4	9.8	19.4
0601		1	39	176	103.8	33.7		111.5		114	0.97807				0.78	7.51	60.1	32.8	5.7	1.1	0.3	4.52	165	48.5	90.2	30.7	340	40.9	12.1	352	8.4	0.297	15.6	3.74	144.3	104.8	26.5	5.12	5.89	73	460	0.87	2.23	1.39	0.9	0.300	11.4	11.6	28.3
0602		2	31	158.5	87	34.8		114		117	0.974359				4.36	7.90	61.5	30.0	5.7	1.8	1.0	4.86	146	43.2	88.6	29.8	337	39.2	11.8	340	9.3	0.315	15.7	4.52	139.2	103.5	27.9	5.40	5.13	48	349	0.81	2.26	1.08	0.88	0.340	15.4	9.9	14.4
0603		2	23	166.4	91.5	33		109.5		112	0.977679				8.80	8.43	61.7	30.6	5.3	2.2	0.2	5.19	131	41.0	86.9	27.8	319	42.1	13.0	269	9.9	0.267	16.3	4.43	140.6	104.0	27.5	4.73	4.38	56.8	539.8	0.84	2.33	1.2	0.85	0.340	17.9	10.4	11.1
0604		2	23	155.6	108.2	44.7		129		122	1.05738				4.88	10.36	62.60	30.70	4.70	1.60	0.40	6.48	139	43.1	87.4	28.1	322.0	40.0	12.3	274	9.90	0.27	16.30	4.21	141.4	100.1	26.3	5.95	3.42	48	364	0.94	2.22	1.36	0.86	0.340	17.1	9	10.8
0605		1	25	166.2	91	32.9		112		106	1.0566				5.63	6.91	58.7	31.1	7.1	2.6	0.5	4.06	154	46.3	85.8	28.6	333	43.3	13.5	269	8.5	0.228	15.8	3.99	141.7	103.5	25	5.00	5.51	62.1	624.9	0.92	2.2	1.31	0.82	0.28	11.2	11.9	8.6
0606		1	44	167	112	40		126.5		120	1.05417				2.96	12.14	79.7	15.6	4.4	0.1	0.2	9.69	143	41.3	85.1	29.5	347	39.4	12.4	239	10.6	0.252	16.3	3.16	142.6	104.7	24.2	5.85	6.55	79	489	1.38	2.27	1.19	0.75	0.240	11.5	5.4	19.2
0607		2	20	161	125	48		141.5		131	1.08015				24.21	10.00	53.80	38.00	5.30	2.50	0.40	5.38	157.00	47.40	82.60	27.30	330.00	38.70	12.60	332.00	10.60	0.35	16.20	4.26	137.8	101.0	24.4	15.75	3.99	34.5	358.3	0.82	2.24	1.12	0.73	0.440	28.3	9.3	10.3
0608		2	21	159	123.6	48.9		138		143.8	0.959666				39.42	11.43	60.90	31.70	5.10	2.20	0.10	6.97	127.00	40.10	84.20	26.70	317.00	42.80	13.60	290.00	9.70	0.28	15.60	4.15	141.7	114.4	24.4	5.36	4.65	53	395	1.16	2.06	1.57	0.83	0.340	17.3	8.4	9.4
0609		2	51	156.6	69.6	28.4		102		99	1.0303				1.22	5.73	40.0	51.6	6.2	1.6	0.6	2.29	122	38.9	61.8	19.3	313	34.1	14.8	236	10.5	0.248	15.7	4.33	144.1	104.5	28.8	14.42	4.52	40	298	0.79	2.16	1.06	0.86	0.260	11.5	10.7	13.7
0610		1	32	180.2	154	47.4		143		134	1.06716				8.03	8.52	58.1	33.7	5.1	2.6	0.5	4.96	144	46.4	56.3	17.5	311	33.9	16.1	275	9.8	0.268	15.9	4.12	137.3	97.9	25.1	15.40	4.88	82.8	766.7	1.22	2.41	1.33	0.7	0.330	17.1	11.1	22.7
0611		2	36	158.9	91.5	36.3		124		120	1.03333				15.19	5.42	68.7	20.6	5.6	4.5	0.6	3.73	127	38.7	89.2	29.4	329	41.8	12.6	252	9.6	0.242	16.0	3.80	141.2	107.2	24.5	4.78	3.43	55.5	288.3	0.91	2.04	1	0.78	0.340	19.2	9.8	13.6
0612		2	34	155.1	86.2	35.8		105		114	0.921053				3.72	4.95	58.5	32.3	6.1	2.7	0.4	2.90	136	40.7	92.8	30.9	333	41.8	12.1	296	8.8	0.262	16.0	3.96	140.0	105.6	23.8	5.64	4.22	44.5	371.1	0.66	2.11	1.02	0.81	0.280	13.6	9.8	11.1
0613		2	42	153.1	75.6	32.2		99.5		108.5	0.917051				1.04	8.73	66.74	25.88	5.62	0.88	0.88	5.83	132.20	40.02	91.26	30.16	330.50	40.69	12.94	244.50	8.88	3.92	138.8	3.92	138.8	101.6	26.5	7.97	3.21	30.1	245	0.57	2.2	0.79	0.8	0.300	14.5	12.7	23.9
0614		1	32	172.7	111.1	37.3		121		120	1.00833				10.73	14.74	74.1	18.9	4.7	1.9	0.4	10.92	169	51.5	87.0	28.6	329	41.9	12.9	334	10.1	0.338	16.3	4.31	143.7	109.1	21.9	4.52	3.57	68	524	1.13	2.25	1.3	0.84	0.310	15.6	10.1	15.7
0615		2	17	140.8	102.2	51.6		139		142.5	0.975439				11.8	10.67	68.53	23.04	6.31	1.76	0.36	7.31	128.30	40.42	83.03	26.36	317.50	40.69	14.10	250.80	10.64			4.33	141.9	102.9	26.9	3.86	3.32	32	426	1.26	2.4	1.59	0.74	0.380	21.7	8.1	6.2
0616		2	51	165.9	85.8	31.2		110		107	1.02804				5.75	7.93	65.2	26.7	5.8	2.1	0.2	5.16	143	43.3	87.2	28.9	331	39.8	12.2	166	9.3	0.154	16.0	3.41	144.3	108.3	23.3	6.08	3.89	54	299	1.25	2.13	1.3	0.8	0.270	11.3	6.4	15.6
0617		2	33	156.4	104.2	42.6		103		128	0.804688				8.88	8.33	63.5	26.6	7.6	2.1	0.2	5.29	122	38.2	85.7	27.5	321	41.8	13.0	278	9.0	0.249	16.1	3.86	140.7	107.6	21.6	4.91	3.97	65	420	1.08	2.15	1.1	0.9	0.280	10.4	7.2	9.1
0618		2	33	165.1	93.7	34.4		110		107	1.02804				5.26	8.22	45.7	45.7	4.0	4.2	0.4	3.75	158	43.2	84.6	31.0	366	39.1	12.4	264	9.8	0.260	16.5	3.84	134.8	98.4	20.8	19.84	3.61	10.1	462.2	0.68	2.24	1.03	0.97	0.340	16.4	7.4	9.2
0619		2	25	163.2	96.2	36.2		110		118.5	0.92827				11.71	7.80	54.7	35.2	6.5	3.0	0.6	4.26	123	37.8	83.8	27.3	326	43.8	14.0	226	9.8	0.221	15.8	3.63	140.9	103.3	24.4	4.56	4.73	44.1	449.3	0.85	2.17	1.14	0.78	0.330	14.9	8.4	5.5
0620		2	31	162.5	93.8	35.5		103.5		116.5	0.888412				3.55	7.81	53.6	39.5	4.1	2.4	0.4	4.19	123	37.7	92.3	30.2	328	43.6	12.7	246	10.9	0.268	16.1	3.81	140.4	105.9	22.9	5.51	2.4	46.8	448.8	0.91	2.11	1.2	0.85	0.360	18.2	8	13.9
0621		2	35	165.2	97.1	35.6		125.5		127	0.988189				8.82	11.70	90.2	8.3	1.3	0.1	0.1	10.56	134	41.1	92.1	30.1	327	42.4	12.3	339	8.2	0.278	15.3	3.83	142.4	107.2	25.8	5.57	4.84	57.6	410.5	0.81	2.18	1.12	0.82	0.320	17.3	10.3	11
0622		2	33	165.8	131	47.7		143		132	1.08333				15.14	8.04	60.1	30.8	5.6	3.2	0.3	4.83	153	47.8	91.6	29.4	321	41.6	12.2	339	10.0	0.339	15.8	4.43	139.7	105.0	22	8.63	4.71	57	454	1.05	2.37	1.43	0.87	0.340	17.1	10.4	21.5
0623		1	31	177.2	112.7	35.9		118		112.8	1.0461				4.98	7.49	55.0	34.5	7.0	2.8	0.7	4.13	162	48.5	88.0	29.4	334	39.1	11.9	244	9.7	0.236	16.3	3.96	142.3	111.1	23.3	10.10	4.92	53	362	0.88	2.18	1.47	0.91	0.280	12.7	9.8	11.3
0624		2	30	160	100.5	39.3		121		118	1.02542				3.43	6.25	53.0	39.9	3.8	2.9	0.4	3.31	164	49.0	85.0	28.5	336	36.6	11.5	258	10.0	0.258	16.2	3.95	140.2	105.1	23.3	7.13	5.19	52	416	0.88	2.23	1.13	0.79	0.320	17.2	11	18.4
0625		2	42	157.1	80.7	32.7		98.2		108	0.909259				4.34	7.73	57.1	35.2	6.1	1.1	0.5	4.41	146	43.4	84.9	28.5	336	36.5	11.5	278	9.1	0.254	16.0	4.14	139.4	103.6	24.8	6.19	5.11	62.8	507.2	0.85	2.3	0.84	0.91	0.310	14.9	10.2	15.8
0626		2	36	167.8	94.6	33.8		107		122.5	0.873469				4.12	6.19	50.6	43.0	4.5	1.6	0.3	3.13	127	39.1	88.4	28.6	324	41.5	12.6	282	7.7	0.216	15.3	3.91	139.4	108.0	24.5	7.29	5.53	27	315	0.69	2.05	1.07	0.81	0.300	14.3	9	7.8
0627		2	31	168.5	129.1	45.5		139.5		130.5	1.06897				5.42	5.44	55.7	35.4	6.2	2.2	0.5	3.02	125	40.9	86.7	26.5	306	47.7	14.7	301	10.1	0.304	15.9	4.38	154.8	114.5	25.9	5.24	3.85	69	539	1.01	2.19	1.44	0.91	0.310	13.8	9.7	8
0628		2	70	146.4	83.1	38.8		123.5		120.5	1.0249				8.18	7.99	69.6	24.4	4.4	1.3	0.3	5.57	128	40.5	89.3	28.3	317	45.0	13.5	225	10.3	0.232	15.9	3.79	141.7	105.4	26.5	9.27	4.46	43.5	287.1	0.97	2.2	1.19	0.77	0.380	20.9	9.1	10.2
0629		2	36	155.3	99.7	42.4		122.5		124	0.987903				7.37	8.01	66.7	28.3	3.8	0.7	0.5	5.34	146	44.2	91.3	30.1	329	42.3	12.4	331	9.5	0.314	16.1	4.25	141.0	101.3	28.8	5.10	4.86	48	458	0.78	2.35	1.09	0.91	0.340	17	11.1	19.8
0630		2	27	161.2	89.1	34.3		102.5		115.5	0.887446				10.98	6.25	64.8	28.3	5.4	1.2	0.3	4.04	147	45.9	88.4	28.4	321	40.9	12.4	266	10.5	0.280	16.2	4.09	141.7	106.4	27.5	5.37	4.02	59	530	0.85	2.36	1.05	0.94	0.340	17.5	11.7	16.3
0631		2	24	162.6	117	44.3		123		133	0.924812				20.22	8.93	54.9	38.0	3.7	2.9	0.5	4.91	133	41.8	87.3	27.8	318	40.7	12.5	234	10.8	0.252	16.1	4.04	142.2	104.3	25.5	4.93	5.96	60	507	1.27	2.23	1.36	0.93	0.310	13.9	10.9	13.6
0632		2	25	171	115.6	39.5		114		127	0.897638				6.62	8.00	53.5	37.0	5.1	3.9	0.5	4.28	133	40.7	90.4	29.4	325	41.1	12.2	270	10.8	0.292	15.9	4.06	140.6	105.4	24.5	4.75	4.34	57.8	496.6	0.87	2.24	1.09	0.85	0.310	14.1	10.7	12.6
0633		1	30	177.9	112.9	35.7		112.5		114	0.986842				1.67	7.07	59.3	31.4	7.1	1.7	0.5	4.19	162	47.4	90.5	30.9	342	39.3	11.6	223	9.1	0.204	15.8	3.71	141.9	104.4	26.4	5.13	5.3	68	536	1.14	2.33	1.15	0.78	0.250	9.9	9.7	34.2
0634		2	30	166.5	121.7	43.9		123.5		141.5	0.872792				8.11	10.50	60.5	31.6	6.7	0.9	0.3	6.36	155	46.9	87.8	29.0	331	39.4	12.0	277	9.6	0.266	15.6	3.90	138.3	102.0	28.6	5.46	4.06	59	203	0.98	2.11	1.03	0.88	0.33	16.3	9.6	16
0635		2	52	147.7	61.6	28.6		86.5		96	0.901042				5.59	7.08	62.6	28.2	6.5	2.3	0.4	4.43	123	38.6	89.5	28.5	319	39.8	11.9	321	8.5	0.273	15.6	4.01	145.5	109.9	26	6.18	6.28	68	434	1.11	2.2	1.57	0.98	0.310	15.9	9.2	7.7
0636		2	50	152	67.6	29.3		95		100	0.95				2.33	5.71	50.6	36.8	6.2	6.1	0.3	2.89	145	45.1	85.9	27.6	321	41.2	12.9	232	9.8	0.226	15.9	4.33	143.6	104.5	28.7	5.85	3.71	53.4	459.8	1	2.3	1.14	0.9	0.290	13.3	12.5	24.2
0637		1	24	174.6	125.6	41.2		133.5		122	1.09426				6.29	6.47	61.4	25.8	9.9	2.1	0.8	3.97	156	47.6	88.5	28.9	327	43.9	13.3	249	9.3	0.232	15.9	4.37	142.6	104.2	27.8	7.25	5.55	66	568	1.01	2.34	1.39	0.92	0.270	12.2	12.4	28.1
0640		2	22	150	89.7	39.9		114		117	0.974359				10.05	11.46	73.4	19.9	5.2	1.2	0.3	8.41	138	42.7	81.1	26.2	324	36.6	12.1	339	10.3	0.349	15.9	4.21	136.5	106.5	27.6	5.77	3.89	39	400	0.91	2.31	1.16	0.86	0.33	21.2	9.4	4
0641		2	36	155.1	166.1	56.2		150		162	0.925926				8.58	9.52	64.9	24.4	6.4	3.8	0.5	6.18	147	45.9	87.8	28.2	321	42.6	13	310	10.1	0.31	16.2	4.17	141.7	104.3	24	6.15	3.21	60	404	0.86	2.18	1.41	0.84	0.34	19.6	10.3	11.8
0642		2	27	160.1	113.9	44.4		114.5		129	0.887597				5.96	8.74	54.1	35.2	6.8	3.7	0.2	4.73	133	39.8	91.8	30.7	334	41.1	12	275	9.1	0.251	16.1	3.86	141.1	105.5	26	5.14	3.48	42	503	0.93	2.2	1.3	0.76	0.29	13	7.6	15.3
0643		1	35	175	142	46.5		139		127.4	1.09105				1.26	6.22	67.1	23.6	5.4	3.7	0.2	4.17	157	46	88.5	30.3	342	39.7	12	184	9.8	0.18	16	3.83	140.4	104.1	27	4.83	3.84	76	495	0.98	2.19	0.86	0.8	0.16	13.5	10.6	26.1
0644		2	40	158.8	124.3	49.3		125		130.3	0.959325				2.19	7.5	66.9	25.4	5	2.4	0.3	5.01	118	36.8	79.3	25.5	322	36.9	12.5	384	9.9	0.381	15.9	4.34	141.8	107.9	22.1	6.42	4.03	56	390	0.81	2.24	1.07	0.78	0.2	24.6	12.6	8.7
0645		1	34	166	101.4	36.7		131		115	1.13913				26.26	12.04	65.5	26.9	6.1	1.1	0.4	7.89	163	48.3	85.9	29	337	42.4	13.2	300	8	0.24	15.7	4.02	142.8	104.2	23.8	5.12	6.49	51	589	0.94	2.31	1.31	0.95	0.43	21.3	11.6	10.2
0646		1	34	171.9	150.5	50.9		152		150	1.01333				27.21	8	77.6	15.5	4.6	2	0.3	6.21	156	48.4	82.3	26.5	322	39.6	12.8	231	9.3	0.21	16	3.9	139.4	100.6	26.2	10.94	6.09	43.7	437.8	0.97	2.32	1.11	0.84	0.41	18.7	11.7	11.6
0647		1	31	172.4	121.2	40.8		126.5		127	0.996063				7.81	9.3	52.1	38.9	5.7	2.9	0.4	4.84	166	50.4	87.4	28.8	330	39.8	12.2	295	8.9	0.263	16	4.36	144	106.3	26.4	4.99	5.25	73	490	1.03	2.32	1	0.99	0.35	14.4	13.9	21.1
0648		2	42	161.7	92.6	35.4		103		115	0.895652				13.71	9.28	69.3	23.8	4.4	2.3	0.2	6.43	147	44	86.2	28.7	333	41.3	12.8	289	10.1	0.291	16.2	3.45	139.5	100.6	26.7	5.09	5.25	58.3	421	0.81	2.21	0.94	0.84	0.42	23	10.6	7.7
0649		1	53	167.1	87.4	31.3		112		105	1.06667				0.38	5.26	46.5	45	7	1.1	0.4	2.44	160	46.1	93.5	32.5	347	40.3	11.5	217	9.3	0.203	16.2	3.47	142.7	106.1	27.2	5.45	5.34	76	477	0.92	2.24	1.18	0.91	0.29	11.2	9.8	21.3
0651		2	44	165	138.8	51.3		136.2		148.5	0.917172				6.37	8.69	62.00	28.60	5.00	3.60	0.80	5.39	132.00	40.70	86.60	28.20	325.00	41.80	12.90	338.00	9.30	0.31	15.90	4.20	140.9	103.1	29	8.66	3.87	50.3	444.6	1.01	2.09	1.25	0.8	0.37	20.6	11.3	13.6
0652		2	44	160	82.2	34.5					#DIV/0!				3.28	6.68	64.7	25.5	6.9	2.2	0.7	4.32	149	45.1	88.0	29.2	331	40.8	12.4	408	8.0	0.325	15.7	4.28	140.9	108.0	22.6	6.01	5.63	49	352	0.68	2.25	1.23	0.92	0.360	18.4	13	8.4
0653		2	20	163	111.6	42		124.5		128	0.972656				13.11	6.51	59.0	34.8	5.0	1.0	0.2	3.83	148	45.1	87.8	28.8	327	39.7	12.1	214	12.2	0.260	16.4	4.02	136.9	99.2	23.5	15.38	3.64	32.4	374.2	0.56	2.31	1.22	0.77	0.4	19.9	10.7	13.6
0655		2	37	164.6	95.6	35.3		114.6		110	1.04182				6.68	6.38	50.0	40.5	6.6	2.4	0.5	3.20	150	45.2	89.2	29.6	332	40.4	12.1	261	10.2	0.266	16.3	4.24	142.6	108.4	25.4	8.21	4.2	55	518	0.84	2.35	1.08	0.87	0.330	15.3	13.1	18
0656		2	23	153	106.6	45.5		123		135	0.911111				9.69	12.60	72.2	20.1	6.2	1.0	0.5	9.10	158	48.5	86.1	28.0	325	39.9	12.4	288	10.7	0.307	16.4	3.86	138.4	102.0	21.7	9.92	4.6	70.2	518.7	1.11	2.37	1.25	0.74	0.370	17.6	10.4	17.7
0657		2	48	155.2	94.8	39.4		103		120.5	0.854772				12.43	6.97	65.6	24.3	6.5	3.2	0.4	4.58	129	41.3	83.4	26.1	313	43.6	14.0	313	8.4	0.264	15.9	4.09	141.3	102.4	28	4.80	4.22	58.5	543.3	1.06	2.13	1.27	0.83	0.360	15.3	9.7	9.3
0658		2	33	158.2	96.5	38.4		123.5		120	1.02917				5.74	8.91	62.6	29.7	5.7	1.5	0.5	5.58	131	39.9	88.2	29.1	330	40.9	12.4	286	9.8	0.279	16.0	4.27	143.4	110.3	23.2	5.82	4.99	52	374	0.82	2.2	1.18	0.77	0.330	12.2	8.8	20.9
0659		2	23	157	100	40.6		127		120	1.05833				1.82	11.59	64.9	29.5	3.7	1.5	0.4	7.52	144	44.8	76.3	24.6	322	37.5	13.1	313	11.3	0.353	17.0	4.63	140.4	105.0	25.4	5.02	2.94	72	481	0.89	2.5	1.39	0.91	0.380	15.2	10.4	8.3
0660		2	35	159.2	97.3	38.4		119		122	0.97541				3.10	8.27	59.3	32.2	4.6	3.3	0.6	4.91	141	44.3	88.6	28.2	318	41.1	12.4	319	8.9	0.283	15.9	4.22	138.9	104.9	23.5	4.82	6.02	56.7	408.3	0.97	2.2	1.13	0.81	0.350	7.6	7.1	12.1
0661		2	60	149.2	81.6	36.5		111		130	0.853846				<0.50	7.01	61.10	28.23	7.94	1.83	0.90	4.28	111.10	35.31	77.41	24.35	314.60	43.31	16.21	353.80	8.05			4.15	140.0	108.3	19.9	5.05	4.77	77	245	0.86	2.1	1.31	0.88	0.330	21.1	8.9	6.8
0662		2	25	161.5	125.7	48.2		126		142.5	0.884211				1.6	4.97	68.70	23.36	6.11	1.44	0.39	3.42	144.10	42.22	92.16	31.45	341.30	40.69	12.86	160.10	8.54			3.36	143.5	108.5	22.5	6.27	4.67	56	322	0.94	1.99	1.36	0.8	0.300	17.1	9.4	17.1
0663		2	53	151.9	83.5	36.2		105		115.5	0.909091				12.3	10.20	62.50	31.70	3.40	2.10	0.30	6.38	145.00	44.80	81.50	26.30	323.00	38.50	12.70	345.00	9.20	0.32	15.80	3.85	141.0	106.3	23.1	5.70	4.43	68	521	1.01	2.2	1.02	0.95	0.350	13.6	9.6	15.6
0664		2	39	166.8	99.5	35.8		125		117	1.06838				12.24	11.17	59.80	33.10	3.30	3.40	0.40	6.68	161.00	49.50	85.30	27.70	325.00	43.90	13.80	289.00	8.50	0.25	15.60	3.63	138.3	100.6	26	7.82	5.35	58	366	0.89	2.14	1.18	0.82	0.330	16.9	10.7	11.1
0665		2	35	170.4	159.2	54.8		145		152.5	0.95082				13.54	6.81	68.8	23.8	4.9	1.8	0.7	4.69	145	44.0	81.8	27.0	331	40.4	13.2	286	9.6	0.274	16.3	3.36	140.4	100.0	26.1	10.30	4.62	53.4	268.3	1	2.27	1.11	0.74				9.4
0666		2	44	155	27.4	32.2		104.5		102.5	1.01951				2.40	7.46	60.5	33.4	4.8	0.8	0.5	4.51	111	36.2	81.9	25.1	307	46.8	15.3	358	9.3	0.332	15.6	4.20	136.9	102.4	23.7	5.56	4.74	53.9	272.7	0.71	2.15	1.06	0.91	0.400	22.4	8.1	6.1
0667		2	29	161.5	123.1	47.2		130		146	0.890411				50.27	10.99	65.3	28.9	4.9	0.5	0.4	7.18	140	45.1	83.9	26.0	310	44.1	14.1	360	10.5	0.377	16.2	4.16	137.8	101.1	24.9	5.98	5.36	57.9	371.9	1	2.24	0.81	0.81	0.440	30.4	11.2	9.4
0668		1	35	165.1	127.8	46.9		137		128	1.07031				1.95	7.07	54.87	30.82	12.28	1.41	0.62	3.88	162.30	49.44	101.10	33.19	328.30	49.00	14.06	192.20	8.64	0.15	0.011	3.54	141.7	103.1	26.7	6.04	3.78	66.4	528.1	1.17	2.12	1.43	0.79	0.290	12.4	11.2	19.6
0669		2	24	163.5	105.6	39.5		118.5		125	0.948				8.37	7.56	68.4	24.6	4.4	2.2	0.4	5.17	133	40.7	88.7	29.0	327	40.1	12.1	239	9.9	0.237	16.2	4.41	143.0	106.2	24.3	4.92	3.29	52	286	0.86	2.36	1.1	0.96	0.340	20.2	12.2	18.9
0670		1	24	175	139.7	45.6		142		128.5	1.10506				7.54	8.79	58.2	32.0	6.0	3.4	0.4	5.11	173	52.1	86.3	28.6	332	43.9	13.6	256	9.2	0.236	15.8	3.67	142.0	102.0	31.1	5.73	5.57	74	591	1.21	2.24	1.4	0.88	0.340	18.2	11.5	21.7
0671		1	28	180.4	121.7	37.4		121		119.5	1.01255				15.55	8.79	65.4	25.2	4.8	4.2	0.4	5.74	159	47.6	88.8	29.7	334	41.7	12.6	280	8.2	0.229	15.8	4.09	140.8	104.9	25.1	7.23	4.27	80	470	1.06	2.27	1.51	0.85	0.370	21.2	10.4	14.6
0672		2	34	169.5	120.3	41.9		123.5		124	0.995968				3.15	7.29	64.1	29.1	4.6	1.9	0.3	4.67	151	45.0	87.4	29.3	335	40.4	12.4	257	10.0	0.257	16.5	4.06	137.8	100.7	23.7	14.41	3.17	38	354	0.71	2.25	1	0.8	0.320	16.4	11.1	15.8
0673		2	22	170.8	124.6	42.7		122		136	0.897059				6.44	8.51	59.0	35.4	3.9	1.3	0.4	5.03	141	43.3	85.0	27.7	326	39.1	12.3	241	9.8	0.236	16.3	4.00	140.6	106.3	23.7	5.06	4.33	56.3	453.2	0.83	2.2	1.05	0.84	0.320	16.1	12.9	13.6
0674		2	58	157.5	86.6	34.9		119		114.5	1.0393				1.73	4.62	43.42	43.62	7.38	4.80	0.78	2.01	129.20	39.70	90.14	29.34	325.50	41.56	13.40	237.30	9.19			4.01	142.7	104.8	28.2	4.95	6.34	49.2	418.1	0.84	2.12	1.38	0.77	0.320	17.3	9.7	13.5
0675		2	34	154.4	70.7	29.7		86.5		106.5	0.812207				5	5.63	58.63	30.73	9.00	1.38	0.26	3.30	107.00	32.70	97.24	31.81	327.10	46.38	13.90	318.10	7.82			3.84	138.1	101.9	25.3	4.33	5.3	46.9	473.5	0.93	2.12	1.42	0.71	0.350	20.1	8.6	7.5
0676		1	32	168.1	87.9	31.1		111.5		106	1.05189				3.1	9.84	66.82	22.84	8.01	1.86	0.47	6.58	158.70	49.25	86.12	27.74	322.20	40.69	13.68	283.00	7.98			4.35	141.7	103.3	26	3.26	4.03	83.6	535.6	0.89	2.26	1.21	0.86	0.330	15.7	12.5	14.7
0677		2	34	156	87.1	35.8		108		114	0.947368				5.00	8.00	56.59	34.67	6.14	2.17	0.43	4.53	131.20	41.92	69.17	21.65	313.00	37.63	15.55	171.40	10.91			4.14	137.5	101.4	24.7	6.32	6.53	54.5	644.2	0.81	2.15	1.17	0.78	0.330	17.5	10	14.9
0678		1	31	162	101.9	38.8		123.5		112	1.10268				3.62	9.90	50.15	29.90	7.28	11.47	1.20	4.97	135.90	41.42	90.99	29.86	328.10	41.56	13.18	334.70	8.60			4.07	138.7	102.9	24	3.98	4.61	76.6	449.4	0.92	2.09	1.26	0.77	0.330	17.2	10.8	17.6
0679		2	37	158	94.9	38		112		116	0.965517				4.71	5.75	63.9	28.0	6.2	1.6	0.3	3.67	132	41.6	76.9	24.4	317	40.0	13.9	168	9.5	0.160	16.2	3.48	138.5	107.8	24.6	5.86	4.97	53	446	0.85	2.14	1.19	0.75	0.310	16.9	10.1	13.1
0680		2	25	169.2	116.3	40.6		101		134	0.753731				3.64	9.80	56.1	37.4	4.2	1.7	0.6	5.49	138	41.1	87.5	29.5	337	40.5	12.4	217	10.7	0.232	16.7	3.68	137.8	107.9	23.7	5.06	3.95	51	486	0.87	2.16	1.3	0.81	0.360	20.2	9.1	11
0681		2	28	169.2	103	35.9		108		119.2	0.90604				2.00	7.61	58.7	35.3	4.8	0.9	0.3	4.46	138	40.7	89.1	30.1	338	40.5	12.2	213	10.0	0.214	15.9	3.68	143.2	105.9	25.4	5.14	5.45	56	354	0.83	2.25	1.59	0.83	0.330	17.1	10.5	11.6
0682		2	23	181.3	123.6	37.6		126.5		120	1.05417				5.52	13.68	57.6	33.4	5.1	3.5	0.4	7.88	118	38.9	64.4	19.6	304	35.5	14.7	320	10.3	0.329	16.3	4.03	138.8	101.5	24.1	4.10	3.66	57.9	592	0.72	2.18	1.49	0.76	0.350	16.5	11.6	8.2
0683		2	41	168.5	118.4	41.7		120		135	0.888889				13.59	7.77	63.6	29.1	4.5	2.2	0.6	4.94	148	44.8	89.8	29.6	330	41.6	12.4	267	10.2	0.271	16.1	4.00	139.0	103.1	23.7	5.97	4.72	60.8	388.7	0.86	2.17	0.95	0.93	0.400	23.4	11.6	16.4
0684		1	47	167.5	177.8	63.4		172		146.5	1.17406				132.71	15.88	88.4	4.2	7.1	0.3	0.0	14.03	119	35.5	86.8	29.1	336	46.9	14.4	99	11.4	0.112	16.7	4.24	131.3	99.1	22.6	6.51	9.15	71	395	1.29	2.26	0.92	0.68	0.390	19.5	4.2	3.1
0685		1	28	173.7	92.1	30.5		100		101	0.990099				1.25	12.54	64.43	27.02	7.09	0.86	0.60	8.07	160.80	49.70	93.19	30.15	323.60	47.69	14.77	224.00	9.22			4.09	144.0	107.5	25.7	4.42	6.39	87.7	442.4	1.2	2.33	1.37	0.92	0.320	18.7	10.6	12.6
0686		2	27	159.1	99.1	39.2		115.5		122.5	0.942857				6.67	9.11	58.8	35.3	4.6	1.0	0.3	5.35	143	44.8	85.4	27.2	318	40.8	12.7	335	8.3	0.279	16.0	3.86	137.3	102.5	23.9	5.80	2.89	44.8	355.5	0.82	2.23	1.46	0.87	0.370	21.9	10	13.2
0687		1	35	176.8	159	50.9		150.3		137	1.09708				5.23	6.92	55.9	35.8	5.6	2.4	0.3	3.86	160	48.9	87.9	28.8	328	39.7	12.1	224	10.7	0.240	16.2	3.69	142.2	103.5	28	7.68	4.12	85	540	1.03	2.26	1.04	0.76	0.370	20.8	9.9	13.4
0688		2	47	78	150	34.66		101		未测	#VALUE!				42.67	20.92	85.2	8.2	6.4	0.1	0.1	17.82	154	55.5	90.8	25.2	277	66.7	19.8	375	9.0	0.339	16.2	4.44	138.5	92.5	36.9	11.21	13.27	179	656	1.76	1.92	2.55	0.92	0.480	31	10.2	5.1
0689		2	28	170	97.5	33.7		119		115	1.03478				5.98	5.90	55.5	36.6	5.7	1.6	0.6	3.27	132	41.5	83.8	26.6	317	47.8	15.2	502	9.1	0.456	15.6	4.04	141.4	105.1	25.1	5.51	3.97	42	318	0.75	2.23	1.17	0.8	0.430	26.2	11.9	12.9
0690		1	33	166.8	127.8	45.9		138		115	1.2				43.54	13.18	79.70	13.00	4.40	2.60	0.30	10.51	95.00	28.70	86.80	28.80	332.00	45.00	13.90	341.00	9.20	0.31	16.00	4.99	140.3	106.2	15.7	4.96	32.48	1301	452	3.81	1.11	2.73	0.72	0.380	19.6	6.1	11.2
691		1	31	169.3	136.1	47.5		136		129	1.05426				8.6	8.06	62.60	28.10	5.70	3.10	0.50	5.05	159.00	49.10	88.50	28.70	324.00	40.90	12.40	286.00	10.80	0.31	16.70	4.61	140.1	102.7	27.1	6.81	5.56	58	504	0.93	2	1.15	0.99	0.370	19.3	10.5	19.6
692		2	34	166.1	101.7	36.9		133		128.5	1.03502				10.71	7.03	71.0	19.9	5.2	3.7	0.2	4.99	137	42.6	85.9	27.6	321	42.4	13.2	273	9.1	0.249	15.9	4.31	140.5	108.5	20.9	5.31	7.15	55.2	406.5	0.85	2.19	0.99	0.78	0.400	22.3	8.9	6.5
693		2	46	155.4	89.7	37.1		107		109	0.981651				3.99	5.99	67.5	25.0	5.5	1.3	0.7	4.04	119	36.4	87.1	28.5	327	43.5	13.4	252	9.4	0.237	15.8	3.66	140.9	101.8	28	5.30	5.22	51.6	398	0.8	2.1	1.45	0.78	0.320	16	7.4	12.8
694		2	15	160	92.7	36.4		104.5		119	0.878151				6.07	10.60	89.9	7.1	2.9	0.1	0.0	9.53	140	41.8	84.0	28.1	335	39.1	12.4	247	11.1	0.275	16.2	4.31	136.9	108.7	23.4	8.34	1.81	54	200	0.64	2.05	1.1	0.68	0.320	14.2	7.5	12.8
695		1	35	165.6	182.2	66.4		160.3		151	1.06159				15.25	12.09	58.80	31.00	6.90	2.80	0.50	7.11	155.00	47.40	87.60	28.70	327.00	42.90	13.10	290.00	10.20	0.30	16.10	3.70	140.1	108.4	25.2	9.30	6.26	50	588	1.05	2	1.32	0.78	0.340	16.6	6.7	14.3
696		2	52	168.1	114.5	40.5		121.5		125	0.972				15.64	9.67	70.9	24.0	3.9	0.9	0.3	6.85	144	43.3	91.9	30.5	332	43.6	12.7	237	10.1	0.240	16.1	3.72	137.9	101.0	23.6	9.54	5.01	43.6	391.2	0.76	2.13	0.95	0.72	0.360	19.3	8.3	14.5
697		1	16	177.1	134.3	42.8		130.4		129	1.01085				4.48	9.96	51.4	41.5	4.8	2.1	0.2	5.12	167	50.6	82.3	27.1	329	38.9	12.7	254	10.6	0.268	16.1	4.25	140.6	103.7	24	5.70	4.72	96	616	1.11	2.24	1.53	0.98	0.330	16.6	12.7	28.6
698		1	47	172.2	102.7	35		119		115	1.03478				4.22	5.16	68.9	24.1	5.3	1.5	0.2	3.56	154	45.5	88.7	30.0	338	39.5	11.9	130	9.8	0.127	16.7	3.56	141.2	107.0	24.8	6.39	6.38	80	347	1.17	2.03	1.18	0.81	0.280	12.9	9	18.1
699		1	23	179.8	135.6	41.9		133		127	1.04724				7.91	10.39	67.2	25.0	4.6	2.9	0.3	6.98	158	47.5	82.8	27.6	334	39.8	12.8	353	8.6	0.303	15.9	4.22	143.5	106.0	24.3	8.44	4.08	63	464	0.97	2.34	1.02	0.9	0.330	16.7	8.5	15.4
700		2	38	163.5	85.2	31.9		100		113	0.884956				1.18	6.25	53.9	38.5	5.2	2.0	0.4	3.35	155	47.1	89.0	29.2	328	41.4	12.4	242	10.3	0.248	16.5	3.92	139.6	102.5	27.2	6.57	3.88	59	329	0.76	2.22	1.06	0.91	0.320	13.6	10.9	23.5
701		2	27	164	96.3	35.8		107.5		124.5	0.863454				8.24	6.20	55.2	35.5	8.1	0.9	0.3	3.42	128	39.6	84.3	27.2	323	42.4	13.4	278	11.0	0.306	16.2	4.17	142.2	104.6	23.4	5.36	7.12	53	351	0.71	2.09	1.77	0.87	0.400	22.2	8.4	7.2
702		2	35	154.3	91.9	39		119.5		113	1.05752				6.20	6.18	57.4	33.9	6.0	2.3	0.4	3.55	145	42.5	81.6	27.8	341	36.3	11.9	262	9.1	0.238	15.9	3.88	142.2	103.6	21.5	16.55	3.14	51	575	0.66	2.14	1.24	0.72	0.340	15.2	11.3	13.8
703		1	39	171.7	149.3	51		142		146	0.972603				5.95	7.53	58.8	29.7	6.4	4.6	0.5	4.42	172	51.8	88.4	29.3	331	41.9	12.7	274	9.2	0.252	15.9	3.95	142.9	104.2	23.7	5.45	5.86	72	638	0.85	2.12	1.39	0.94	0.350	18.1	10.6	11.9
704		1	26	168.9	109.2	38.3		122		115	1.06087				5.94	4.37	53.9	33.5	7.6	4.6	0.4	2.36	156.00	47.2	87.2	28.84	330.50	38.5	11.8	152	9.9	0.151	16.6	3.88	140.8	105.4	23.8	6.63	3.39	65	443	0.8	2.06	1	0.88	0.390	14.6	5.8	13.9
[truncated: 25 more columns]
